# Supplementary material for: Dinuclear zinc catalysis of a kinetic resolution strategy for distinguishing one pair of diastereoisomers from multiple stereoisomers
Source: Royal Society of Chemistry journal article supplement (doi:10.1039/d4qo01051e), 2024-01-01
Supplement: d4qo01051e1.pdf [file d4qo01051e1.pdf]

## Supporting Information

# Dinuclear Zinc Catalysis of a Kinetic Resolution Strategy of Distinguishing One Pair of Diastereoisomers From Multiple Stereoisomers

Ying-Hui Zhai,<sup>[a]</sup> Jia-Qi Wen,<sup>[a]</sup> Meng-Meng Liu,<sup>\*[a]</sup> Guang-Jian Mei,<sup>[a][b]</sup> Shi-Kun Jia,<sup>\*[a][b]</sup> Min-Can Wang,<sup>[a]</sup> Yuan-Zhao Hua<sup>\*[a][b]</sup>

[a] College of Chemistry and Institute of Green Catalysis, Zhengzhou University, No. 100, Science Road, Zhengzhou City, Henan Province 450000, P. R. China

[b] Pingyuan Laboratory, Zhengzhou University, No. 100, Science Road, Zhengzhou City, Henan Province 450000, P. R. China

## Table of Contents

|                                                                                                  |      |
|--------------------------------------------------------------------------------------------------|------|
| General Information.....                                                                         | S2   |
| General Procedure for optimization of the reaction conditions.....                               | S2   |
| General Procedure for enantioenriched <b>3</b> and <b>1a'</b> .....                              | S3   |
| General Procedure for <b>4</b> .....                                                             | S19  |
| Gram-Scale Reaction .....                                                                        | S22  |
| Derivatization of Product.....                                                                   | S22  |
| Control Experiment .....                                                                         | S25  |
| NMR Spectra of compounds <b>3</b> , <b>4</b> , <b>5</b> , <b>6</b> , <b>7</b> and <b>8</b> ..... | S27  |
| HPLC spectra of compounds .....                                                                  | S76  |
| Single-crystal X-ray diffraction .....                                                           | S105 |

## General Information

All the dry solvents were treated prior to use according to the standard methods. Unless otherwise noted, all reactions sensitive to air or moisture were carried out under nitrogen using standard Schlenk and vacuum line techniques. Diethylzinc (1.0 mol/L in hexane) was purchased from Aldrich and used as received. **Cat1**<sup>1</sup>, **Cat2**<sup>2</sup>, and substrates **1**<sup>3</sup> were synthesized according to the literature. Other reagents were obtained from commercial sources and used as received without further purification.

Melting points were determined using YRT-3 melting point apparatus and are uncorrected. Optical rotations were measured with Perkin Elmer, model 341 Polarimeter at 20 °C in THF. <sup>1</sup>H and <sup>13</sup>C NMR spectra were measured on a Bruker DPX 400 NMR instrument (400 MHz for <sup>1</sup>H NMR and 100 MHz for <sup>13</sup>C NMR). Tetramethylsilane (TMS) served as the internal standard (0 ppm) for <sup>1</sup>H NMR and <sup>13</sup>C NMR. NMR data are represented as follows: chemical shift ( $\delta$  ppm), multiplicity (s = singlet, d = doublet, t = triplet, q = quartet, m = multiplet, comp = complex), coupling constant in Hertz (Hz), integration. FT-IR spectra were recorded on a Perkin Elmer Spectrum Two L600 and are reported in terms of frequency of absorption (cm<sup>-1</sup>). High-resolution mass spectra (HRMS) were obtained using an Agilent LC-MSAD-Trap-XCT instrument using electrospray ionization time-of-flight (ESI-TOF). High performance liquid chromatography (HPLC) was performed on instrument consisted of JASCO model PU-1580 intelligent HPLC pump and JASCO model UV-1575 intelligent UV-vis detector (254 nm) using Daicel Chiralpak IA, IC, ID, IE or IF (4.6 mm  $\times$  250 mm) columns.

S1. Trost, B. M.; Ito, H. *J. Am. Chem. Soc.* **2000**, *122*, 12003–12004.

S2. Hua, Y.-Z.; Han, X.-W.; Yang, X.-C.; Song, X.-X.; Wang, M.-C.; Chang, J.-B. *J. Org. Chem.* **2014**, *79*, 11690–11699.

S3. Xing, S.-N.; Hua, Y.-Z.; Yang, X.-C.; Du, S.-S.; Jia, S.-K.; Mei, G.-J.; Wang, M.-C. *Org. Lett.* **2022**, *24*, 3909.

## General Procedure for optimization of the reaction conditions

Under the nitrogen atmosphere, a solution of diethylzinc (20  $\mu$ L, 1.0 M in hexane, 0.02 mmol) was added dropwise to a solution of **C** (0.01 mmol) and additives in solvent (2 mL). After the mixture was stirred for 30 min at room temperature. 1-tosylindoline-2,3-diol **1a** and (E)-(2-nitrovinyl)benzene **2a** (0.2 mmol, 29.83 mg) were added. The reaction mixture was stirred for corresponding time at the same temperature. The reaction was quenched with NH<sub>4</sub>Cl solution (4 mL), and the organic layer was extracted with CH<sub>2</sub>Cl<sub>2</sub> (3  $\times$  5 mL). The combined organic layer was washed with brine and dried over Na<sub>2</sub>SO<sub>4</sub>.

The solvent was removed under reduced pressure by using a rotary evaporator. The residue was purified by flash chromatography (DCM/acetone = 50/1) to afford the desired product 3aa and 1a'.

### General Procedure for enantioenriched 3 and 1a'

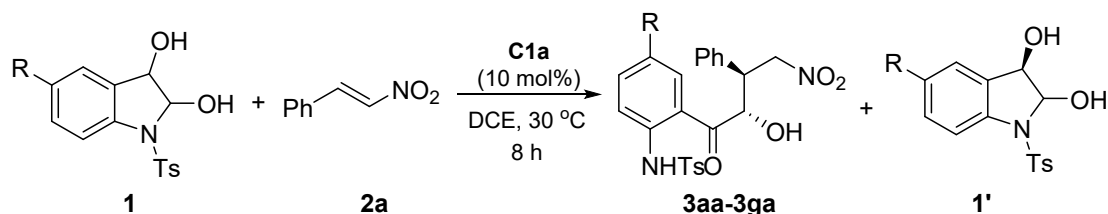

In a flame-dried Schlenk tube, a solution of diethylzinc (40  $\mu$ L, 1.0 mol/L in hexane, 0.04 mmol) was added to a solution of the chiral ligand (*S,S*)-**La** (0.02 mmol 14.1 mg) in dry DCE (2.0 mL) under nitrogen. The mixture was stirred at room temperature for 30 min. Thus, the preparation of **C1a** was finished. Then, **1a** (0.5 mmol, 152.6 mg) and **2a** (0.2 mmol, 29.83 mg) were added. The reaction mixture was stirred for 8 h at 30 °C. The reaction was quenched with  $\text{NH}_4\text{Cl}$  solution (4 mL), and the aqueous layer was extracted with  $\text{CH}_2\text{Cl}_2$  ( $3 \times 5$  mL). The combined organic layer was washed with brine and dried over  $\text{Na}_2\text{SO}_4$ . The solvent was removed under reduced pressure by using a rotary evaporator. The residue was purified by flash chromatography with petroleum DCM/acetone = 50/1 to afford the desired product **3** and **1a'**.

#### *N*-(2-(2-hydroxy-4-nitro-3-phenylbutanoyl)phenyl)-4-methylbenzenesulfonamide (**3aa**):

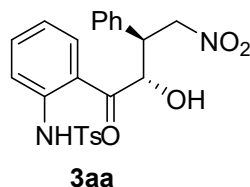

Obtained after purification by column chromatography (DCM/acetone = 50/1) as a white solid (80 mg, 88% yield, 3:1 dr);  $[\alpha]_{\text{D}}^{20} = 50.8$  ( $c = 1.0$ , DCM, 92% ee); **m.p.** = 116.5–118.2 °C; **<sup>1</sup>H NMR** (400 MHz,  $\text{CDCl}_3$ )  $\delta$  10.82 (s, 1H), 7.83–7.75 (m, 3H), 7.52–7.47 (m, 1H), 7.46–7.41 (m, 1H), 7.29–7.26 (m, 2H), 7.26–7.24 (m, 2H), 7.22–7.18 (m, 2H), 5.27 (d,  $J = 3.6$  Hz, 1H), 4.66–4.54 (m, 2H), 3.89 (s, 1H), 3.77–3.71 (m, 1H), 2.36 (s, 3H). **<sup>13</sup>C NMR** (101 MHz,  $\text{CDCl}_3$ )  $\delta$  202.5, 144.6, 140.9, 137.2, 136.3, 136.2, 130.6, 129.9, 129.2, 128.5, 127.9, 127.4, 122.6, 119.3, 118.6, 75.3, 74.8, 48.1, 21.6.; **HRMS** (ESI):  $m/z$   $[\text{M} + \text{Na}]^+$  calcd for  $[\text{C}_{23}\text{H}_{22}\text{N}_2\text{O}_6\text{S}]^+$ : 477.1091, found: 477.1089; **HPLC**: Daicel Chiralpak IE, *n*-hexane/*i*-PrOH = 70/30, flow rate = 1 mL/min,  $\lambda = 254$  nm,  $t_{\text{major}} = 38.752$  min and  $t_{\text{minor}} = 27.727$  min.

#### *N*-(2-(2-hydroxy-4-nitro-3-phenylbutanoyl)-4-methylphenyl)-4-methylbenzenesulfonamide (**3ba**):

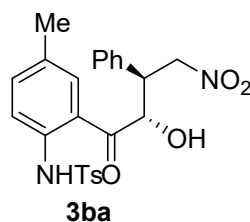

Obtained after purification by column chromatography (DCM/acetone = 50/1) as a pale yellow solid (75 mg, 80% yield, 5:1 dr);  $[\alpha]_D^{20} = 27.4$  ( $c = 1.0$ , DCM, 85% ee); **m.p.** = 107.2–109.5 °C; **<sup>1</sup>H NMR** (400 MHz, CDCl<sub>3</sub>)  $\delta$  10.62 (s, 1H), 7.77 (d,  $J = 8.3$  Hz, 2H), 7.70 (d,  $J = 8.6$  Hz, 1H), 7.31–7.26 (m, 3H), 7.25 (t,  $J = 3.3$  Hz, 4H), 7.14–7.10 (m, 3H), 5.21 (s, 1H), 4.60 (d,  $J = 7.4$  Hz, 2H), 3.84 (d,  $J = 6.4$  Hz, 1H), 3.66 (d,  $J = 4.5$  Hz, 1H), 2.35 (s, 3H), 2.17 (s, 3H); **<sup>13</sup>C NMR** (101 MHz, CDCl<sub>3</sub>)  $\delta$  202.5, 144.4, 138.4, 137.2, 137.1, 136.4, 132.4, 130.9, 129.8, 129.2, 128.4, 127.9, 127.4, 119.8, 118.9, 75.3, 74.9, 48.4, 21.5, 20.5; **HRMS** (ESI):  $m/z$   $[M + Na]^+$  calcd for  $[C_{24}H_{24}N_2O_6S]^+$ : 491.1247, found: 491.1244; **HPLC**: Daicel Chiralpak IE, *n*-hexane/*i*-PrOH = 70/30, flow rate = 1 mL/min,  $\lambda = 254$  nm,  $t_{major} = 36.05$  min and  $t_{minor} = 24.68$  min.

***N*-(2-(2-hydroxy-4-nitro-3-phenylbutanoyl)-4-methoxyphenyl)-4-methylbenzenesulfonamide (3ca):**

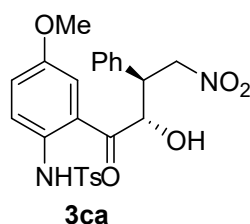

Obtained after purification by column chromatography (DCM/acetone = 50/1) as a yellow solid (87 mg, 90% yield, 10:1 dr);  $[\alpha]_D^{20} = 48.3$  ( $c = 1.0$ , DCM, 99% ee); **m.p.** = 92.5–93.2 °C; **<sup>1</sup>H NMR** (400 MHz, CDCl<sub>3</sub>)  $\delta$  10.24 (s, 1H), 7.79–7.67 (m, 3H), 7.24 (t,  $J = 5.3$  Hz, 5H), 7.19–7.13 (m, 2H), 7.11–7.06 (m, 1H), 6.83 (d,  $J = 2.8$  Hz, 1H), 5.18 (s, 1H), 4.59 (dd,  $J = 13.8, 8.6$  Hz, 1H), 4.47 (dd,  $J = 13.8, 6.2$  Hz, 1H), 3.81 (s, 1H), 3.67 (s, 3H), 2.34 (s, 3H); **<sup>13</sup>C NMR** (101 MHz, CDCl<sub>3</sub>)  $\delta$  202.3, 155.0, 144.5, 137.1, 136.3, 133.7, 129.8, 129.3, 128.4, 127.9, 127.3, 122.4, 122.3, 120.6, 114.8, 75.2, 75.1, 55.9, 48.0, 21.5; **HRMS** (ESI):  $m/z$   $[M + Na]^+$  calcd for  $[C_{24}H_{24}N_2O_7S]^+$ : 507.1196, found: 507.1196; **HPLC**: Daicel Chiralpak IE, *n*-hexane/*i*-PrOH = 70/30, flow rate = 1 mL/min,  $\lambda = 254$  nm,  $t_{major} = 25.07$  min and  $t_{minor} = 23.21$  min.

***N*-(4-fluoro-2-(2-hydroxy-4-nitro-3-phenylbutanoyl)phenyl)-4-methylbenzenesulfonamide (3da):**

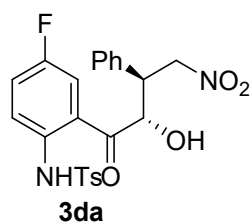

Obtained after purification by column chromatography (DCM/acetone = 50/1) as a yellow solid (78 mg, 83% yield, 10:1 dr);  $[\alpha]_D^{20} = 10.9$  ( $c = 1.0$ , DCM, 99% ee); **m.p.** = 89.8–91.1 °C; **<sup>1</sup>H NMR** (400 MHz, CDCl<sub>3</sub>)  $\delta$  ppm:  $\delta$  10.47 (s, 1H), 7.81–7.73 (m, 3H), 7.28 (s, 1H), 7.26–7.22 (m, 3H), 7.22–7.18 (m, 1H), 7.14–7.09 (m, 2H), 7.03–6.98 (m, 1H), 5.12 (d,  $J = 4.7$  Hz, 1H), 4.74–4.66 (m, 1H), 4.63–4.55 (m, 1H), 3.71–3.64 (m, 1H), 2.37 (s, 3H); **<sup>13</sup>C NMR** (101 MHz, CDCl<sub>3</sub>)  $\delta$  201.9, 157.3 (d,  $J = 245.7$  Hz), 144.8, 136.9, 136.6, 136.1, 129.9, 129.4, 128.7, 127.8, 127.4, 123.6, 123.4, 121.8 (d,  $J = 7.4$  Hz), 120.2, 120.1, 116.6 (d,  $J = 23.9$  Hz), 75.2, 75.1, 48.2, 21.6; **<sup>19</sup>F NMR** (376 MHz, CDCl<sub>3</sub>)  $\delta$  -117.77; **HRMS** (ESI):  $m/z$   $[M + H]^+$  calcd for  $[C_{23}H_{21}FN_2O_6S]^+$ : 473.1177, found: 473.1171; **HPLC**: Daicel Chiralpak IE, *n*-hexane/*i*-PrOH = 70/30, flow rate = 1 mL/min,  $\lambda = 254$  nm,  $t_{major} = 26.59$  min and  $t_{minor} = 21.20$  min.

***N*-(4-chloro-2-(2-hydroxy-4-nitro-3-phenylbutanoyl)phenyl)-4-methylbenzenesulfonamide (3ea):**

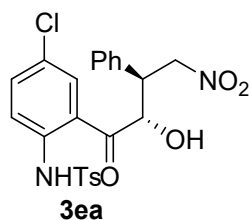

Obtained after purification by column chromatography (DCM/acetone = 50/1) as a yellow solid (81 mg, 83% yield, 5:1 dr);  $[\alpha]_D^{20} = 12.5$  ( $c = 1.0$ , DCM, 99% ee); **m.p.** = 94.2–95.5 °C; **<sup>1</sup>H NMR** (400 MHz, CDCl<sub>3</sub>)  $\delta$  10.63 (s, 1H), 7.79 (d,  $J = 8.3$  Hz, 2H), 7.73 (d,  $J = 9.0$  Hz, 1H), 7.42–7.38 (m, 1H), 7.29 (d,  $J = 8.2$  Hz, 2H), 7.26–7.22 (m, 4H), 7.13–7.08 (m, 2H), 5.14 (s, 1H), 4.79 (dd,  $J = 14.0, 7.0$  Hz, 1H), 4.59 (dd,  $J = 14.0, 7.6$  Hz, 1H), 3.74 (d,  $J = 5.4$  Hz, 1H), 3.71–3.63 (m, 1H), 2.38 (s, 3H). **<sup>13</sup>C NMR** (101 MHz, CDCl<sub>3</sub>)  $\delta$  201.9, 144.8, 139.2, 136.6, 136.0, 135.8, 130.3, 130.0, 129.4, 128.7, 127.9, 127.7, 127.5, 120.6, 119.9, 75.2, 75.0, 48.4, 21.6. **HRMS** (ESI):  $m/z$   $[M + Na]^+$  calcd for  $[C_{23}H_{21}ClN_2O_6S]^+$ : 511.0701, found: 511.0701; **HPLC**: Daicel Chiralpak IE, *n*-hexane/*i*-PrOH = 70/30, flow rate = 1 mL/min,  $\lambda = 254$  nm,  $t_{major} = 31.13$  min and  $t_{minor} = 23.56$  min.

***N*-(4-bromo-2-(2-hydroxy-4-nitro-3-phenylbutanoyl)phenyl)-4-methylbenzenesulfonamide (3fa):**

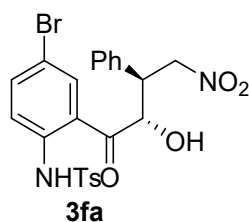

Obtained after purification by column chromatography (DCM/acetone = 50/1) as a pale yellow solid (83 mg, 78% yield, 8:1 dr);  $[\alpha]_D^{20} = 12.0$  ( $c = 1.0$ , DCM, 99% ee); **m.p.** = 88.7–89.9 °C; **<sup>1</sup>H NMR** (400 MHz, CDCl<sub>3</sub>)  $\delta$  10.66 (s, 1H), 7.79 (d,  $J = 8.3$  Hz, 2H), 7.66 (d,  $J = 9.0$  Hz, 1H), 7.54 – 7.50 (m, 1H), 7.40 (d,  $J = 2.2$  Hz, 1H), 7.29 (d,  $J = 8.2$  Hz, 2H), 7.26–7.22 (m, 3H), 7.13–7.08 (m, 2H), 5.14 (s, 1H), 4.82 (dd,  $J = 14.0, 7.0$  Hz, 1H), 4.59 (dd,  $J = 14.0, 7.6$  Hz, 1H), 3.77 (s, 1H), 3.67 (dd,  $J = 12.4, 7.3$  Hz, 1H), 2.38 (s, 3H); **<sup>13</sup>C NMR** (101 MHz, CDCl<sub>3</sub>)  $\delta$  201.9, 144.8, 139.6, 138.6, 136.6, 136.0, 133.3, 130.0, 129.4, 128.7, 127.7, 127.5, 120.7, 120.3, 115.0, 75.2, 75.0, 48.5, 21.6; **HRMS** (ESI):  $m/z$   $[M + Na]^+$  calcd for  $[C_{23}H_{21}BrN_2O_6S]^+$ : 555.0202, found: 555.0207; **HPLC**: Daicel Chiralpak IE, *n*-hexane/*i*-PrOH = 70/30, flow rate = 1 mL/min,  $\lambda = 254$  nm,  $t_{major} = 36.06$  min and  $t_{minor} = 29.94$  min.

***N*-(2-((2S,3S)-2-hydroxy-4-nitro-3-phenylbutanoyl)-5-methoxyphenyl)-4-methylbenzenesulfonamide (3ga):**

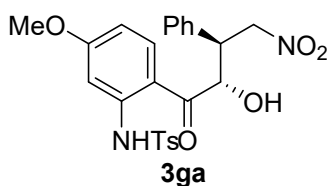

Obtained after purification by column chromatography (DCM/acetone = 50/1) as a white solid (83 mg, 86% yield, 8:1 dr);  $[\alpha]_D^{20} = 24.0$  ( $c = 1.0$ , DCM, 96% ee); **m.p.** = 108.5–109.9 °C; **<sup>1</sup>H NMR** (400 MHz,

DMSO)  $\delta$  11.63 (s, 1H), 8.00 (d,  $J = 9.1$  Hz, 1H), 7.62 (d,  $J = 8.3$  Hz, 2H), 7.35 (d,  $J = 8.1$  Hz, 2H), 7.30–7.26 (m, 2H), 7.20 (d,  $J = 6.4$  Hz, 3H), 6.86 (d,  $J = 2.4$  Hz, 1H), 6.68–6.63 (m, 1H), 6.34 (d,  $J = 7.3$  Hz, 1H), 5.27 (s, 1H), 5.10 (dd,  $J = 13.3, 5.2$  Hz, 1H), 5.01–4.92 (m, 1H), 3.76 (s, 3H), 2.53–2.49 (m, 2H), 2.34 (s, 3H);  $^{13}\text{C NMR}$  (101 MHz,  $\text{CDCl}_3$ )  $\delta$  206.4, 169.4, 149.6, 147.5, 142.1, 140.5, 140.0, 135.3, 133.7, 133.6, 132.7, 132.2, 118.9, 113.6, 107.5, 82.9, 77.9, 61.0, 52.4, 26.2; **HRMS** (ESI):  $m/z$   $[\text{M} + \text{Na}]^+$  calcd for  $[\text{C}_{24}\text{H}_{24}\text{N}_2\text{O}_7\text{S}]^+$ : 507.1196, found: 507.1194; **HPLC**: Daicel Chiralpak IB, *n*-hexane/*i*-PrOH = 70/30, flow rate = 1 mL/min,  $\lambda = 254$  nm,  $t_{\text{major}} = 21.986$  min and  $t_{\text{minor}} = 15.614$  min.

***N*-(2-(3-(4-fluorophenyl)-2-hydroxy-4-nitrobutanoyl)-4-methoxyphenyl)-4-methylbenzenesulfonamide (3cb):**

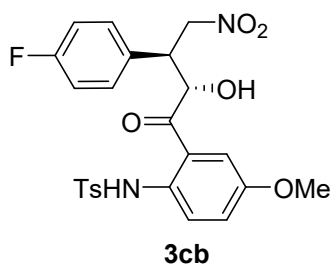

Obtained after purification by column chromatography (DCM/acetone = 50/1) as a pale yellow solid (88 mg, 88% yield, 8:1 dr);  $[\alpha]_{\text{D}}^{20} = 10.4$  ( $c = 1.0$ , DCM, 94% ee); **m.p.** = 83.2–84.5 °C;  $^1\text{H NMR}$  (400 MHz,  $\text{CDCl}_3$ )  $\delta$  10.17 (s, 1H), 7.79–7.69 (m, 3H), 7.24 (d,  $J = 8.1$  Hz, 2H), 7.17–7.09 (m, 3H), 6.95 (t,  $J = 8.6$  Hz, 2H), 6.83 (d,  $J = 2.8$  Hz, 1H), 5.14 (t,  $J = 4.5$  Hz, 1H), 4.55 (dd,  $J = 13.7, 9.1$  Hz, 1H), 4.37 (dd,  $J = 13.8, 5.9$  Hz, 1H), 3.72 (s, 3H), 3.68 (dd,  $J = 8.5, 4.7$  Hz, 1H), 2.34 (s, 3H);  $^{13}\text{C NMR}$  (101 MHz,  $\text{CDCl}_3$ )  $\delta$  202.0, 162.6 (d,  $J = 248.1$  Hz), 155.1, 144.5, 136.4, 133.6, 132.9, 132.9, 129.8, 129.6 (d,  $J = 8.2$  Hz), 127.3, 122.7, 121.9, 120.6, 116.2 (d,  $J = 21.6$  Hz), 115.1, 75.2, 75.1, 55.6, 47.3, 21.5;  $^{19}\text{F NMR}$  (376 MHz,  $\text{CDCl}_3$ )  $\delta$  -113.06; **HRMS** (ESI):  $m/z$   $[\text{M} + \text{Na}]^+$  calcd for  $[\text{C}_{24}\text{H}_{23}\text{FN}_2\text{O}_7\text{S}]^+$ : 525.1102, found: 525.1111; **HPLC**: Daicel Chiralpak IE, *n*-hexane/*i*-PrOH = 70/30, flow rate = 1 mL/min,  $\lambda = 254$  nm,  $t_{\text{major}} = 31.76$  min and  $t_{\text{minor}} = 26.73$  min.

***N*-(2-(3-(4-chlorophenyl)-2-hydroxy-4-nitrobutanoyl)-4-methoxyphenyl)-4-methylbenzenesulfonamide (3cc):**

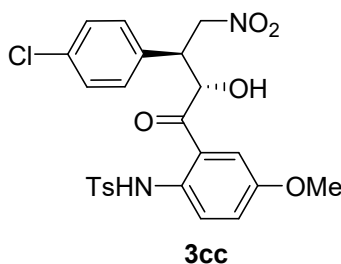

Obtained after purification by column chromatography (DCM/acetone = 50/1) as a yellow solid (97 mg, 93% yield, 6:1 dr);  $[\alpha]_{\text{D}}^{20} = 41.7$  ( $c = 1.0$ , DCM, 93% ee); **m.p.** = 90.2–92.3 °C;  $^1\text{H NMR}$  (400 MHz,  $\text{CDCl}_3$ )  $\delta$  10.13 (s, 1H), 7.78 (d,  $J = 9.2$  Hz, 1H), 7.72 (d,  $J = 8.3$  Hz, 2H), 7.26–7.20 (m, 4H), 7.14–7.10 (m, 1H), 7.08 (d,  $J = 8.5$  Hz, 2H), 6.80 (d,  $J = 2.9$  Hz, 1H), 5.14–5.10 (m, 1H), 4.56 (dd,  $J = 13.8, 9.1$  Hz, 1H), 4.37 (dd,  $J = 13.8, 5.9$  Hz, 1H), 3.78 (d,  $J = 6.1$  Hz, 1H), 3.72 (s, 3H), 2.34 (s, 3H);  $^{13}\text{C NMR}$  (101 MHz,  $\text{CDCl}_3$ )  $\delta$  201.8, 155.1, 144.6, 136.4, 135.5, 134.5, 133.6, 129.8, 129.4, 129.2, 127.3, 122.7, 121.8, 120.6, 115.2, 75.0, 74.9, 55.7, 47.5, 21.5; **HRMS** (ESI):  $m/z$   $[\text{M} + \text{Na}]^+$  calcd for

[C<sub>24</sub>H<sub>23</sub>ClN<sub>2</sub>O<sub>7</sub>S]<sup>+</sup>: 541.0806, found: 541.0801; **HPLC**: Daicel Chiralpak IE, *n*-hexane/*i*-PrOH = 70/30, flow rate = 1 mL/min, λ = 254 nm, t<sub>major</sub> = 31.33 min and t<sub>minor</sub> = 26.18 min.

***N*-(2-(3-(4-bromophenyl)-2-hydroxy-4-nitrobutanoyl)-4-methoxyphenyl)-4-methylbenzenesulfonamide (3cd):**

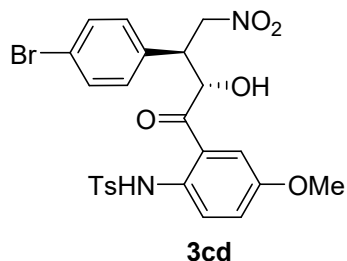

Obtained after purification by column chromatography (DCM/acetone = 50/1) as a pale yellow solid (105 mg, 93% yield, 10:1 dr); [α]<sub>D</sub><sup>20</sup> = 72.7 (c = 1.0, DCM, 99% ee); **m.p.** = 98.2–99.5 °C; **<sup>1</sup>H NMR** (400 MHz, CDCl<sub>3</sub>) δ 10.16 (s, 1H), 7.85–7.66 (m, 3H), 7.36 (d, *J* = 8.4 Hz, 2H), 7.24 (d, *J* = 8.2 Hz, 2H), 7.13–7.08 (m, 1H), 7.00 (d, *J* = 8.4 Hz, 2H), 6.80 (d, *J* = 2.9 Hz, 1H), 5.13 (s, 1H), 4.57 (dd, *J* = 13.8, 9.2 Hz, 1H), 4.41 (dd, *J* = 13.8, 5.8 Hz, 1H), 3.86 (s, 1H), 3.72 (s, 3H), 3.65–3.59 (m, 1H), 2.34 (s, 3H); **<sup>13</sup>C NMR** (101 MHz, CDCl<sub>3</sub>) δ 201.9, 155.1, 144.6, 136.3, 136.0, 133.4, 132.3, 129.8, 129.6, 127.3, 122.6, 122.6, 121.8, 120.8, 115.3, 75.0, 74.8, 55.7, 47.5, 21.5; **HRMS** (ESI): *m/z* [M + Na]<sup>+</sup> calcd for [C<sub>24</sub>H<sub>23</sub>BrN<sub>2</sub>O<sub>7</sub>S]<sup>+</sup>: 585.0301, found: 585.0313; **HPLC**: Daicel Chiralpak IE, *n*-hexane/*i*-PrOH = 70/30, flow rate = 1 mL/min, λ = 254 nm, t<sub>major</sub> = 33.21 min and t<sub>minor</sub> = 27.32 min.

***N*-(2-(2-hydroxy-4-nitro-3-(*p*-tolyl)butanoyl)-4-methoxyphenyl)-4-methylbenzenesulfonamide (3ce):**

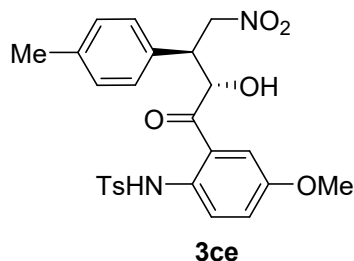

Obtained after purification by column chromatography (DCM/acetone = 50/1) as a pale yellow solid (89 mg, 90% yield, 10:1 dr); [α]<sub>D</sub><sup>20</sup> = 56.4 (c = 1.0, DCM, 99% ee); **m.p.** = 94.6–95.2 °C; **<sup>1</sup>H NMR** (400 MHz, CDCl<sub>3</sub>) δ 10.25 (s, 1H), 7.77–7.67 (m, 3H), 7.23 (d, *J* = 8.2 Hz, 2H), 7.10–6.98 (m, 5H), 6.81 (d, *J* = 2.9 Hz, 1H), 5.15 (s, 1H), 4.57 (dd, *J* = 13.7, 8.7 Hz, 1H), 4.46 (dd, *J* = 13.7, 6.2 Hz, 1H), 3.81 (s, 1H), 3.66 (s, 3H), 2.33 (s, 3H), 2.27 (s, 3H); **<sup>13</sup>C NMR** (101 MHz, CDCl<sub>3</sub>) δ 202.4, 155.0, 144.5, 138.3, 136.3, 134.0, 133.6, 129.9, 129.8, 127.7, 127.3, 122.4, 122.2, 120.7, 114.8, 75.4, 75.3, 55.6, 47.7, 21.5, 21.0; **HRMS** (ESI): *m/z* [M + Na]<sup>+</sup> calcd for [C<sub>25</sub>H<sub>26</sub>N<sub>2</sub>O<sub>7</sub>S]<sup>+</sup>: 521.1353, found: 521.1349; **HPLC**: Daicel Chiralpak IE, *n*-hexane/*i*-PrOH = 70/30, flow rate = 1 mL/min, λ = 254 nm, t<sub>major</sub> = 49.59 min and t<sub>minor</sub> = 37.89 min.

***N*-(2-(2-hydroxy-3-(4-methoxyphenyl)-4-nitrobutanoyl)-4-methoxyphenyl)-4-methylbenzenesulfonamide (3cf):**

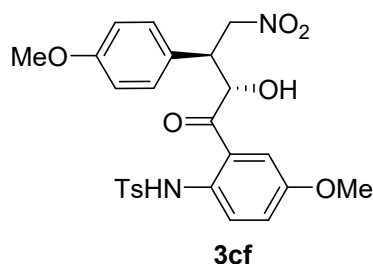

Obtained after purification by column chromatography (DCM/acetone = 50/1) as a yellow solid (98 mg, 95% yield, 6:1 dr);  $[\alpha]_D^{20} = 54.0$  ( $c = 1.0$ , DCM, 95% ee); **m.p.** = 113.6–115.3 °C; **<sup>1</sup>H NMR** (400 MHz, CDCl<sub>3</sub>)  $\delta$  10.23 (s, 1H), 7.78–7.69 (m, 3H), 7.24 (d,  $J = 8.1$  Hz, 2H), 7.11–7.03 (m, 3H), 6.82 (d,  $J = 2.8$  Hz, 1H), 6.76 (d,  $J = 8.6$  Hz, 2H), 5.13 (s, 1H), 4.55 (dd,  $J = 13.6, 8.9$  Hz, 1H), 4.42 (dd,  $J = 13.6, 6.1$  Hz, 1H), 3.75 (s, 3H), 3.69 (s, 3H), 3.62 (s, 1H), 2.34 (s, 3H); **<sup>13</sup>C NMR** (101 MHz, CDCl<sub>3</sub>)  $\delta$  202.4, 159.6, 155.0, 144.5, 136.4, 133.6, 129.8, 129.0, 128.9, 127.3, 122.4, 122.1, 120.6, 115.0, 114.6, 75.5, 75.3, 55.6, 55.3, 47.4, 21.5; **HRMS** (ESI):  $m/z$   $[M + Na]^+$  calcd for  $[C_{25}H_{26}N_2O_8S]^+$ : 537.1302, found: 537.1302; **HPLC**: Daicel Chiralpak IE, *n*-hexane/*i*-PrOH = 70/30, flow rate = 1 mL/min,  $\lambda = 254$  nm,  $t_{major} = 46.05$  min and  $t_{minor} = 39.01$  min.

***N*-(2-(3-(4-(benzyloxy)phenyl)-2-hydroxy-4-nitrobutanoyl)-4-methoxyphenyl)-4-methylbenzenesulfonamide (3cg):**

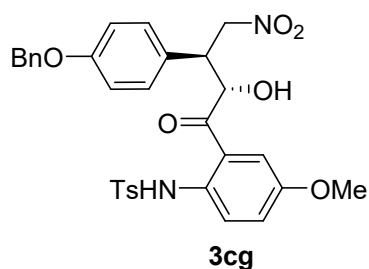

Obtained after purification by column chromatography (DCM/acetone = 50/1) as a pale yellow solid (106 mg, 90% yield, 8:1 dr);  $[\alpha]_D^{20} = 36.0$  ( $c = 1.0$ , DCM, 93% ee); **m.p.** = 108.5–110.2 °C; **<sup>1</sup>H NMR** (400 MHz, CDCl<sub>3</sub>)  $\delta$  10.25 (s, 1H), 7.77–7.68 (m, 3H), 7.42–7.32 (m, 5H), 7.22 (d,  $J = 8.1$  Hz, 2H), 7.10–7.01 (m, 3H), 6.82 (d,  $J = 8.7$  Hz, 3H), 5.14 (s, 1H), 4.99 (s, 2H), 4.55 (dd,  $J = 13.7, 8.9$  Hz, 1H), 4.42 (dd,  $J = 13.7, 6.1$  Hz, 1H), 3.79 (d,  $J = 6.3$  Hz, 1H), 3.66 (s, 3H), 3.62 (dd,  $J = 4.3, 3.1$  Hz, 1H), 2.32 (s, 3H); **<sup>13</sup>C NMR** (101 MHz, CDCl<sub>3</sub>)  $\delta$  202.4, 158.8, 155.0, 144.5, 136.7, 136.3, 133.6, 129.8, 129.1, 129.0, 128.7, 128.1, 127.5, 127.3, 122.4, 122.2, 120.7, 115.5, 114.9, 75.5, 75.3, 70.0, 55.6, 47.4, 21.5; **HRMS** (ESI):  $m/z$   $[M + Na]^+$  calcd for  $[C_{31}H_{30}N_2O_8S]^+$ : 613.1615, found: 613.1615; **HPLC**: Daicel Chiralpak IE, *n*-hexane/*i*-PrOH = 70/30, flow rate = 1 mL/min,  $\lambda = 254$  nm,  $t_{major} = 55.210$  min and  $t_{minor} = 43.414$  min.

***N*-(2-(2-hydroxy-4-nitro-3-(4-(trifluoromethyl)phenyl)butanoyl)-4-methoxyphenyl)-4-methylbenzenesulfonamide (3ch):**



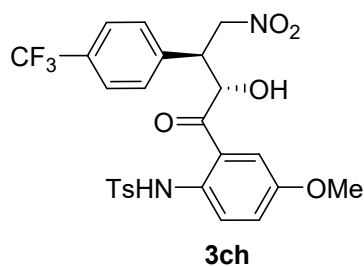

Obtained after purification by column chromatography (DCM/acetone = 50/1) as a pale yellow solid (92 mg, 83% yield, 6:1 dr);  $[\alpha]_D^{20} = 83.7$  ( $c = 1.0$ , DCM, 90% ee); **m.p.** = 68.2–69.5 °C; **<sup>1</sup>H NMR** (400 MHz, CDCl<sub>3</sub>)  $\delta$  10.10 (s, 1H), 7.80–7.70 (m, 3H), 7.50 (d,  $J = 8.1$  Hz, 2H), 7.29 (s, 2H), 7.24 (s, 1H), 7.13–7.08 (m, 1H), 6.79 (d,  $J = 2.8$  Hz, 1H), 5.15 (s, 1H), 4.62 (dd,  $J = 14.0, 9.2$  Hz, 1H), 4.42 (dd,  $J = 14.0, 5.7$  Hz, 1H), 3.84 (d,  $J = 5.9$  Hz, 1H), 3.71 (s, 3H), 2.35 (s, 3H); **<sup>13</sup>C NMR** (101 MHz, CDCl<sub>3</sub>)  $\delta$  201.6, 155.1, 144.6, 141.0, 136.4, 133.5, 129.8, 128.4, 127.3, 126.2, 126.1, 122.8, 121.7, 120.7, 115.3, 74.8, 74.6, 55.6, 47.8, 21.5; **<sup>19</sup>F NMR** (376 MHz, CDCl<sub>3</sub>)  $\delta$  -62.87; **HRMS** (ESI):  $m/z$   $[M + Na]^+$  calcd for  $[C_{25}H_{23}F_3N_2O_7S]^+$ : 575.1070, found: 575.1074; **HPLC**: Daicel Chiralpak IE, *n*-hexane/*i*-PrOH = 70/30, flow rate = 1 mL/min,  $\lambda = 254$  nm,  $t_{major} = 24.15$  min and  $t_{minor} = 21.58$  min.

***N*-(2-(3-(3-chlorophenyl)-2-hydroxy-4-nitrobutanoyl)-4-methoxyphenyl)-4-methylbenzenesulfonamide (3ci):**

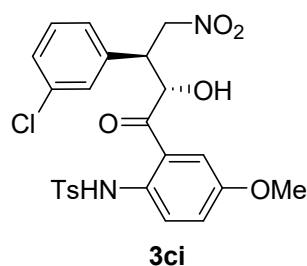

Obtained after purification by column chromatography (DCM/acetone = 50/1) as a yellow solid (88 mg, 85% yield, 4:1 dr);  $[\alpha]_D^{20} = 36.4$  ( $c = 1.0$ , DCM, 96% ee); **m.p.** = 79.5–81.3 °C; **<sup>1</sup>H NMR** (400 MHz, DMSO)  $\delta$  10.23 (s, 1H), 7.50 (d,  $J = 7.9$  Hz, 2H), 7.44 (s, 1H), 7.34–7.22 (m, 5H), 7.18 (s, 1H), 7.07–6.96 (m, 2H), 6.20 (s, 1H), 5.34 (s, 1H), 5.08–4.89 (m, 2H), 3.85 (s, 1H), 3.73 (s, 3H), 2.51 (s, 3H), 2.34 (s, 3H); **<sup>13</sup>C NMR** (101 MHz, DMSO)  $\delta$  202.6, 156.4, 144.1, 140.6, 136.2, 133.5, 130.7, 130.2, 129.5, 128.6, 128., 127.8, 127.4, 124.3, 120.3, 115.8, 77.1, 74.6, 56.0, 46.7, 21.5; **HRMS** (ESI):  $m/z$   $[M + Na]^+$  calcd for  $[C_{24}H_{23}ClN_2O_7S]^+$ : 541.0806, found: 541.0817; **HPLC**: Daicel Chiralpak IE, *n*-hexane/*i*-PrOH = 70/30, flow rate = 1 mL/min,  $\lambda = 254$  nm,  $t_{major} = 21.26$  min and  $t_{minor} = 19.47$  min.

***N*-(2-(3-(3-bromophenyl)-2-hydroxy-4-nitrobutanoyl)-4-methoxyphenyl)-4-methylbenzenesulfonamide (3cj):**

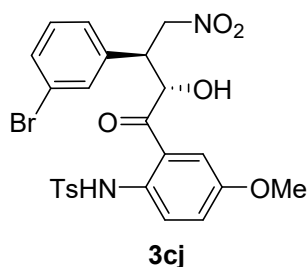

Obtained after purification by column chromatography (DCM/acetone = 50/1) as a yellow solid (99 mg, 88% yield, 4:1 dr);  $[\alpha]_D^{20} = 37.6$  ( $c = 1.0$ , DCM, 85% ee); **m.p.** = 113.7–115.1 °C; **<sup>1</sup>H NMR** (400 MHz, CDCl<sub>3</sub>)  $\delta$  10.13 (s, 1H), 7.77 (d,  $J = 9.2$  Hz, 1H), 7.72 (d,  $J = 8.2$  Hz, 2H), 7.40 (d,  $J = 7.3$  Hz, 1H), 7.32 (s, 1H), 7.24 (d,  $J = 8.2$  Hz, 2H), 7.17–7.10 (m, 3H), 6.82 (d,  $J = 2.8$  Hz, 1H), 5.15 (s, 1H), 4.55 (dd,  $J = 14.0, 8.8$  Hz, 1H), 4.40 (dd,  $J = 14.0, 6.0$  Hz, 1H), 3.83 (s, 1H), 3.72 (s, 3H), 3.63 (dd,  $J = 9.0, 3.8$  Hz, 1H), 2.34 (s, 3H); **<sup>13</sup>C NMR** (101 MHz, CDCl<sub>3</sub>)  $\delta$  201.7, 155.1, 144.5, 139.5, 136.3, 133.6, 131.7, 131.0, 130.8, 129.8, 127.3, 126.6, 123.2, 122.8, 122.4, 120.6, 114.6, 74.9, 55.6, 47.5, 21.5; **HRMS** (ESI):  $m/z$   $[M + Na]^+$  calcd for [C<sub>24</sub>H<sub>23</sub>BrN<sub>2</sub>O<sub>7</sub>S]<sup>+</sup>: 585.0301, found: 585.0300; **HPLC**: Daicel Chiralpak IB, *n*-hexane/*i*-PrOH = 70/30, flow rate = 1 mL/min,  $\lambda = 254$  nm,  $t_{major} = 15.07$  min and  $t_{minor} = 12.87$  min.

***N*-(2-(2-hydroxy-4-nitro-3-(*m*-tolyl)butanoyl)-4-methoxyphenyl)-4-methylbenzenesulfonamide (3ck):**

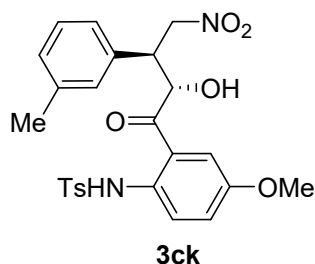

Obtained after purification by column chromatography (DCM/acetone = 50/1) as a yellow solid (95 mg, 95% yield, 7:1 dr);  $[\alpha]_D^{20} = 49.0$  ( $c = 1.0$ , DCM, 90% ee); **m.p.** = 128.8–129.7 °C; **<sup>1</sup>H NMR** (400 MHz, CDCl<sub>3</sub>)  $\delta$  10.24 (s, 1H), 7.79–7.70 (m, 3H), 7.24 (d,  $J = 8.1$  Hz, 2H), 7.14 (t,  $J = 7.9$  Hz, 1H), 7.11–7.03 (m, 2H), 6.95 (s, 2H), 6.81 (d,  $J = 2.8$  Hz, 1H), 5.16 (s, 1H), 4.57 (dd,  $J = 13.8, 8.5$  Hz, 1H), 4.48 (dd,  $J = 13.8, 6.4$  Hz, 1H), 3.79 (d,  $J = 6.1$  Hz, 1H), 3.66 (s, 3H), 2.34 (s, 3H), 2.27 (s, 3H); **<sup>13</sup>C NMR** (101 MHz, CDCl<sub>3</sub>)  $\delta$  202.3, 154.9, 144.4, 139.0, 137.1, 136.3, 133.7, 129.8, 129.2, 129.1, 128.6, 127.3, 124.8, 122.3, 120.5, 114.7, 75.2, 75.2, 55.5, 47.9, 21.5, 21.4; **HRMS** (ESI):  $m/z$   $[M + Na]^+$  calcd for [C<sub>25</sub>H<sub>26</sub>N<sub>2</sub>O<sub>7</sub>S]<sup>+</sup>: 521.1353, found: 521.1348; **HPLC**: Daicel Chiralpak IB, *n*-hexane/*i*-PrOH = 70/30, flow rate = 1 mL/min,  $\lambda = 254$  nm,  $t_{major} = 12.51$  min and  $t_{minor} = 11.03$  min.

***N*-(2-(2-hydroxy-3-(3-methoxyphenyl)-4-nitrobutanoyl)-4-methoxyphenyl)-4-methylbenzenesulfonamide (3cl):**

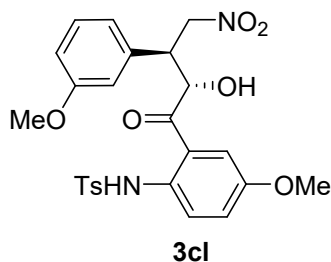

Obtained after purification by column chromatography (DCM/acetone = 50/1) as a pale yellow solid (88 mg, 86% yield, 3:1 dr);  $[\alpha]_D^{20} = 44.4$  ( $c = 1.0$ , DCM, 98% ee); **m.p.** = 119.1–120.3 °C; **<sup>1</sup>H NMR** (400 MHz, CDCl<sub>3</sub>)  $\delta$  10.26 (s, 1H), 7.75–7.68 (m, 3H), 7.23 (d,  $J = 7.9$  Hz, 2H), 7.15 (t,  $J = 8.2$  Hz, 1H), 7.11–7.05 (m, 1H), 6.86 (d,  $J = 2.0$  Hz, 1H), 6.78 (s, 2H), 6.71 (d,  $J = 7.5$  Hz, 1H), 5.19 (s, 1H), 4.58 (dd,  $J = 13.8, 8.4$  Hz, 1H), 4.49 (dd,  $J = 13.8, 6.3$  Hz, 1H), 3.85 (s, 1H), 3.75 (s, 3H), 3.68 (s, 3H), 2.34 (s, 3H); **<sup>13</sup>C NMR** (101 MHz, CDCl<sub>3</sub>)  $\delta$  202.3, 160.1, 155.0, 144.5, 138.7, 136.2, 133.6, 130.3, 129.8, 127.3,

122.4, 122.3, 120.6, 120.1, 114.7, 113.8, 113.6, 75.2, 75.1, 55.6, 55.3, 47.9, 21.5; **HRMS** (ESI):  $m/z$   $[M + Na]^+$  calcd for  $[C_{25}H_{26}N_2O_8S]^+$ : 537.1302, found: 537.1302; **HPLC**: Daicel Chiralpak IE, *n*-hexane/*i*-PrOH = 70/30, flow rate = 1 mL/min,  $\lambda$  = 254 nm,  $t_{major}$  = 56.56 min and  $t_{minor}$  = 47.95 min.

***N*-(2-(3-(2-chlorophenyl)-2-hydroxy-4-nitrobutanoyl)-4-methoxyphenyl)-4-methylbenzenesulfonamide (3cm):**

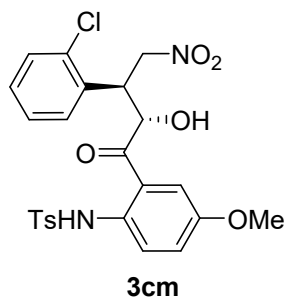

Obtained after purification by column chromatography (DCM/acetone = 50/1) as a yellow solid (93 mg, 90% yield, 5:1 dr);  $[\alpha]_D^{20}$  = 49.3 (c = 1.0, DCM, 98% ee); **m.p.** = 98.2–99.6 °C; **<sup>1</sup>H NMR** (400 MHz, CDCl<sub>3</sub>)  $\delta$  10.16 (s, 1H), 7.71 (d,  $J$  = 9.0 Hz, 1H), 7.62 (t,  $J$  = 16.3 Hz, 2H), 7.35 (s, 1H), 7.29 (d,  $J$  = 9.2 Hz, 1H), 7.19 (s, 1H), 7.16 (s, 2H), 7.14 (s, 1H), 7.11–7.04 (m, 2H), 5.17 (s, 1H), 4.50 (dd,  $J$  = 13.8, 8.4 Hz, 1H), 4.34 (s, 1H), 4.14 (dd,  $J$  = 13.5, 5.6 Hz, 1H), 3.81 (s, 1H), 3.67 (s, 3H), 2.26 (s, 3H); **<sup>13</sup>C NMR** (101 MHz, CDCl<sub>3</sub>)  $\delta$  201.9, 155.1, 144.5, 136.3, 134.4, 133.7, 133.5, 130.1, 129.8, 129.6, 127.7, 127.3, 122.7, 122.3, 120.4, 115.0, 73.4, 55.7, 43.6, 21.5; **HRMS** (ESI):  $m/z$   $[M + Na]^+$  calcd for  $[C_{24}H_{23}ClN_2O_7S]^+$ : 541.0806, found: 541.0809; **HPLC**: Daicel Chiralpak IE, *n*-hexane/*i*-PrOH = 70/30, flow rate = 1 mL/min,  $\lambda$  = 254 nm,  $t_{major}$  = 49.03 min and  $t_{minor}$  = 41.04 min.

***N*-(2-(3-(2-bromophenyl)-2-hydroxy-4-nitrobutanoyl)-4-methoxyphenyl)-4-methylbenzenesulfonamide (3cn):**

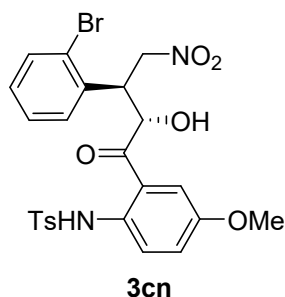

Obtained after purification by column chromatography (DCM/acetone = 50/1) as a pale yellow solid (98 mg, 87% yield, 3:1 dr);  $[\alpha]_D^{20}$  = 48.3 (c = 1.0, DCM, 94% ee); **m.p.** = 95.2–93.0 °C; **<sup>1</sup>H NMR** (400 MHz, DMSO)  $\delta$  10.11 (s, 1H), 7.55 (t,  $J$  = 8.4 Hz, 2H), 7.49 (d,  $J$  = 8.1 Hz, 2H), 7.31 (d,  $J$  = 8.0 Hz, 3H), 7.22 (s, 1H), 7.14 (t,  $J$  = 7.3 Hz, 1H), 7.00 (d,  $J$  = 8.9 Hz, 1H), 6.93 (d,  $J$  = 8.9 Hz, 1H), 6.11 (s, 1H), 5.34 (s, 1H), 5.03–4.92 (m, 2H), 4.38 (dd,  $J$  = 14.2, 6.5 Hz, 1H), 3.73 (s, 3H), 2.34 (s, 3H); **<sup>13</sup>C NMR** (101 MHz, DMSO)  $\delta$  202.9, 156.4, 144.1, 137.1, 136.2, 133.3, 130.1, 130.0, 129.8, 128.3, 127.4, 124.9, 124.6, 120.1, 115.6, 76.6, 74.6, 56.0, 45.3, 21.4; **HRMS** (ESI):  $m/z$   $[M + Na]^+$  calcd for  $[C_{24}H_{23}BrN_2O_7S]^+$ : 585.0301, found: 585.0304; **HPLC**: Daicel Chiralpak IE, *n*-hexane/*i*-PrOH = 70/30, flow rate = 1 mL/min,  $\lambda$  = 254 nm,  $t_{major}$  = 30.96 min and  $t_{minor}$  = 23.51 min.

***N*-(2-(2-hydroxy-4-nitro-3-(*o*-tolyl)butanoyl)-4-methoxyphenyl)-4-methylbenzenesulfonamide (3co):**

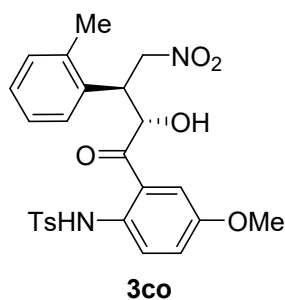

Obtained after purification by column chromatography (DCM/acetone = 50/1) as a yellow solid (83 mg, 83% yield, 10:1 dr);  $[\alpha]_D^{20} = 22.7$  ( $c = 1.0$ , DCM, 99% ee); **m.p.** = 89.9–91.3 °C; **<sup>1</sup>H NMR** (400 MHz, CDCl<sub>3</sub>)  $\delta$  10.25 (s, 1H), 7.71 (t,  $J = 9.1$  Hz, 3H), 7.46 (d,  $J = 7.7$  Hz, 1H), 7.22 (d,  $J = 8.0$  Hz, 3H), 7.13 (t,  $J = 7.4$  Hz, 1H), 7.08–7.03 (m, 2H), 6.77 (d,  $J = 2.9$  Hz, 1H), 5.17 (s, 1H), 4.62 (dd,  $J = 13.9, 7.1$  Hz, 1H), 4.48 (dd,  $J = 13.9, 7.7$  Hz, 1H), 4.05 (dd,  $J = 12.3, 7.4$  Hz, 1H), 3.79 (s, 1H), 3.59 (s, 3H), 2.35 (s, 3H), 2.08 (s, 3H); **<sup>13</sup>C NMR** (101 MHz, CDCl<sub>3</sub>)  $\delta$  202.5, 154.7, 144.3, 136.3, 136.1, 135.4, 133.8, 131.1, 129.8, 128.2, 127.3, 127.2, 127.1, 122.1, 121.8, 120.4, 115.1, 75.4, 74.7, 55.5, 42.7, 21.5, 19.4; **HRMS** (ESI):  $m/z$   $[M + Na]^+$  calcd for [C<sub>25</sub>H<sub>26</sub>N<sub>2</sub>O<sub>7</sub>S]<sup>+</sup>: 521.1353, found: 521.1350; **HPLC**: Daicel Chiralpak IE, *n*-hexane/*i*-PrOH = 70/30, flow rate = 1 mL/min,  $\lambda = 254$  nm,  $t_{\text{major}} = 33.82$  min and  $t_{\text{minor}} = 27.24$  min.

***N*-(2-(2-hydroxy-3-(2-methoxyphenyl)-4-nitrobutanoyl)-4-methoxyphenyl)-4-methylbenzenesulfonamide (3cp):**

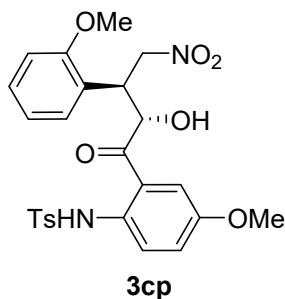

Obtained after purification by column chromatography (DCM/acetone = 50/1) as a yellow solid (90 mg, 88% yield, 10:1 dr);  $[\alpha]_D^{20} = 29.6$  ( $c = 1.0$ , DCM, 94% ee); **m.p.** = 95.3–96.8 °C; **<sup>1</sup>H NMR** (400 MHz, CDCl<sub>3</sub>)  $\delta$  10.31 (s, 1H), 7.71 (t,  $J = 8.9$  Hz, 3H), 7.28 (d,  $J = 2.8$  Hz, 1H), 7.24–7.18 (m, 3H), 7.08–7.04 (m, 1H), 6.94 (d,  $J = 7.5$  Hz, 1H), 6.84–6.77 (m, 2H), 5.24 (s, 1H), 4.73 (dd,  $J = 13.8, 8.7$  Hz, 1H), 4.38 (d,  $J = 6.1$  Hz, 1H), 4.16 (s, 1H), 3.89 (s, 3H), 3.73 (s, 3H), 3.66 (d,  $J = 6.4$  Hz, 1H), 2.33 (s, 3H); **<sup>13</sup>C NMR** (101 MHz, CDCl<sub>3</sub>)  $\delta$  203.1, 156.5, 154.8, 144.4, 136.5, 133.3, 129.8, 129.3, 128.6, 127.3, 124.4, 121.8, 121.1, 121.0, 120.6, 117.4, 110.9, 73.7, 73.3, 55.7, 55.4, 42.9, 21.5; **HRMS** (ESI):  $m/z$   $[M + Na]^+$  calcd for [C<sub>25</sub>H<sub>26</sub>N<sub>2</sub>O<sub>8</sub>S]<sup>+</sup>: 537.1302, found: 537.1306; **HPLC**: Daicel Chiralpak IB, *n*-hexane/*i*-PrOH = 70/30, flow rate = 1 mL/min,  $\lambda = 254$  nm,  $t_{\text{major}} = 14.19$  min and  $t_{\text{minor}} = 13.02$  min.

***N*-(2-(3-(3,4-dichlorophenyl)-2-hydroxy-4-nitrobutanoyl)-4-methoxyphenyl)-4-methylbenzenesulfonamide (3cq):**

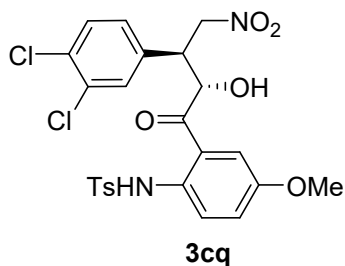

Obtained after purification by column chromatography (DCM/acetone = 50/1) as a orange solid (92 mg, 83% yield, 5:1 dr);  $[\alpha]_D^{20} = 49.7$  ( $c = 1.0$ , DCM, 93% ee); **m.p.** = 84.9–86.5 °C;  $^1\text{H NMR}$  (400 MHz,  $\text{CDCl}_3$ )  $\delta$  10.05 (s, 1H), 7.77 (d,  $J = 9.2$  Hz, 1H), 7.72 (d,  $J = 8.2$  Hz, 2H), 7.33 (d,  $J = 8.3$  Hz, 1H), 7.26–7.19 (m, 3H), 7.16–7.10 (m, 1H), 7.03–6.99 (m, 1H), 6.79 (d,  $J = 2.8$  Hz, 1H), 5.12 (s, 1H), 4.55 (dd,  $J = 13.9, 9.3$  Hz, 1H), 4.36 (dd,  $J = 13.9, 5.7$  Hz, 1H), 3.86 (s, 1H), 3.74 (s, 3H), 3.63–3.55 (m, 1H), 2.34 (s, 3H);  $^{13}\text{C NMR}$  (101 MHz,  $\text{CDCl}_3$ )  $\delta$  201.5, 155.2, 144.6, 137.3, 136.3, 133.4, 133.3, 132.9, 131.2, 130.0, 129.9, 127.3, 127.2, 123.0, 121.8, 120.8, 115.1, 74.8, 74.7, 55.7, 47.1, 21.5; **HRMS** (ESI):  $m/z$   $[\text{M} + \text{Na}]^+$  calcd for  $[\text{C}_{24}\text{H}_{22}\text{Cl}_2\text{N}_2\text{O}_7\text{S}]^+$ : 575.0417, found: 575.0420; **HPLC**: Daicel Chiralpak IE, *n*-hexane/*i*-PrOH = 70/30, flow rate = 1 mL/min,  $\lambda = 254$  nm,  $t_{\text{major}} = 28.162$  min and  $t_{\text{minor}} = 25.732$  min.

***N*-(2-(3-(3-bromo-4-chlorophenyl)-2-hydroxy-4-nitrobutanoyl)-4-methoxyphenyl)-4-methylbenzenesulfonamide (3cr):**

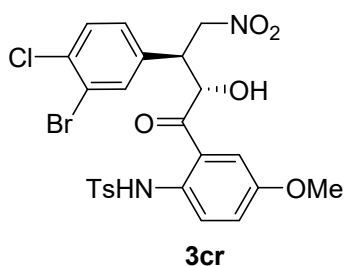

Obtained after purification by column chromatography (DCM/acetone = 50/1) as a yellow solid (99 mg, 83% yield, 7:1 dr);  $[\alpha]_D^{20} = 5.8$  ( $c = 1.0$ , DCM, 80% ee); **m.p.** = 78.4–80.0 °C;  $^1\text{H NMR}$  (400 MHz,  $\text{CDCl}_3$ )  $\delta$  10.04 (s, 1H), 7.78 (d,  $J = 9.2$  Hz, 1H), 7.72 (d,  $J = 8.3$  Hz, 2H), 7.38 (d,  $J = 2.0$  Hz, 1H), 7.33 (d,  $J = 8.3$  Hz, 1H), 7.23 (s, 2H), 7.15–7.10 (m, 1H), 7.08–7.04 (m, 1H), 6.77 (d,  $J = 2.8$  Hz, 1H), 5.11 (s, 1H), 4.54 (dd,  $J = 13.9, 9.2$  Hz, 1H), 4.36 (dd,  $J = 14.0, 5.7$  Hz, 1H), 3.83 (d,  $J = 5.9$  Hz, 1H), 3.74 (s, 3H), 3.60–3.54 (m, 1H), 2.34 (s, 3H);  $^{13}\text{C NMR}$  (101 MHz,  $\text{CDCl}_3$ )  $\delta$  201.4, 155.2, 144.6, 137.4, 136.3, 133.4, 133.2, 131.0, 129.8, 127.9, 127.3, 123.0, 121.9, 120.7, 115.0, 74.8, 74.7, 55.7, 47.0, 21.5; **HRMS** (ESI):  $m/z$   $[\text{M} + \text{Na}]^+$  calcd for  $[\text{C}_{24}\text{H}_{22}\text{BrClN}_2\text{O}_7\text{S}]^+$ : 618.9912, found: 618.9909; **HPLC**: Daicel Chiralpak IE, *n*-hexane/*i*-PrOH = 70/30, flow rate = 1 mL/min,  $\lambda = 254$  nm,  $t_{\text{major}} = 24.404$  min and  $t_{\text{minor}} = 23.146$  min.

***N*-(2-(3-(3,4-dimethylphenyl)-2-hydroxy-4-nitrobutanoyl)-4-methoxyphenyl)-4-methylbenzenesulfonamide (3cs):**

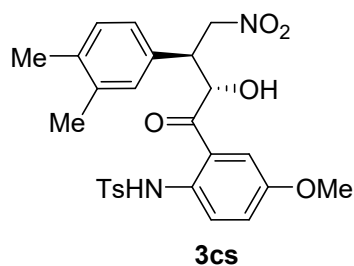

Obtained after purification by column chromatography (DCM/acetone = 50/1) as a pale yellow solid (82 mg, 80% yield, 7:1 dr);  $[\alpha]_D^{20} = 25.9$  ( $c = 1.0$ , DCM, 90% ee); **m.p.** = 105.5–106.2 °C; **<sup>1</sup>H NMR** (400 MHz, CDCl<sub>3</sub>)  $\delta$  10.24 (s, 1H), 7.78–7.70 (m, 3H), 7.23 (d,  $J = 8.0$  Hz, 2H), 7.10–7.06 (m, 1H), 7.00 (d,  $J = 7.7$  Hz, 1H), 6.90–6.84 (m, 2H), 6.79 (d,  $J = 2.9$  Hz, 1H), 5.16–5.10 (m, 1H), 4.56 (dd,  $J = 13.8, 8.6$  Hz, 1H), 4.45 (dd,  $J = 13.8, 6.4$  Hz, 1H), 3.75 (d,  $J = 6.2$  Hz, 1H), 3.66 (s, 3H), 2.34 (s, 3H), 2.19 (s, 3H), 2.17 (s, 3H); **<sup>13</sup>C NMR** (101 MHz, CDCl<sub>3</sub>)  $\delta$  202.4, 154.9, 144.4, 137.6, 137.0, 136.4, 134.5, 133.7, 130.4, 129.8, 129.0, 127.3, 125.1, 122.3, 122.27, 120.5, 114.7, 75.4, 75.3, 55.5, 47.7, 21.5, 19.7, 19.4; **HRMS** (ESI):  $m/z$   $[M + Na]^+$  calcd for  $[C_{26}H_{28}N_2O_7S]^+$ : 535.1509, found: 535.1516; **HPLC**: Daicel Chiralpak IB, *n*-hexane/*i*-PrOH = 70/30, flow rate = 1 mL/min,  $\lambda = 254$  nm,  $t_{major} = 12.65$  min and  $t_{minor} = 11.63$  min.

***N*-(2-(3-(2,4-dimethoxyphenyl)-2-hydroxy-4-nitrobutanoyl)-4-methoxyphenyl)-4-methylbenzenesulfonamide (3ct):**

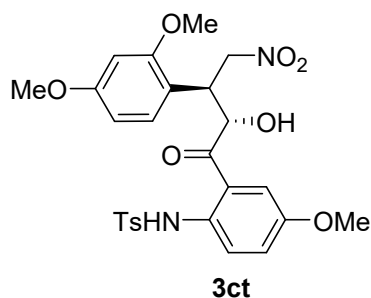

Obtained after purification by column chromatography (DCM/acetone = 50/1) as a deep yellow solid (93 mg, 85% yield, 5:1 dr);  $[\alpha]_D^{20} = 46.8$  ( $c = 1.0$ , DCM, 99% ee); **m.p.** = 76.9–78.2 °C; **<sup>1</sup>H NMR** (400 MHz, CDCl<sub>3</sub>)  $\delta$  10.28 (s, 1H), 7.75–7.68 (m, 3H), 7.22 (d,  $J = 7.6$  Hz, 3H), 7.08–7.03 (m, 1H), 6.81 (d,  $J = 8.4$  Hz, 1H), 6.37 (d,  $J = 2.3$  Hz, 1H), 6.29 (d,  $J = 8.4$  Hz, 1H), 5.20 (s, 1H), 4.71 (dd,  $J = 13.6, 8.9$  Hz, 1H), 4.35 (dd,  $J = 13.6, 6.0$  Hz, 1H), 4.04 (s, 1H), 3.85 (s, 3H), 3.74 (d,  $J = 0.7$  Hz, 6H), 3.60 (d,  $J = 6.5$  Hz, 1H), 2.33 (s, 3H); **<sup>13</sup>C NMR** (101 MHz, CDCl<sub>3</sub>)  $\delta$  203.3, 160.7, 157.6, 154.8, 144.3, 136.5, 133.2, 129.7, 129.3, 127.3, 121.7, 121.1, 120.4, 117.5, 116.5, 104.6, 99.0, 74.0, 73.5, 55.7, 55.4, 42.9, 21.5; **HRMS** (ESI):  $m/z$   $[M + Na]^+$  calcd for  $[C_{26}H_{28}N_2O_9S]^+$ : 567.1408, found: 567.1419; **HPLC**: Daicel Chiralpak IE, *n*-hexane/*i*-PrOH = 70/30, flow rate = 1 mL/min,  $\lambda = 254$  nm,  $t_{major} = 59.23$  min.

***N*-(2-(3-(benzo[d][1,3]dioxol-5-yl)-2-hydroxy-4-nitrobutanoyl)-4-methoxyphenyl)-4-methylbenzenesulfonamide (3cu):**

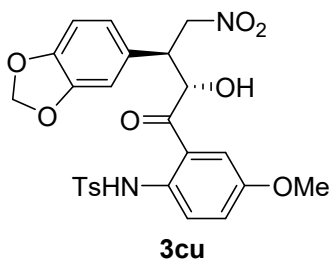

Obtained after purification by column chromatography (DCM/acetone = 50/1) as a yellow solid (95 mg, 90% yield, 6:1 dr);  $[\alpha]_D^{20} = 33.6$  ( $c = 1.0$ , DCM, 91% ee); **m.p.** = 95.4–96.5 °C; **<sup>1</sup>H NMR** (400 MHz, CDCl<sub>3</sub>)  $\delta$  10.21 (s, 1H), 7.76 (d,  $J = 9.2$  Hz, 1H), 7.71 (d,  $J = 8.3$  Hz, 2H), 7.23 (d,  $J = 8.1$  Hz, 2H), 7.13–7.08 (m, 1H), 6.85 (d,  $J = 2.8$  Hz, 1H), 6.70 (d,  $J = 1.5$  Hz, 1H), 6.61 (d,  $J = 8.0$  Hz, 1H), 6.52–6.48 (m, 1H), 5.92 (s, 2H), 5.13 (d,  $J = 1.3$  Hz, 1H), 4.53 (dd,  $J = 13.6, 9.0$  Hz, 1H), 4.39 (dd,  $J = 13.7, 6.0$  Hz, 1H), 3.79 (s, 1H), 3.71 (s, 3H), 3.60–3.54 (m, 1H), 2.34 (s, 3H); **<sup>13</sup>C NMR** (101 MHz, CDCl<sub>3</sub>)  $\delta$  202.2, 155.0, 148.3, 147.7, 144.5, 136.3, 133.6, 130.6, 129.8, 127.3, 122.5, 122.2, 121.5, 120.7, 114.9, 108.7, 107.9, 101.4, 75.5, 75.3, 55.6, 47.8, 21.5; **HRMS** (ESI):  $m/z$   $[M + Na]^+$  calcd for  $[C_{25}H_{24}N_2O_9S]^+$ : 551.1095, found: 551.1092; **HPLC**: Daicel Chiralpak IE, *n*-hexane/*i*-PrOH = 70/30, flow rate = 1 mL/min,  $\lambda = 254$  nm,  $t_{major} = 51.47$  min and  $t_{minor} = 43.07$  min.

***N*-(2-(2-hydroxy-3-(naphthalen-2-yl)-4-nitrobutanoyl)-4-methoxyphenyl)-4-methylbenzenesulfonamide (3cv):**

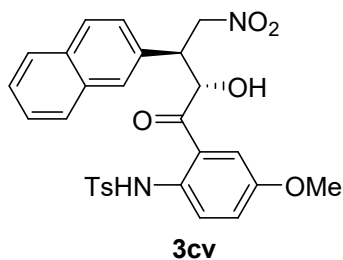

Obtained after purification by column chromatography (DCM/acetone = 50/1) as a pale orange solid (99 mg, 93% yield, 8:1 dr);  $[\alpha]_D^{20} = 74.5$  ( $c = 1.0$ , DCM, 92% ee); **m.p.** = 110.2–111.9 °C; **<sup>1</sup>H NMR** (400 MHz, CDCl<sub>3</sub>)  $\delta$  10.22 (s, 1H), 7.78–7.68 (m, 6H), 7.54 (s, 1H), 7.50–7.45 (m, 2H), 7.32–7.27 (m, 1H), 7.24 (d,  $J = 8.2$  Hz, 2H), 7.01–6.95 (m, 1H), 6.78 (d,  $J = 2.7$  Hz, 1H), 5.25 (s, 1H), 4.70 (dd,  $J = 13.8, 8.7$  Hz, 1H), 4.58 (dd,  $J = 13.9, 6.2$  Hz, 1H), 3.89 (s, 1H), 3.85–3.79 (m, 1H), 3.50 (s, 3H), 2.33 (s, 3H); **<sup>13</sup>C NMR** (101 MHz, CDCl<sub>3</sub>)  $\delta$  202.2, 154.9, 144.5, 136.3, 134.5, 133.5, 133.3, 133.0, 129.8, 129.3, 127.8, 127.7, 127.4, 127.3, 126.7, 126.6, 125.1, 122.4, 122.1, 120.7, 114.9, 75., 75.2, 55.4, 48.1, 21.5; **HRMS** (ESI):  $m/z$   $[M + Na]^+$  calcd for  $[C_{28}H_{26}N_2O_7S]^+$ : 557.1353, found: 557.1356; **HPLC**: Daicel Chiralpak IE, *n*-hexane/*i*-PrOH = 70/30, flow rate = 1 mL/min,  $\lambda = 254$  nm,  $t_{major} = 47.440$  min and  $t_{minor} = 39.195$  min.

***N*-(2-(2-hydroxy-3-(naphthalen-1-yl)-4-nitrobutanoyl)-4-methoxyphenyl)-4-methylbenzenesulfonamide (3cw):**

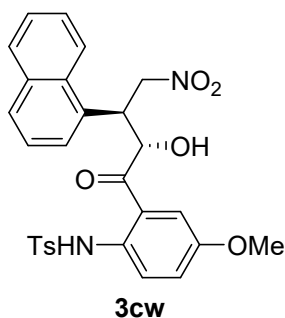

Obtained after purification by column chromatography (DCM/acetone = 50/1) as a pale yellow solid (102 mg, 96% yield, 10:1 dr);  $[\alpha]_D^{20} = 8.0$  ( $c = 1.0$ , DCM, 89% ee); **m.p.** = 102.7–103.4 °C; **<sup>1</sup>H NMR** (400 MHz, CDCl<sub>3</sub>)  $\delta$  10.24 (s, 1H), 7.92–7.74 (m, 6H), 7.68 (d,  $J = 9.2$  Hz, 1H), 7.51 (s, 3H), 7.29–7.24 (m, 2H), 7.04 (d,  $J = 8.1$  Hz, 1H), 6.83 (s, 1H), 5.34 (s, 1H), 4.80 (s, 1H), 4.65 (s, 2H), 4.01 (s, 1H), 3.39 (s, 3H), 2.36 (s, 3H); **<sup>13</sup>C NMR** (101 MHz, CDCl<sub>3</sub>)  $\delta$  202.2, 154.8, 144.3, 136.3, 130.8, 129.8, 129.4, 127.4, 127.2, 126.2, 125.6, 122.8, 121.8, 114.1, 77.3, 74.8, 55.2, 21.5; **HRMS** (ESI):  $m/z$   $[M + Na]^+$  calcd for  $[C_{28}H_{26}N_2O_7S]^+$ : 557.1353, found: 557.1351; **HPLC**: Daicel Chiralpak IB, *n*-hexane/*i*-PrOH = 70/30, flow rate = 1 mL/min,  $\lambda = 254$  nm,  $t_{major} = 34.87$  min and  $t_{minor} = 16.90$  min.

***N*-(2-(3-(furan-2-yl)-2-hydroxy-4-nitrobutanoyl)-4-methoxyphenyl)-4-methylbenzenesulfonamide (3cx):**

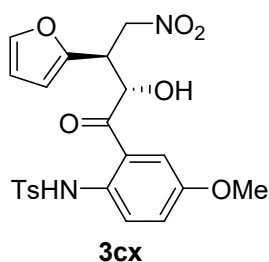

Obtained after purification by column chromatography (DCM/acetone = 50/1) as a yellow solid (79 mg, 83% yield, 2:1 dr);  $[\alpha]_D^{20} = 22.3$  ( $c = 1.0$ , DCM, 92% ee); **m.p.** = 86.9–87.5 °C; **<sup>1</sup>H NMR** (400 MHz, CDCl<sub>3</sub>)  $\delta$  10.22 (s, 1H), 7.76–7.68 (m, 3H), 7.26–7.17 (m, 3H), 7.09–7.05 (m, 1H), 6.95 (d,  $J = 2.9$  Hz, 1H), 6.10 (d,  $J = 3.2$  Hz, 1H), 5.85 (d,  $J = 3.3$  Hz, 1H), 5.28 (s, 1H), 4.70 (dd,  $J = 13.8, 8.8$  Hz, 1H), 4.58 (dd,  $J = 13.8, 5.5$  Hz, 1H), 3.83–3.77 (m, 1H), 3.75 (s, 3H), 2.35 (s, 3H); **<sup>13</sup>C NMR** (101 MHz, CDCl<sub>3</sub>)  $\delta$  202.2, 155.1, 148.7, 144.4, 142.7, 136.4, 133.3, 129.8, 127.3, 122.3, 122.3, 121.0, 114.7, 110.7, 108.6, 73.6, 72.5, 55.6, 42.7, 21.5; **HRMS** (ESI):  $m/z$   $[M + Na]^+$  calcd for  $[C_{22}H_{22}N_2O_8S]^+$ : 497.0989, found: 495.0987; **HPLC**: Daicel Chiralpak IE, *n*-hexane/*i*-PrOH = 70/30, flow rate = 1 mL/min,  $\lambda = 254$  nm,  $t_{major} = 35.56$  min and  $t_{minor} = 26.75$  min.

***N*-(2-(2-hydroxy-4-nitro-3-(thiophen-2-yl)butanoyl)-4-methoxyphenyl)-4-methylbenzenesulfonamide (3cy):**

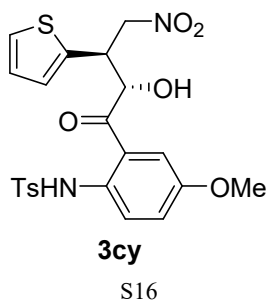



Obtained after purification by column chromatography (DCM/acetone = 50/1) as a yellow solid (78 mg, 80% yield, 6:1 dr);  $[\alpha]_D^{20} = 15.9$  ( $c = 1.0$ , DCM, 93% ee); **m.p.** = 92.9–93.7 °C; **<sup>1</sup>H NMR** (400 MHz, CDCl<sub>3</sub>)  $\delta$  10.23 (s, 1H), 7.77 (d,  $J = 9.2$  Hz, 1H), 7.69 (d,  $J = 8.4$  Hz, 2H), 7.23–7.17 (m, 3H), 7.16–7.10 (m, 1H), 6.98 (d,  $J = 2.9$  Hz, 1H), 6.89–6.82 (m, 2H), 5.23 (s, 1H), 4.56 (dd,  $J = 13.8, 8.7$  Hz, 1H), 4.35 (dd,  $J = 13.8, 5.7$  Hz, 1H), 4.07 (dd,  $J = 8.1, 4.5$  Hz, 1H), 3.75 (s, 3H), 2.33 (s, 3H); **<sup>13</sup>C NMR** (101 MHz, CDCl<sub>3</sub>)  $\delta$  201.7, 155.2, 144.5, 138.5, 136.3, 133.7, 129.8, 127.3, 126.7, 125.9, 122.7, 120.6, 114.4, 75.5, 75.0, 55.7, 43.5, 21.5; **HRMS** (ESI):  $m/z$   $[M + Na]^+$  calcd for  $[C_{22}H_{22}N_2O_7S_2]^+$ : 513.0760, found: 513.0757; **HPLC**: Daicel Chiralpak IE, *n*-hexane/*i*-PrOH = 70/30, flow rate = 1 mL/min,  $\lambda = 254$  nm,  $t_{major} = 42.390$  min and  $t_{minor} = 32.131$  min.

***N*-(2-(3-cyclohexyl-2-hydroxy-4-nitrobutanoyl)-4-methoxyphenyl)-4-methylbenzenesulfonamide (3cz):**

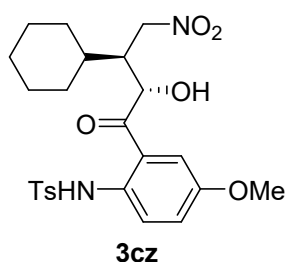

Obtained after purification by column chromatography (DCM/acetone = 50/1) as a yellow solid (68 mg, 70% yield, 5:1 dr);  $[\alpha]_D^{20} = 18.9$  ( $c = 1.0$ , DCM, 94% ee); **m.p.** = 81.5–82.7 °C; **<sup>1</sup>H NMR** (400 MHz, CDCl<sub>3</sub>)  $\delta$  10.30 (s, 1H), 7.78 (d,  $J = 9.1$  Hz, 1H), 7.69 (d,  $J = 8.3$  Hz, 2H), 7.19 (d,  $J = 8.1$  Hz, 2H), 7.16–7.11 (m, 1H), 7.09 (d,  $J = 2.8$  Hz, 1H), 5.22 (s, 1H), 4.24 (dd,  $J = 14.3, 6.5$  Hz, 1H), 4.01 (dd,  $J = 14.3, 5.5$  Hz, 1H), 3.80 (s, 3H), 3.63 (d,  $J = 5.0$  Hz, 1H), 2.52 (d,  $J = 5.9$  Hz, 1H), 2.34 (s, 3H), 1.93 (d,  $J = 9.5$  Hz, 1H), 1.80 (d,  $J = 9.4$  Hz, 3H), 1.71 (d,  $J = 11.6$  Hz, 1H), 1.28–1.13 (m, 5H); **<sup>13</sup>C NMR** (101 MHz, CDCl<sub>3</sub>)  $\delta$  203.6, 154.8, 144.3, 136.2, 134.1, 129.7, 127.3, 122.1, 119.7, 114.7, 72.7, 72.0, 55.7, 46.6, 40.2, 30.9, 30.1, 26.4, 26.1, 21.5; **HRMS** (ESI):  $m/z$   $[M + Na]^+$  calcd for  $[C_{24}H_{30}N_2O_7S]^+$ : 513.1666, found: 513.1670; **HPLC**: Daicel Chiralpak IE, *n*-hexane/*i*-PrOH = 70/30, flow rate = 1 mL/min,  $\lambda = 254$  nm,  $t_{major} = 35.34$  min and  $t_{minor} = 33.23$  min.

***N*-(2-(3-cyclopropyl-2-hydroxy-4-nitrobutanoyl)-4-methoxyphenyl)-4-methylbenzenesulfonamide (3cza):**

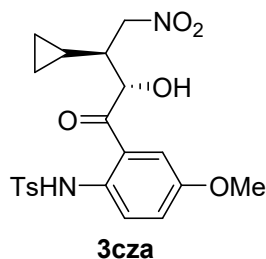

Obtained after purification by column chromatography (DCM/acetone = 50/1) as a yellow solid (65 mg, 73% yield, 6:1 dr);  $[\alpha]_D^{20} = 8.2$  ( $c = 1.0$ , DCM, 98% ee); **m.p.** = 76.4–77.9 °C; **<sup>1</sup>H NMR** (400 MHz, CDCl<sub>3</sub>)  $\delta$  10.32 (s, 1H), 7.81 (d,  $J = 9.1$  Hz, 1H), 7.69 (d,  $J = 8.3$  Hz, 2H), 7.20 (d,  $J = 8.1$  Hz, 2H), 7.17–7.10 (m, 2H), 5.26 (s, 1H), 4.37 (dd,  $J = 12.9, 7.3$  Hz, 1H), 3.98 (dd,  $J = 12.9, 5.5$  Hz, 1H), 3.80 (s, 3H), 3.53 (d,  $J = 6.2$  Hz, 1H), 2.33 (s, 3H), 1.06–0.97 (m, 1H), 0.64–0.55 (m, 1H), 0.50–0.41 (m, 1H), 0.19

(dd,  $J = 9.7, 4.8$  Hz, 1H), 0.15–0.08 (m, 1H);  $^{13}\text{C}$  NMR (101 MHz,  $\text{CDCl}_3$ )  $\delta$  203.0, 155.0, 144.4, 136.4, 133.8, 129.7, 127.2, 122.3, 122.0, 120.6, 114.9, 74.9, 74.0, 55.7, 48.2, 21.5, 12.6, 5.0, 4.1; **HRMS** (ESI):  $m/z$   $[\text{M} + \text{Na}]^+$  calcd for  $[\text{C}_{21}\text{H}_{24}\text{N}_2\text{O}_7\text{S}]^+$ : 471.1196, found: 471.1198; **HPLC**: Daicel Chiralpak IE, *n*-hexane/*i*-PrOH = 70/30, flow rate = 1 mL/min,  $\lambda = 254$  nm,  $t_{\text{major}} = 49.943$  min and  $t_{\text{minor}} = 37.109$  min.

***N*-(2-((2*S*,3*S*)-2-hydroxy-4-nitro-3-phenylpentanoyl)-4-methoxyphenyl)-4-methylbenzenesulfonamide (3czb):**

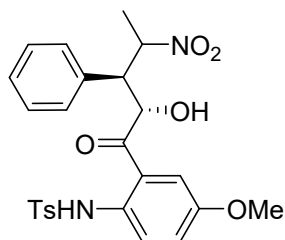

**3czb**

Obtained after purification by column chromatography (DCM/acetone = 60/1) as a yellow solid (87 mg, 88% yield, 6:1 dr);  $[\alpha]_{\text{D}}^{20} = 6.2$  ( $c = 1.0$ , DCM, 52% ee); **m.p.** = 96.3–97.9 °C;  $^1\text{H}$  NMR (400 MHz,  $\text{CDCl}_3$ )  $\delta$  10.19 (s, 1H), 7.80 (d,  $J = 8.3$  Hz, 2H), 7.73 (d,  $J = 9.2$  Hz, 1H), 7.34 (d,  $J = 7.4$  Hz, 3H), 7.26–7.20 (m, 4H), 7.08–7.04 (m, 1H), 6.76 (d,  $J = 2.9$  Hz, 1H), 5.16 (dd,  $J = 5.7, 3.3$  Hz, 1H), 5.08 (dd,  $J = 10.0, 6.9$  Hz, 1H), 3.91 (d,  $J = 5.7$  Hz, 1H), 3.62 (s, 3H), 3.55 (dd,  $J = 10.0, 3.2$  Hz, 1H), 2.35 (s, 3H), 1.19 (d,  $J = 6.9$  Hz, 3H);  $^{13}\text{C}$  NMR (101 MHz,  $\text{CDCl}_3$ )  $\delta$  201.7, 154.5, 144.0, 138.1, 136.3, 134.0, 129.7, 129.5, 128.5, 128.4, 127.7, 122.1, 121.2, 119.7, 114.5, 82.2, 76.1, 55.5, 52.9, 21.6, 19.4; **HRMS** (ESI):  $m/z$   $[\text{M} + \text{Na}]^+$  calcd for  $[\text{C}_{25}\text{H}_{26}\text{N}_2\text{O}_7\text{S}]^+$ : 521.1353, found: 521.1350; **HPLC**: Daicel Chiralpak IA, *n*-hexane/*i*-PrOH = 85/15, flow rate = 1 mL/min,  $\lambda = 254$  nm,  $t_{\text{major}} = 35.064$  min and  $t_{\text{minor}} = 27.734$  min.

## General Procedure for 4

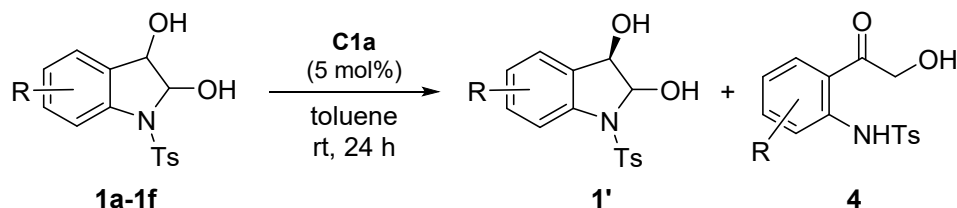

In a flame-dried Schlenk tube, a solution of diethylzinc (40  $\mu$ L, 1.0 mol/L in hexane, 0.04 mmol) was added to a solution of the chiral ligand (*S,S*)-**La** (0.02 mmol 14.1 mg) in dry toluene (2.0 mL) under nitrogen. The mixture was stirred at room temperature for 30 min. Thus, the preparation of **C2a** was finished. Then, **1a** (0.2 mmol, 61.2 mg) were added. The reaction mixture was stirred for 24 h at room temperature. The reaction was quenched with  $\text{NH}_4\text{Cl}$  solution (4 mL), and the aqueous layer was extracted with  $\text{CH}_2\text{Cl}_2$  ( $3 \times 5$  mL). The combined organic layer was washed with brine and dried over  $\text{Na}_2\text{SO}_4$ . The solvent was removed under reduced pressure by using a rotary evaporator. The residue was purified by flash chromatography with petroleum DCM/acetone = 50/1 to afford the desired product **4** and **1'**.

### *N*-(2-(2-hydroxyacetyl)phenyl)-4-methylbenzenesulfonamide (**4a**):

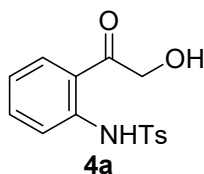

Obtained after purification by column chromatography (DCM/acetone = 50/1) as a white solid (29 mg, 48% yield); **m.p.** = 112.4–113.9  $^\circ\text{C}$ ; **<sup>1</sup>H NMR** (400 MHz,  $\text{CDCl}_3$ )  $\delta$  11.02 (s, 1H), 7.75 (d,  $J$  = 8.2 Hz, 3H), 7.60 (d,  $J$  = 7.9 Hz, 1H), 7.52 (t,  $J$  = 7.5 Hz, 1H), 7.24 (d,  $J$  = 8.1 Hz, 2H), 7.09 (t,  $J$  = 7.5 Hz, 1H), 4.78 (s, 2H), 3.38 (s, 1H), 2.37 (s, 3H); **<sup>13</sup>C NMR** (101 MHz,  $\text{CDCl}_3$ )  $\delta$  201.2, 144.2, 140.3, 136.3, 135.9, 129.8, 129.4, 127.3, 122.9, 119.3, 119.0, 65.4, 21.6; **HRMS** (ESI):  $m/z$  [ $\text{M} - \text{H}$ ] $^-$  calcd for [ $\text{C}_{15}\text{H}_{15}\text{NO}_4\text{S}$ ] $^-$ : 304.0649, found: 304.0647.

### *N*-(2-(2-hydroxyacetyl)-4-methylphenyl)-4-methylbenzenesulfonamide (**4b**):

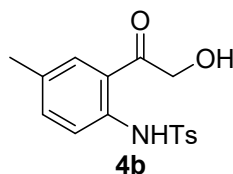

Obtained after purification by column chromatography (DCM/acetone = 50/1) as a white solid (29 mg, 45% yield); **m.p.** = 98.3–99.6  $^\circ\text{C}$ ; **<sup>1</sup>H NMR** (400 MHz,  $\text{CDCl}_3$ )  $\delta$  10.73 (s, 1H), 7.62 (d,  $J$  = 8.2 Hz, 2H), 7.57 (d,  $J$  = 8.5 Hz, 1H), 7.28 (s, 1H), 7.22 (d,  $J$  = 20.3 Hz, 1H), 7.14 (d,  $J$  = 8.1 Hz, 2H), 4.66 (s, 2H), 3.32 (s, 1H), 2.29 (s, 3H), 2.23 (s, 3H); **<sup>13</sup>C NMR** (101 MHz,  $\text{CDCl}_3$ )  $\delta$  201.2, 144.1, 137.7, 136.8, 136.3, 132.9, 130.2, 129.7, 129.5, 127.3, 119.8, 119.3, 65.4, 21.6, 20.7; **HRMS** (ESI):  $m/z$  [ $\text{M} - \text{H}$ ] $^-$  calcd for [ $\text{C}_{16}\text{H}_{17}\text{NO}_4\text{S}$ ] $^-$ : 318.0805, found: 318.0810;

***N*-(2-(2-hydroxyacetyl)-4-methoxyphenyl)-4-methylbenzenesulfonamide (4c):**

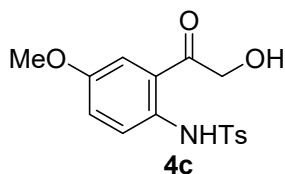

Obtained after purification by column chromatography (DCM/acetone = 50/1) as a white solid (31 mg, 46% yield); **m.p.** = 103.4–105.9 °C; **<sup>1</sup>H NMR** (400 MHz, CDCl<sub>3</sub>) δ 10.20 (s, 1H), 7.66 (d, *J* = 9.1 Hz, 1H), 7.54 (d, *J* = 7.8 Hz, 2H), 7.19 (s, 1H), 7.12 (d, *J* = 7.8 Hz, 2H), 7.04 (d, *J* = 9.1 Hz, 1H), 6.93 (s, 1H), 4.54 (s, 2H), 3.72 (s, 3H), 3.20 (s, 1H), 2.29 (s, 3H); **<sup>13</sup>C NMR** (101 MHz, CDCl<sub>3</sub>) δ 201.0, 155.6, 144.0, 136.0, 132.7, 130.2, 129.6, 127.4, 127.2, 123.2, 121.6, 121.1, 114.0, 65.4, 55.8, 21.6; **HRMS** (ESI): *m/z* [M - H]<sup>-</sup> calcd for [C<sub>16</sub>H<sub>17</sub>NO<sub>5</sub>S]<sup>-</sup>: 334.0754, found: 334.0756;

***N*-(4-fluoro-2-(2-hydroxyacetyl)phenyl)-4-methylbenzenesulfonamide (4d):**

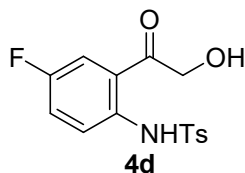

Obtained after purification by column chromatography (DCM/acetone = 50/1) as a white solid (30 mg, 47% yield); **m.p.** = 112.5–113.9 °C; **<sup>1</sup>H NMR** (400 MHz, CDCl<sub>3</sub>) δ 10.62 (s, 1H), 7.81–7.76 (m, 1H), 7.67 (d, *J* = 8.3 Hz, 2H), 7.28 (d, *J* = 4.7 Hz, 1H), 7.23 (d, *J* = 8.2 Hz, 3H), 4.68 (s, 2H), 3.25 (s, 1H), 2.38 (s, 3H); **<sup>13</sup>C NMR** (101 MHz, CDCl<sub>3</sub>) δ 200.5, 157.7 (d, *J* = 245.7 Hz), 144.4, 136.3, 135.9, 129.8, 127.25, 123.4, 123.1, 122.4 (d, *J* = 8.1 Hz), 115.3 (d, *J* = 23.3 Hz), 65.5, 21.6; **<sup>19</sup>F NMR** (376 MHz, CDCl<sub>3</sub>) δ -117.31; **HRMS** (ESI): *m/z* [M - H]<sup>-</sup> calcd for [C<sub>15</sub>H<sub>14</sub>FNO<sub>4</sub>S]<sup>-</sup>: 322.0555, found: 322.0546;

***N*-(4-chloro-2-(2-hydroxyacetyl)phenyl)-4-methylbenzenesulfonamide (4e):**

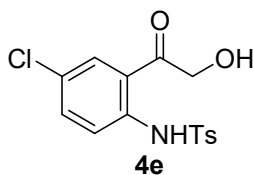

Obtained after purification by column chromatography (DCM/acetone = 50/1) as a yellow solid (33 mg, 48% yield); **m.p.** = 105.4–106.9 °C; **<sup>1</sup>H NMR** (400 MHz, CDCl<sub>3</sub>) δ 10.86 (s, 1H), 7.75–7.70 (m, 3H), 7.53 (d, *J* = 2.3 Hz, 1H), 7.50–7.45 (m, 1H), 7.24 (s, 1H), 4.75 (s, 2H), 3.28 (s, 1H), 2.38 (s, 3H); **<sup>13</sup>C NMR** (101 MHz, CDCl<sub>3</sub>) δ 200.6, 144.5, 138.7, 136.0, 135.8, 129.9, 129.0, 128.4, 127.3, 121.0, 120.1, 65.5, 21.6; **HRMS** (ESI): *m/z* [M - H]<sup>-</sup> calcd for [C<sub>15</sub>H<sub>14</sub>ClNO<sub>4</sub>S]<sup>-</sup>: 338.0259, found: 338.0257;

***N*-(4-bromo-2-(2-hydroxyacetyl)phenyl)-4-methylbenzenesulfonamide (4f):**

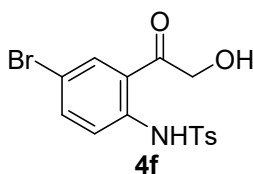

Obtained after purification by column chromatography (DCM/acetone = 50/1) as a yellow solid (33 mg, 43% yield); **m.p.** = 75.4–76.9 °C; **<sup>1</sup>H NMR** (400 MHz, CDCl<sub>3</sub>) δ 10.79 (s, 1H), 7.67–7.63 (m, 3H), 7.46 (d, *J* = 2.4 Hz, 1H), 7.42–7.38 (m, 1H), 7.18 (d, *J* = 8.9 Hz, 2H), 4.67 (s, 2H), 3.24 (s, 1H), 2.31 (s, 3H); **<sup>13</sup>C NMR** (101 MHz, CDCl<sub>3</sub>) δ 200.6, 144.6, 138.7, 135.8, 130.3, 129.9, 129.0, 127.3, 121.0, 120.1, 65.5, 21.6; **HRMS** (ESI): *m/z* [M - H]<sup>-</sup> calcd for [C<sub>15</sub>H<sub>14</sub>BrNO<sub>4</sub>S]<sup>-</sup>: 381.9754, found: 381.9752;

***N*-(2-(2-hydroxyacetyl)-4-methoxyphenyl)-4-methylbenzenesulfonamide (4g):**

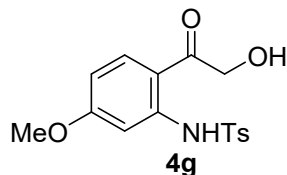

Obtained after purification by column chromatography (DCM/acetone = 50/1) as a white solid (33 mg, 43% yield); **m.p.** = 95.6–96.3 °C; **<sup>1</sup>H NMR** (400 MHz, CDCl<sub>3</sub>) δ 11.41 (s, 1H), 7.77 (d, *J* = 8.3 Hz, 2H), 7.51 (d, *J* = 9.0 Hz, 1H), 7.27 (s, 1H), 7.25 (s, 1H), 7.22 (d, *J* = 2.4 Hz, 1H), 6.58–6.54 (m, 1H), 4.73 (d, *J* = 4.5 Hz, 2H), 3.84 (s, 3H), 3.48 (t, *J* = 4.6 Hz, 1H), 2.38 (s, 3H); **<sup>13</sup>C NMR** (101 MHz, CDCl<sub>3</sub>) δ 199.1, 165.3, 144.3, 143.1, 136.3, 131.5, 129.8, 127.3, 112.1, 109.7, 102.8, 64.8, 55.7, 21.6; **HRMS** (ESI): *m/z* [M - H]<sup>-</sup> calcd for [C<sub>16</sub>H<sub>17</sub>NO<sub>5</sub>S]<sup>-</sup>: 334.0754, found: 334.0753;

## Gram-Scale Reaction

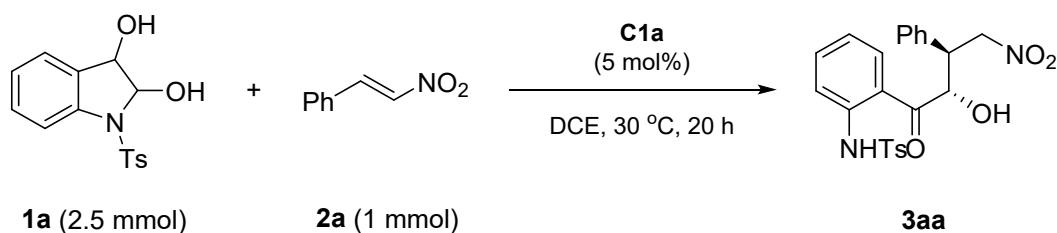

In a flame-dried Schlenk tube, a solution of diethylzinc (0.2 mL, 1.0 mol/L in hexane, 0.2 mmol) was added to a solution of the chiral ligand (*S,S*)-**La** (0.1 mmol 64 mg) in dry DCE (10 mL) under nitrogen. The mixture was stirred at room temperature for 30 min. Thus, the preparation of **C1a** was finished. Then, **1a** (2.5 mmol, 762 mg) and **2a** (1.0 mmol, 149 mg) were added. The reaction mixture was stirred for 20 h at 30 °C. The reaction was quenched with NH<sub>4</sub>Cl solution (4 mL), and the aqueous layer was extracted with CH<sub>2</sub>Cl<sub>2</sub> (3 × 20 mL). The combined organic layer was washed with brine and dried over Na<sub>2</sub>SO<sub>4</sub>. The solvent was removed under reduced pressure by using a rotary evaporator. The residue was purified by flash chromatography with petroleum DCM/acetone = 50/1 to afford the desired product **3** in 75 yield (341mg, 92% ee).

## Derivatization of Product

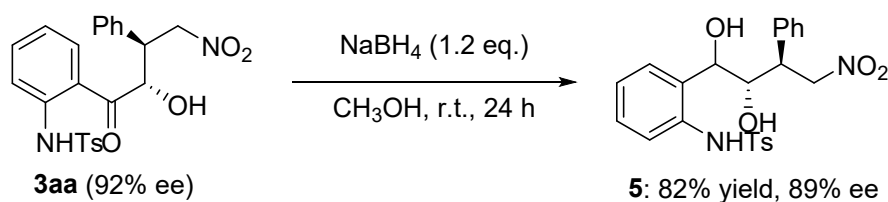

The mixture of **3aa** (45.4 mg, 0.1 mmol, 1.0 eq) and NaBH<sub>4</sub> (4.3 mg, 0.12 mmol, 1.2 eq) were added to the CH<sub>3</sub>OH (3 mL) at 0 °C. Then, the resulting reaction mixture was stirred at room temperature for 24 h. Upon completion as shown by TLC, saturated aqueous NH<sub>4</sub>Cl (3 mL) was then added to quench the reaction. The organic layer was extracted with DCM (3 x 5 mL), then washed with brine, dried over Na<sub>2</sub>SO<sub>4</sub> and concentrated under reduced pressure. The crude reaction mixture was purified via column chromatography (petroleum ether/ethyl acetate = 1/1) on silica gel to afford pure product **5** as a white solid in 82% yield.

***N*-((2*S*,3*S*)-1,2-dihydroxy-4-nitro-3-phenylbutyl)phenyl)-4-methylbenzenesulfonamide (**5**):**

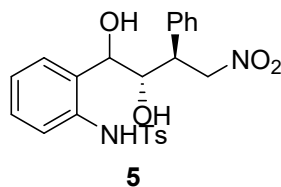

White solid in 82% isolated yield (37.4 mg);  $[\alpha]_{\text{D}}^{20} = -21.3$  (c = 1.0, DCM, 89% ee); **m.p.** = 50.2–51.4 °C; **<sup>1</sup>H NMR** (400 MHz, DMSO)  $\delta$  9.48 (s, 1H), 7.65 (d, *J* = 8.3 Hz, 2H), 7.35–7.29 (m, 4H), 7.27 (d, *J* = 7.0 Hz, 1H), 7.24–7.20 (m, 2H), 7.17 (d, *J* = 7.6 Hz, 1H), 7.15–7.08 (m, 2H), 7.04 (t, *J* = 7.2 Hz, 1H), 6.03 (s, 1H), 5.93 (s, 1H), 5.06 (dd, *J* = 13.3, 4.5 Hz, 1H), 4.88 (dd, *J* = 13.3, 10.9 Hz, 1H), 4.55 (d, *J* = 6.3 Hz, 1H), 3.90–3.82 (m, 1H), 3.60 (dd, *J* = 10.6, 4.7 Hz, 1H), 2.35 (s, 3H); **<sup>13</sup>C NMR** (101 MHz, DMSO)  $\delta$  143.8, 139.4, 137.5, 135.9, 134.4, 130.2, 129.3, 128.9, 128.8, 128.2, 127.6, 127.4, 124.6, 121.4,

77.6, 76.8, 72.2, 46.3, 21.5; **HRMS** (ESI):  $m/z$   $[M - H]^-$  calcd for  $[C_{23}H_{24}N_2O_6S]^+$ : 455.1282 found: 455.1283; **HPLC**: Daicel Chiralpak IF, *n*-hexane/*i*-PrOH = 80/20, flow rate = 1 mL/min,  $\lambda$  = 254 nm,  $t_{major}$  = 14.93 min and  $t_{minor}$  = 12.03 min.

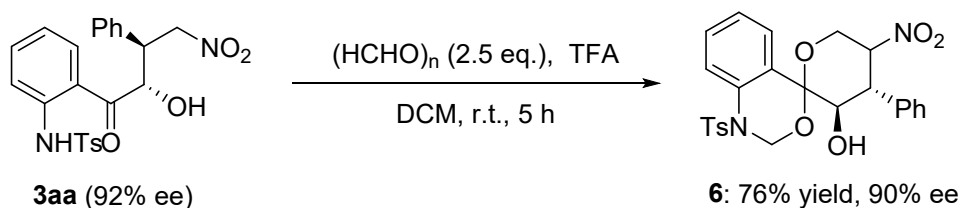

The mixture of **3aa** (45.4 mg, 0.1 mmol, 1.0 eq), (HCHO)*n* (25.2 mg, 0.25 mmol, 2.5 eq) and TFA (25.5 mg, 0.25 mmol, 2.5 eq) were added to the DCM (2 mL). Then, the resulting reaction mixture was stirred at room temperature for 24 h. Upon completion as shown by TLC, the solvent was evaporated and the mixture was directly purified by column chromatography on silica gel eluting with petroleum PE/EA = 4/1 to afford product **6** as a white solid in 76% yield.

**(3'R,4'S)-5'-nitro-4'-phenyl-1-tosyl-1,2,3',4',5',6'-hexahydrospiro[benzo[d][1,3]oxazine-4,2'-pyran]-3'-ol (**6**):**

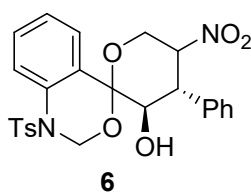

yellow solid in 76% isolated yield (36.5 mg);  $[\alpha]_D^{20} = -42.7$  ( $c = 1.0$ , DCM, 90% ee); **m.p.** = 45.2–46.4 °C; **<sup>1</sup>H NMR** (400 MHz, DMSO)  $\delta$  7.79 (d,  $J = 8.3$  Hz, 2H), 7.43 (d,  $J = 8.5$  Hz, 3H), 7.24 – 7.17 (m, 2H), 7.06 – 7.01 (m, 3H), 6.99 (t,  $J = 7.6$  Hz, 1H), 6.90 – 6.85 (m, 2H), 5.81 (d,  $J = 10.8$  Hz, 1H), 5.22 (d,  $J = 14.3$  Hz, 2H), 5.11 (dd,  $J = 13.4, 5.2$  Hz, 1H), 4.99 – 4.88 (m, 2H), 4.44 (d,  $J = 6.3$  Hz, 1H), 2.36 (s, 3H); **<sup>13</sup>C NMR** (101 MHz, DMSO)  $\delta$  145.0, 137.2, 136.9, 135.8, 130.7, 129.9, 128.8, 128.1, 128.0, 127.8, 127.6, 125.1, 123.7, 121.0, 101.7, 95.1, 85.5, 77.6, 72.3, 42.7, 21.5; **HRMS** (ESI):  $m/z$   $[M + H]^+$  calcd for  $[C_{25}H_{24}N_2O_7S]^+$ : 497.1382, found: 497.1390; **HPLC**: Daicel Chiralpak IB, *n*-hexane/*i*-PrOH = 90/10, flow rate = 1 mL/min,  $\lambda$  = 254 nm,  $t_{major}$  = 12.13 min and  $t_{minor}$  = 13.90 min.

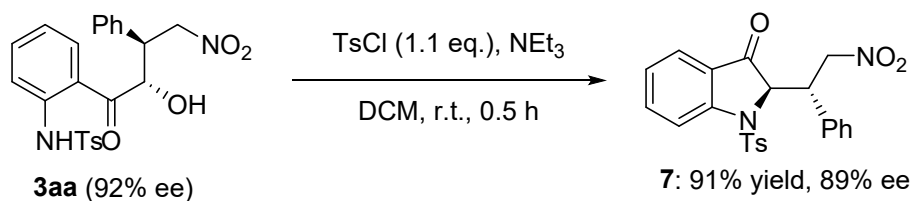

The mixture of **3aa** (45.4 mg, 0.1 mmol, 1.0 eq) and NEt<sub>3</sub> (0.5 mL) were added to the DCM (2 mL) under nitrogen. The mixture was stirred at room temperature for 30 min. Then, TsCl (42 mg, 0.11 mmol, 1.1 eq) were added. The reaction mixture was stirred for 0.5 h at room temperature. Upon completion as shown by TLC, saturated aqueous NH<sub>4</sub>Cl (3 mL) was then added to quench the reaction. The organic layer was extracted with DCM (3 x 5 mL), then washed with brine, dried over Na<sub>2</sub>SO<sub>4</sub> and concentrated

under reduced pressure. The crude reaction mixture was purified via column chromatography (petroleum ether/ethyl acetate = 1/1) on silica gel to afford pure product **7** as a yellow solid in 89% yield.

**(R)-2-((S)-2-nitro-1-phenylethyl)-1-tosylindolin-3-one (7):**

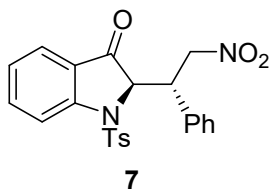

yellow solid in 91% isolated yield (39.7mg);  $[\alpha]_D^{20} = -38.9$  (c = 1.0, DCM, 89% ee); **m.p.** = 67.9–69.3°C; **<sup>1</sup>H NMR** (400 MHz, CDCl<sub>3</sub>) δ 8.11 (d, *J* = 6.5 Hz, 1H), 7.80 (d, *J* = 8.3 Hz, 2H), 7.55 (t, *J* = 6.8 Hz, 1H), 7.47 (d, *J* = 7.2 Hz, 1H), 7.39 (t, *J* = 7.6 Hz, 1H), 7.25 (d, *J* = 8.1 Hz, 2H), 7.19 (s, 1H), 7.16–7.09 (m, 3H), 6.85–6.78 (m, 2H), 5.40–5.33 (m, 1H), 4.92 (d, *J* = 7.3 Hz, 1H), 3.48 (d, *J* = 6.0 Hz, 1H), 2.38 (s, 3H); **<sup>13</sup>C NMR** (101 MHz, CDCl<sub>3</sub>) δ 196.7, 147.3, 145.0, 139.3, 136.8, 135.3, 135.2, 131.0, 130.1, 129.8, 129.6, 128.4, 128.3, 128.6, 127.8, 127.6, 76.6, 53.7, 29.7, 21.7; **HRMS** (ESI): *m/z* [M + H]<sup>+</sup> calcd for [C<sub>23</sub>H<sub>20</sub>N<sub>2</sub>O<sub>5</sub>S]<sup>+</sup>: 437.1166, found: 437.1170; **HPLC**: Daicel Chiralpak IE, *n*-hexane/*i*-PrOH = 70/30, flow rate = 1 mL/min, λ = 254 nm, *t*<sub>major</sub> = 26.49 min and *t*<sub>minor</sub> = 34.79 min.

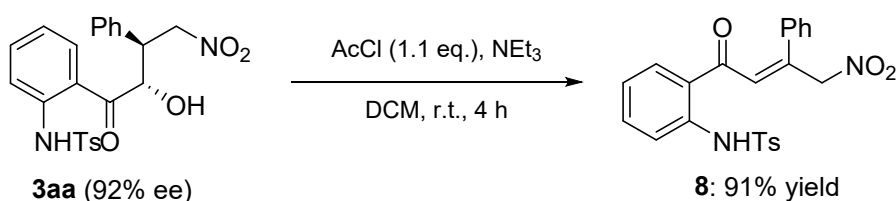

The mixture of **3aa** (45.4 mg, 0.1 mmol, 1.0 eq) and NEt<sub>3</sub> (0.5 mL) were added to the DCM (2 mL) under nitrogen. The mixture was stirred at room temperature for 30 min. Then, AcCl (9 mg, 0.11 mmol, 1.1eq) were added. The reaction mixture was stirred for 4 h at room temperature. Upon completion as shown by TLC, saturated aqueous NH<sub>4</sub>Cl (3 mL) was then added to quench the reaction. The organic layer was extracted with DCM (3 x 5 mL), then washed with brine, dried over Na<sub>2</sub>SO<sub>4</sub> and concentrated under reduced pressure. The crude reaction mixture was purified via column chromatography (petroleum ether/ethyl acetate = 1/1) on silica gel to afford pure product **7** as a white solid in 91% yield.

**(E)-4-methyl-N-(2-(4-nitro-3-phenylbut-2-enyl)phenyl)benzenesulfonamide (8):**

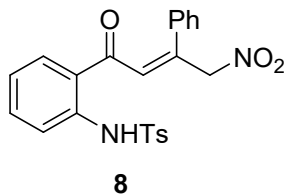

White solid in 91% isolated yield (39.7 mg); **m.p.** = 32.2–33.4 °C; **<sup>1</sup>H NMR** (400 MHz, CDCl<sub>3</sub>) δ 7.97 (d, *J* = 7.9 Hz, 1H), 7.79–7.74 (m, 1H), 7.70 (d, *J* = 7.2 Hz, 3H), 7.54–7.48 (m, 2H), 7.46 (d, *J* = 7.8 Hz, 2H), 7.38 (t, *J* = 7.4 Hz, 1H), 7.24 (d, *J* = 8.3 Hz, 2H), 7.05 (d, *J* = 8.1 Hz, 2H), 6.90 (s, 1H), 2.32 (s, 3H); **<sup>13</sup>C NMR** (101 MHz, CDCl<sub>3</sub>) δ 184.6, 145.5, 144.0, 139.1, 136.3, 135.6, 134.5, 134.3, 131.7, 130.3, 129.5, 129.2, 128.8, 128.7, 128.6, 127.3, 125.4, 53.0, 21.5; **HRMS** (ESI): *m/z* [M + H]<sup>+</sup> calcd for [C<sub>23</sub>H<sub>20</sub>N<sub>2</sub>O<sub>5</sub>S]<sup>+</sup>: 437.1166, found: 437.1168.



## Control Experiment

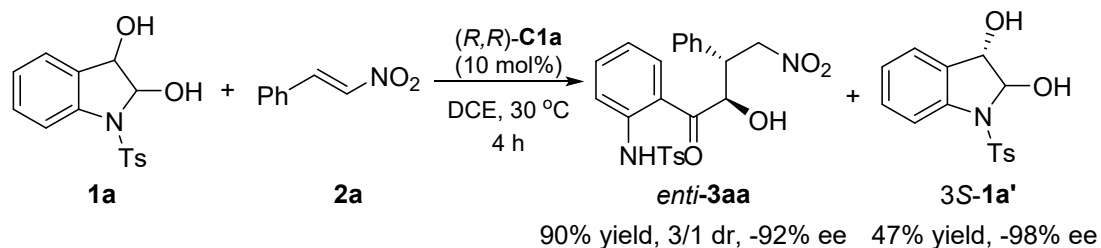

In a flame-dried Schlenk tube, a solution of diethylzinc (40  $\mu$ L, 1.0 mol/L in hexane, 0.04 mmol) was added to a solution of the chiral ligand *(R,R)*-**La** (0.02 mmol 14.1 mg) in dry DCE (2.0 mL) under nitrogen. The mixture was stirred at room temperature for 30 min. Thus, the preparation of **C1a** was finished. Then, **1a** (0.5 mmol, 152.6 mg) and **2a** (0.2 mmol, 29.83 mg) were added. The reaction mixture was stirred for 4 h at 30 °C. The reaction was quenched with  $\text{NH}_4\text{Cl}$  solution (4 mL), and the aqueous layer was extracted with  $\text{CH}_2\text{Cl}_2$  ( $3 \times 5$  mL). The combined organic layer was washed with brine and dried over  $\text{Na}_2\text{SO}_4$ . The solvent was removed under reduced pressure by using a rotary evaporator. The residue was purified by flash chromatography with petroleum DCM/acetone = 50/1 to afford the desired product *anti*-**3aa** and **3S-1a'**.

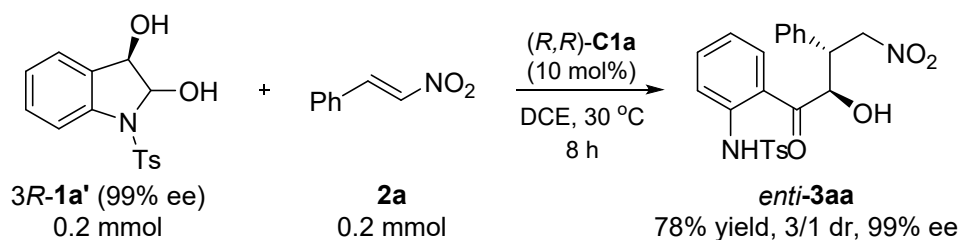

In a flame-dried Schlenk tube, a solution of diethylzinc (40  $\mu$ L, 1.0 mol/L in hexane, 0.04 mmol) was added to a solution of the chiral ligand *(R,R)*-**La** (0.02 mmol 14.1 mg) in dry DCE (2.0 mL) under nitrogen. The mixture was stirred at room temperature for 30 min. Thus, the preparation of **C1a** was finished. Then, **3R-1a'** (0.2 mmol, 61.5 mg) and **2a** (0.2 mmol, 29.83 mg) were added. The reaction mixture was stirred for 8 h at 30 °C. The reaction was quenched with  $\text{NH}_4\text{Cl}$  solution (4 mL), and the aqueous layer was extracted with  $\text{CH}_2\text{Cl}_2$  ( $3 \times 5$  mL). The combined organic layer was washed with brine and dried over  $\text{Na}_2\text{SO}_4$ . The solvent was removed under reduced pressure by using a rotary evaporator. The residue was purified by flash chromatography with petroleum DCM/acetone = 50/1 to afford the desired product *anti*-**3aa**.

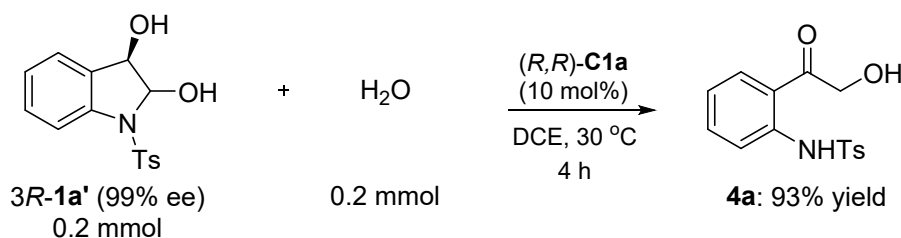

In a flame-dried Schlenk tube, a solution of diethylzinc (40  $\mu$ L, 1.0 mol/L in hexane, 0.04 mmol) was added to a solution of the chiral ligand *(R,R)*-**La** (0.02 mmol 14.1 mg) in dry DCE (2.0 mL) under nitrogen. The mixture was stirred at room temperature for 30 min. Thus, the preparation of

**C1a** was finished. Then, **3R-1a'** (0.2 mmol, 61.5 mg) and **H<sub>2</sub>O** (0.2 mmol, 3.6 mg) were added. The reaction mixture was stirred for 4 h at 30 °C. The reaction was quenched with NH<sub>4</sub>Cl solution (4 mL), and the aqueous layer was extracted with CH<sub>2</sub>Cl<sub>2</sub> (3 × 5 mL). The combined organic layer was washed with brine and dried over Na<sub>2</sub>SO<sub>4</sub>. The solvent was removed under reduced pressure by using a rotary evaporator. The residue was purified by flash chromatography with petroleum DCM/acetone = 50/1 to afford the desired product **4a**.

## NMR Spectra of compounds 3, 4, 5, 6, 7 and 8

$^1\text{H}$  NMR spectrum of compound **3aa** ( $\text{CDCl}_3$ , 400 MHz)

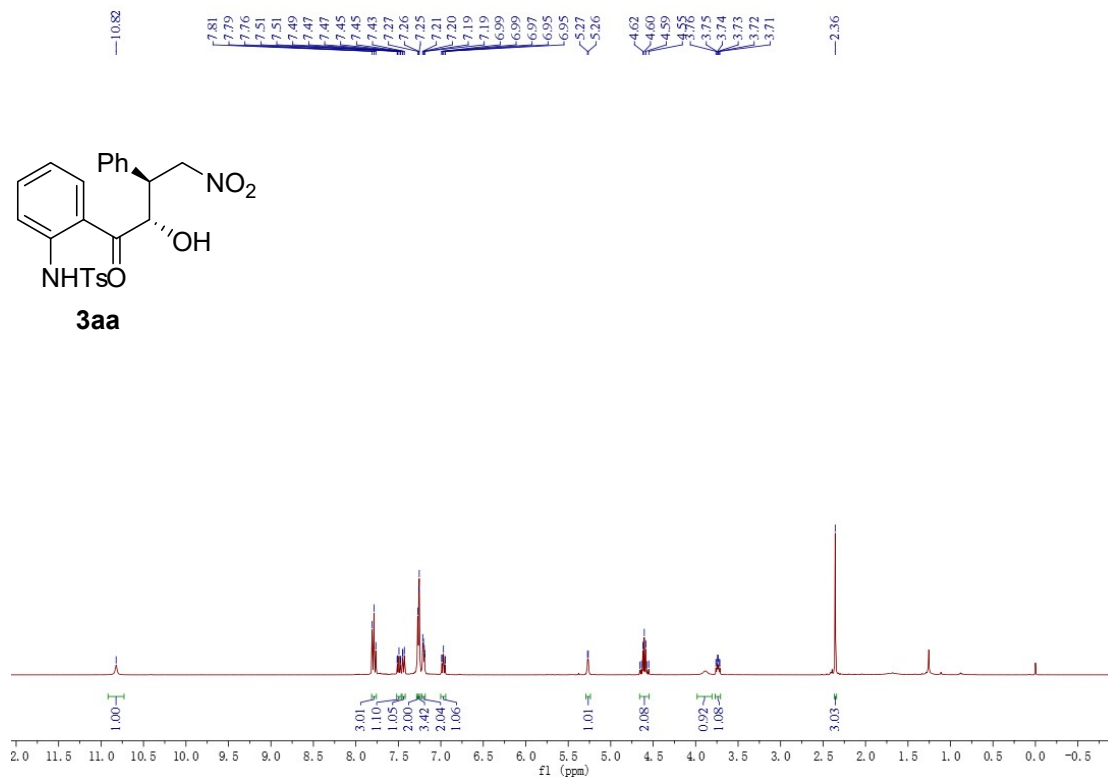

$^{13}\text{C}$  NMR spectrum of compound **3aa** ( $\text{CDCl}_3$ , 400 MHz)

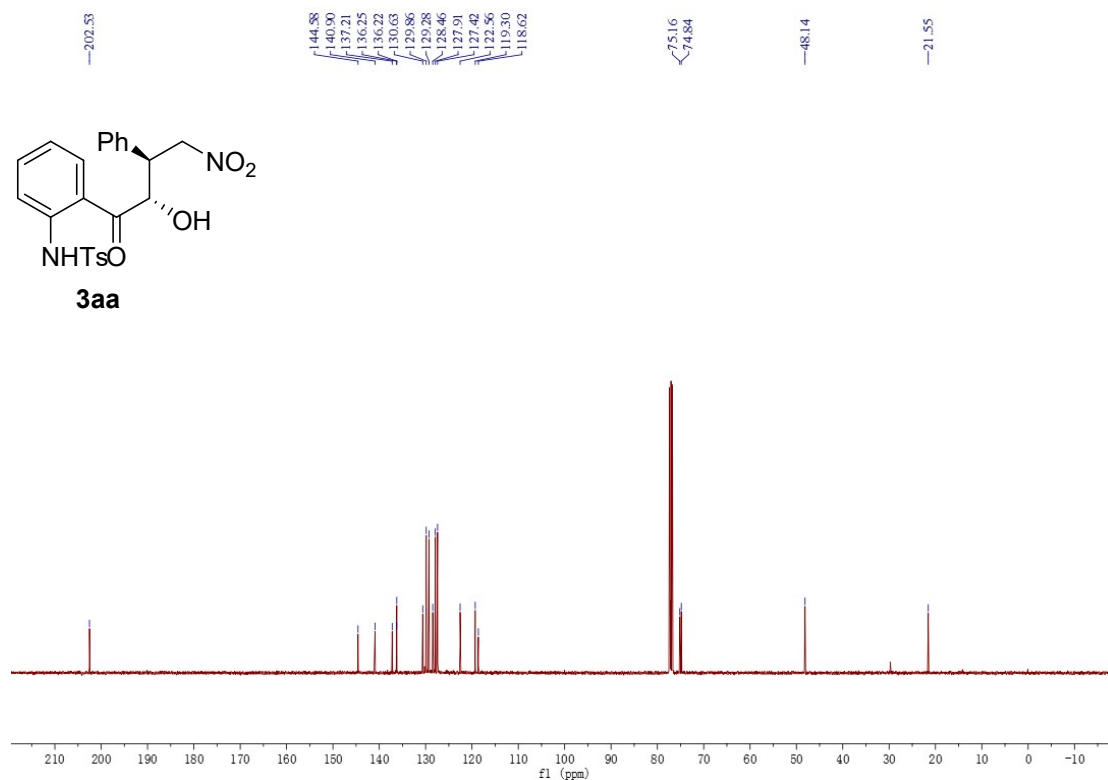

<sup>1</sup>H NMR spectrum of compound **3ba** (CDCl<sub>3</sub>, 400 MHz)

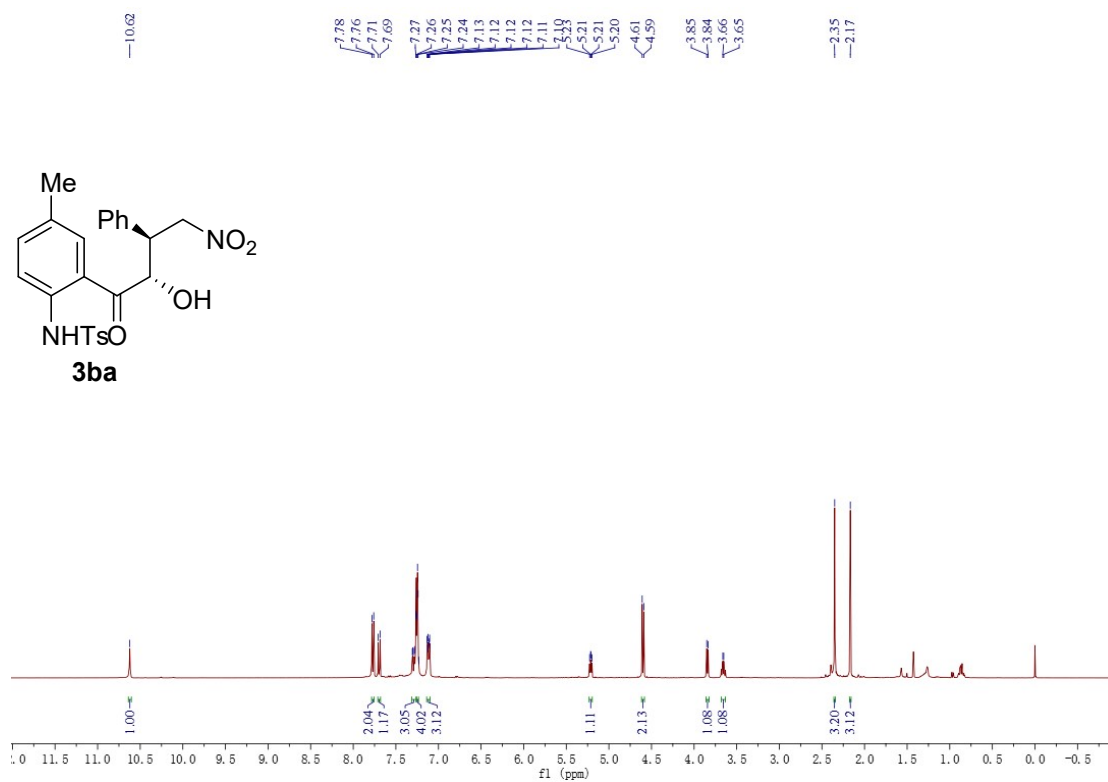

<sup>13</sup>C NMR spectrum of compound **3ba** (CDCl<sub>3</sub>, 400 MHz)

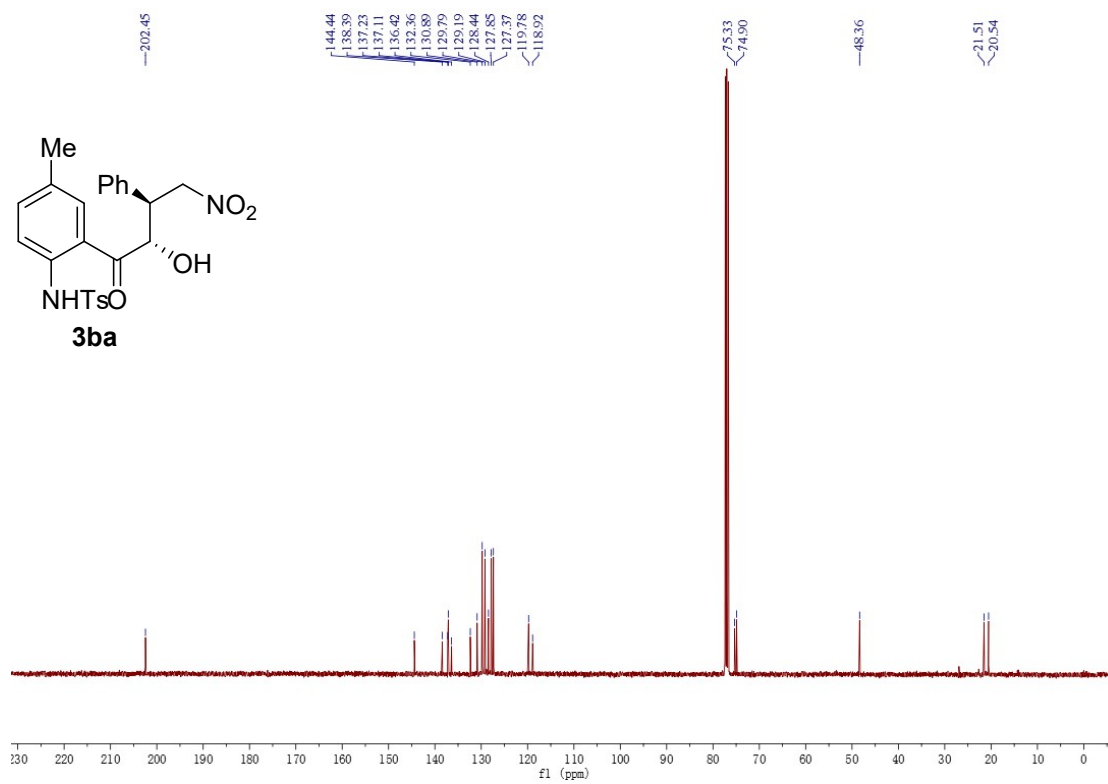

<sup>1</sup>H NMR spectrum of compound **3ca** (CDCl<sub>3</sub>, 400 MHz)

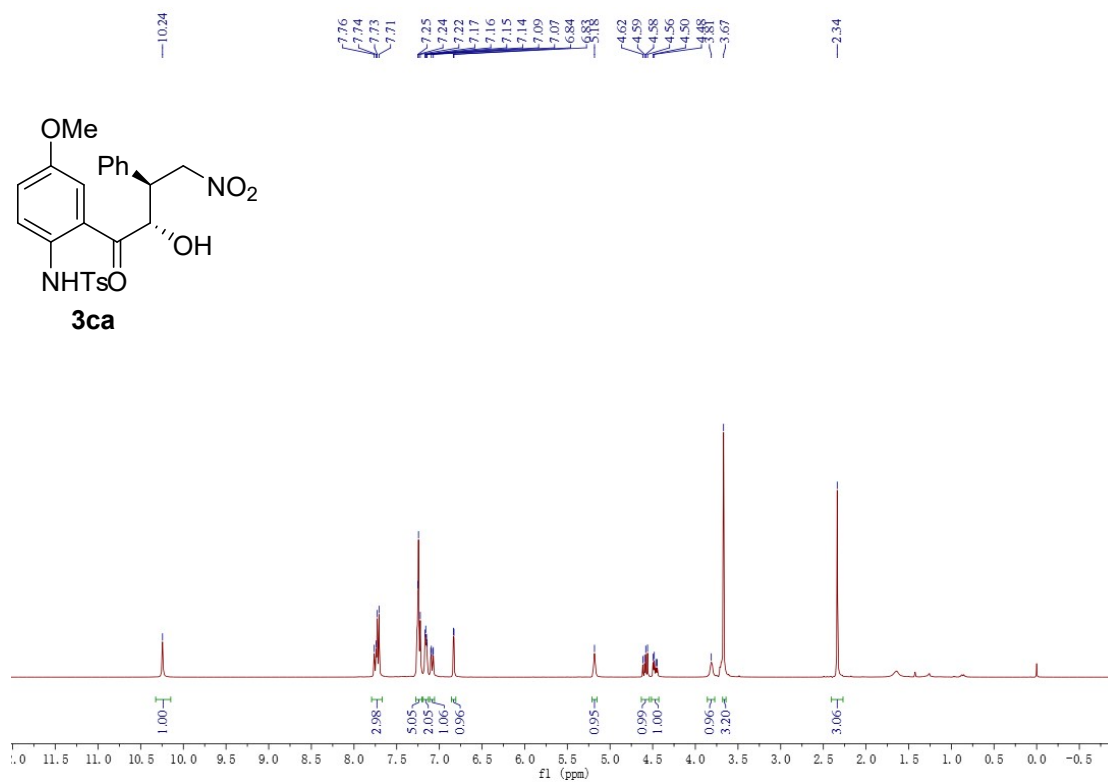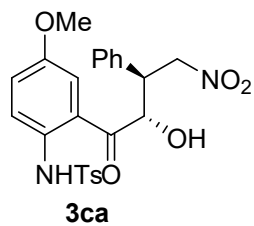

<sup>13</sup>C NMR spectrum of compound **3ca** (CDCl<sub>3</sub>, 400 MHz)

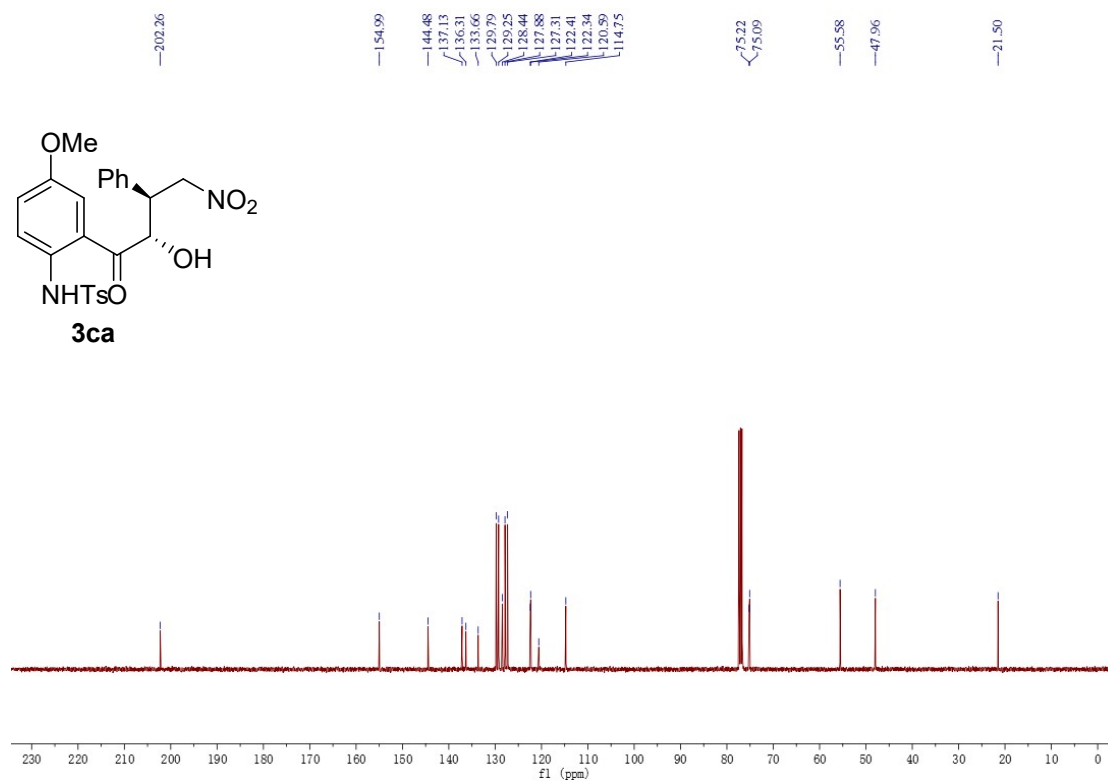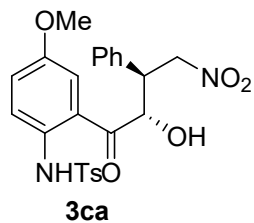

<sup>1</sup>H NMR spectrum of compound **3da** (CDCl<sub>3</sub>, 400 MHz)

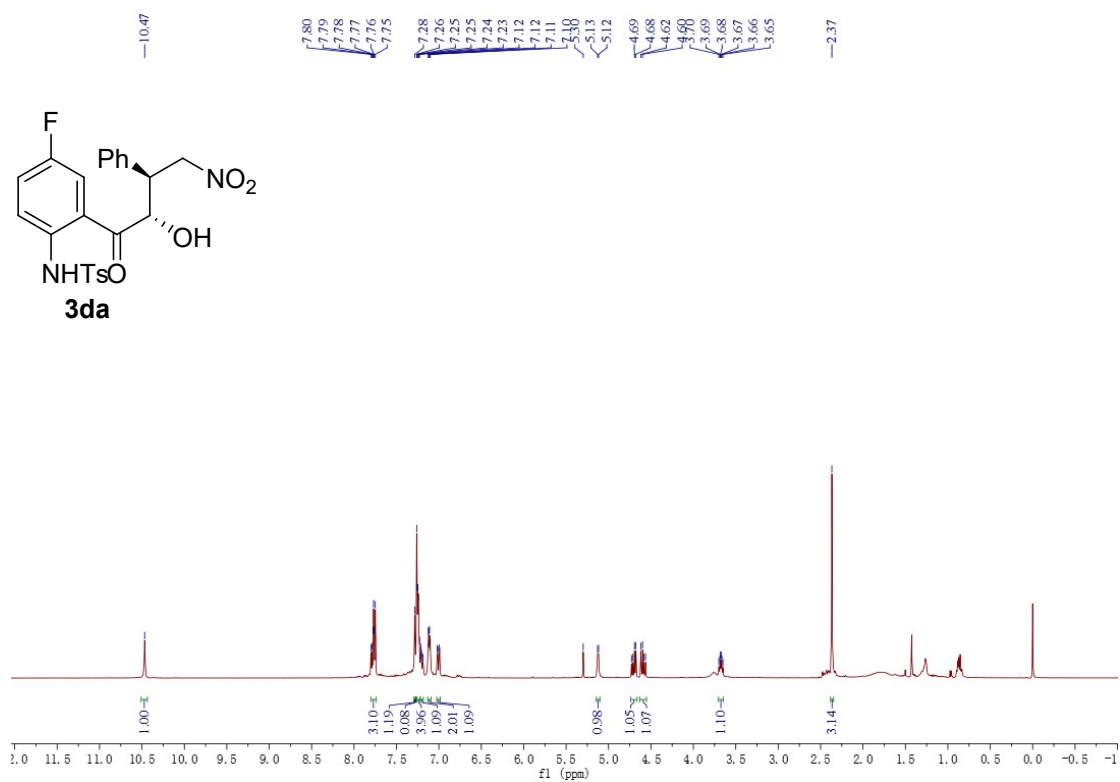

<sup>13</sup>C NMR spectrum of compound **3da** (CDCl<sub>3</sub>, 400 MHz)

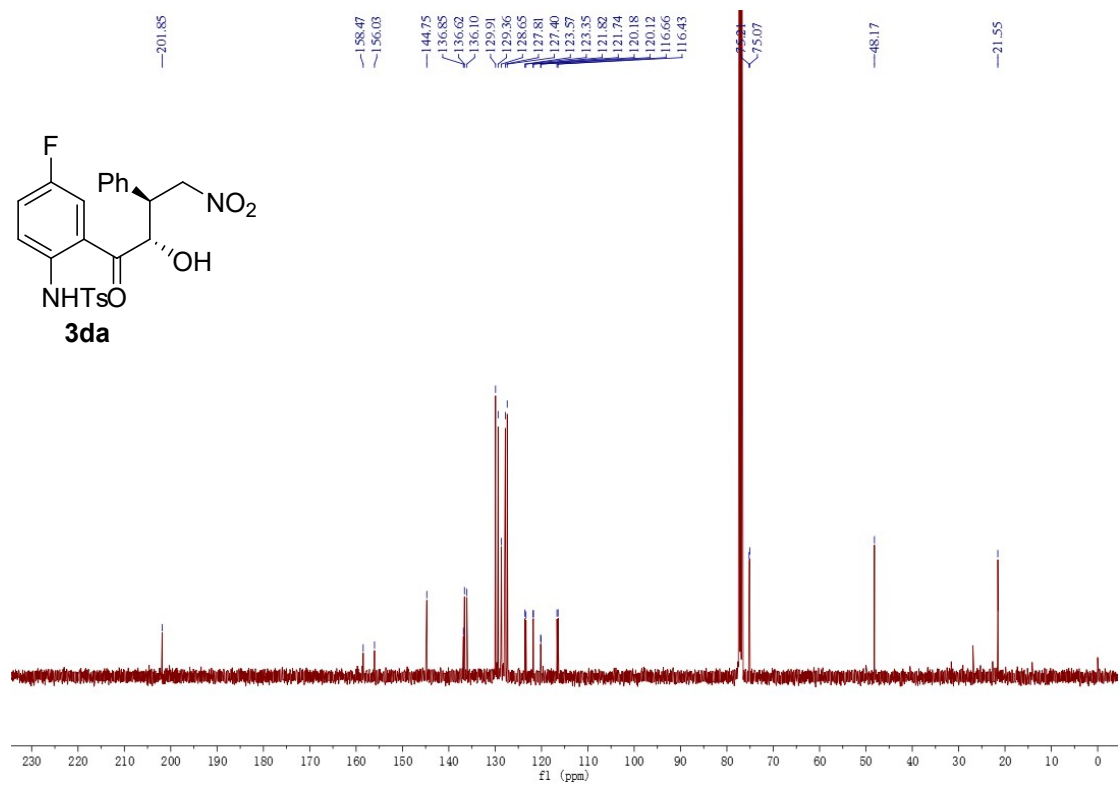

$^{19}\text{F}$  NMR spectrum of compound **3da** ( $\text{CDCl}_3$ , 400 MHz)

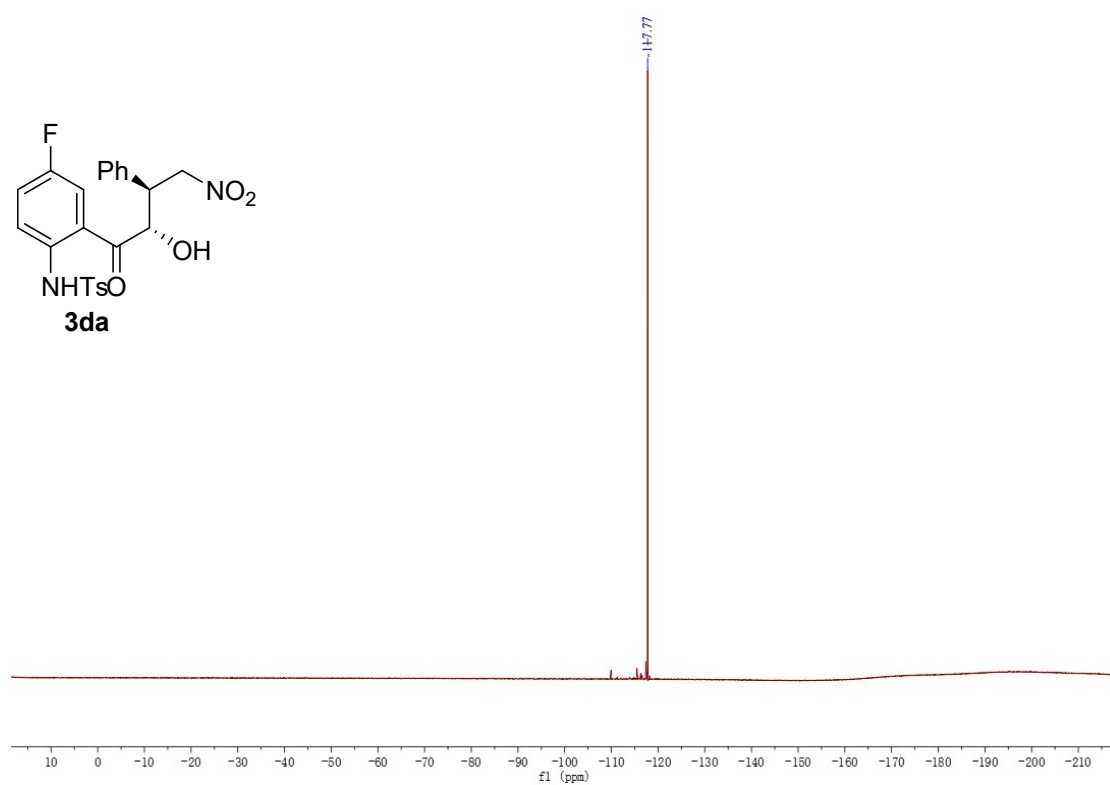

<sup>1</sup>H NMR spectrum of compound **3ea** (CDCl<sub>3</sub>, 400 MHz)

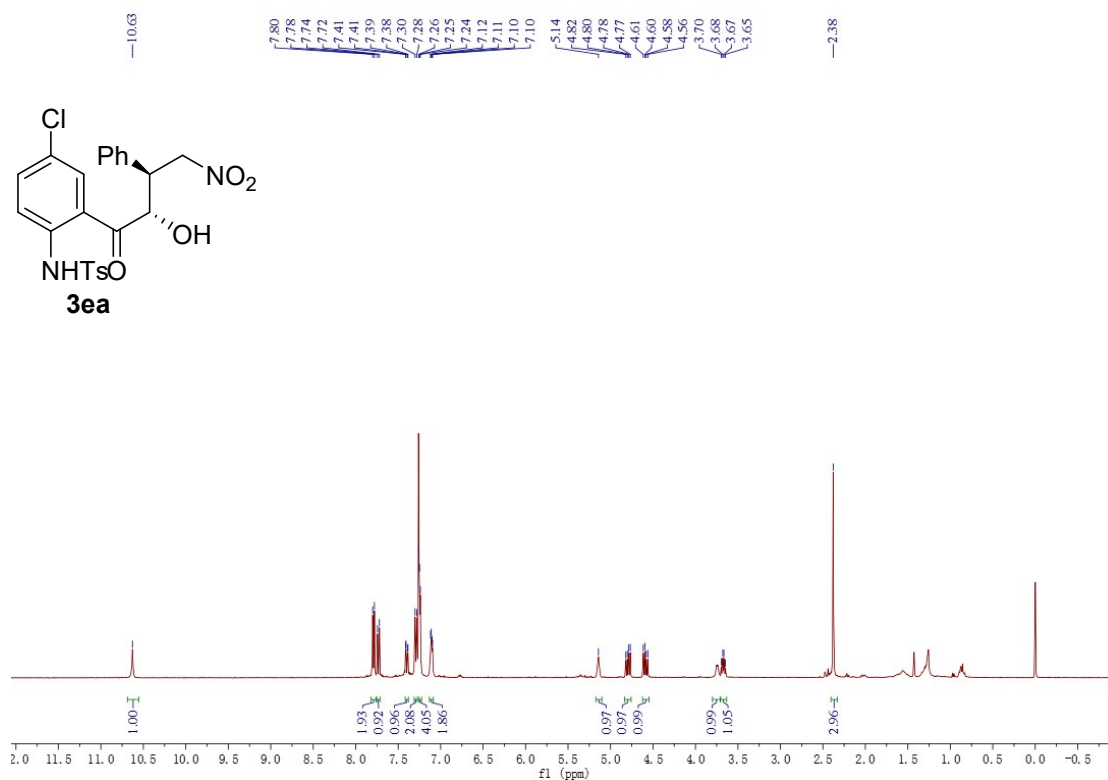

<sup>13</sup>C NMR spectrum of compound **3ea** (CDCl<sub>3</sub>, 400 MHz)

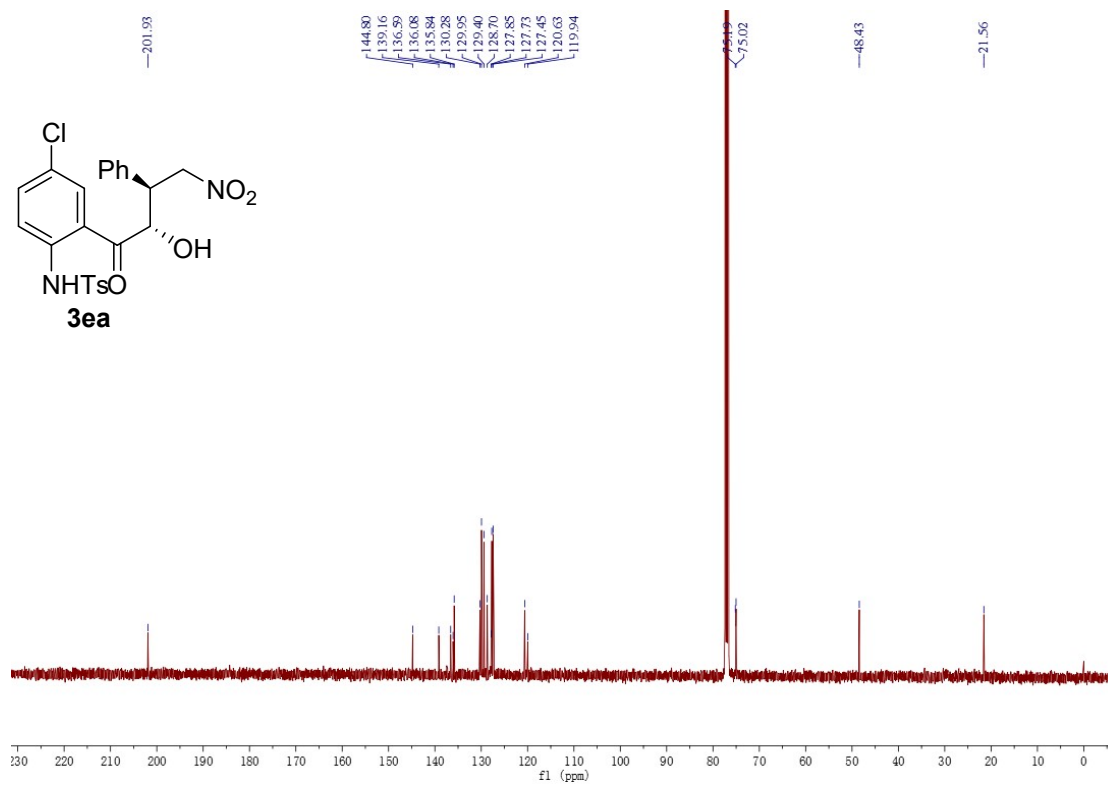



<sup>1</sup>H NMR spectrum of compound **3fa** (CDCl<sub>3</sub>, 400 MHz)

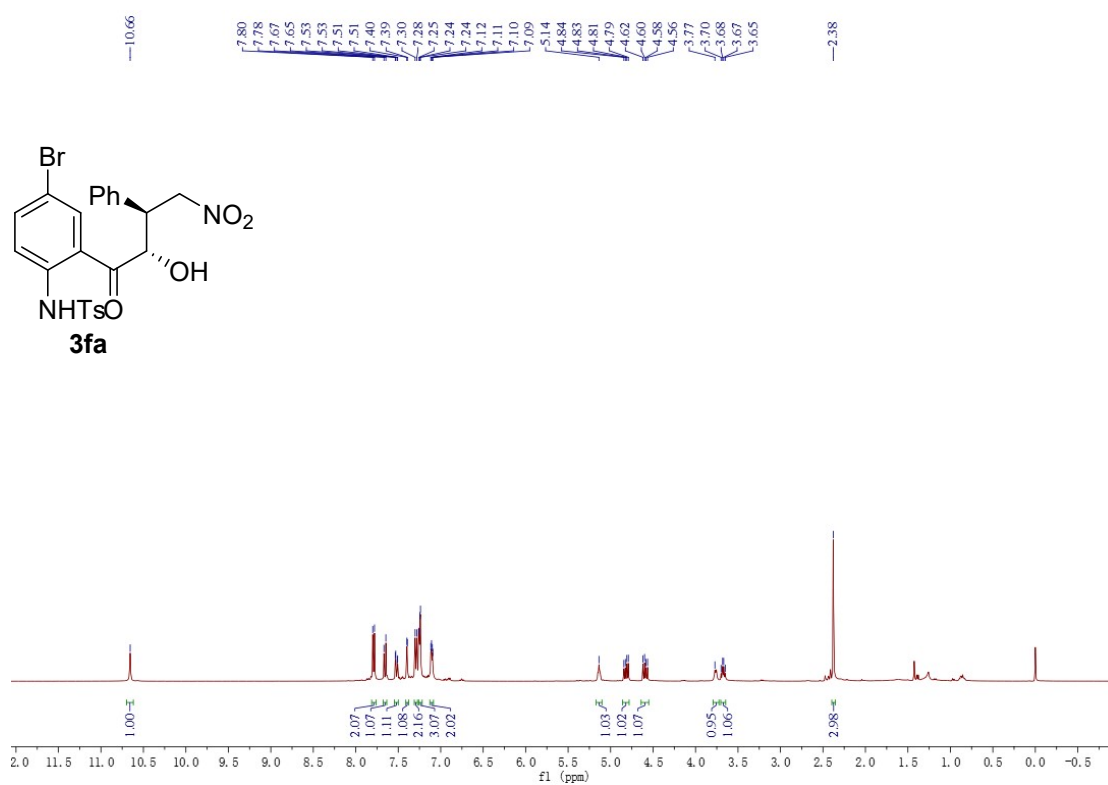

<sup>13</sup>C NMR spectrum of compound **3fa** (CDCl<sub>3</sub>, 400 MHz)

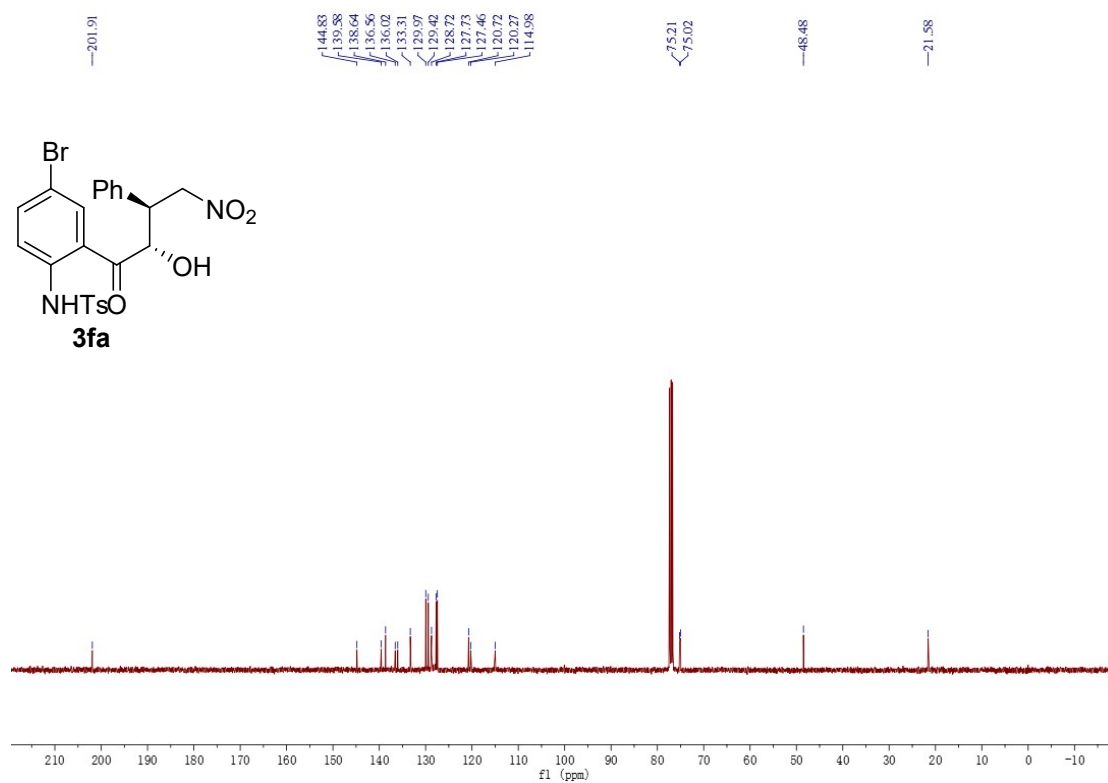

<sup>1</sup>H NMR spectrum of compound **3ga** (DMSO, 400 MHz)

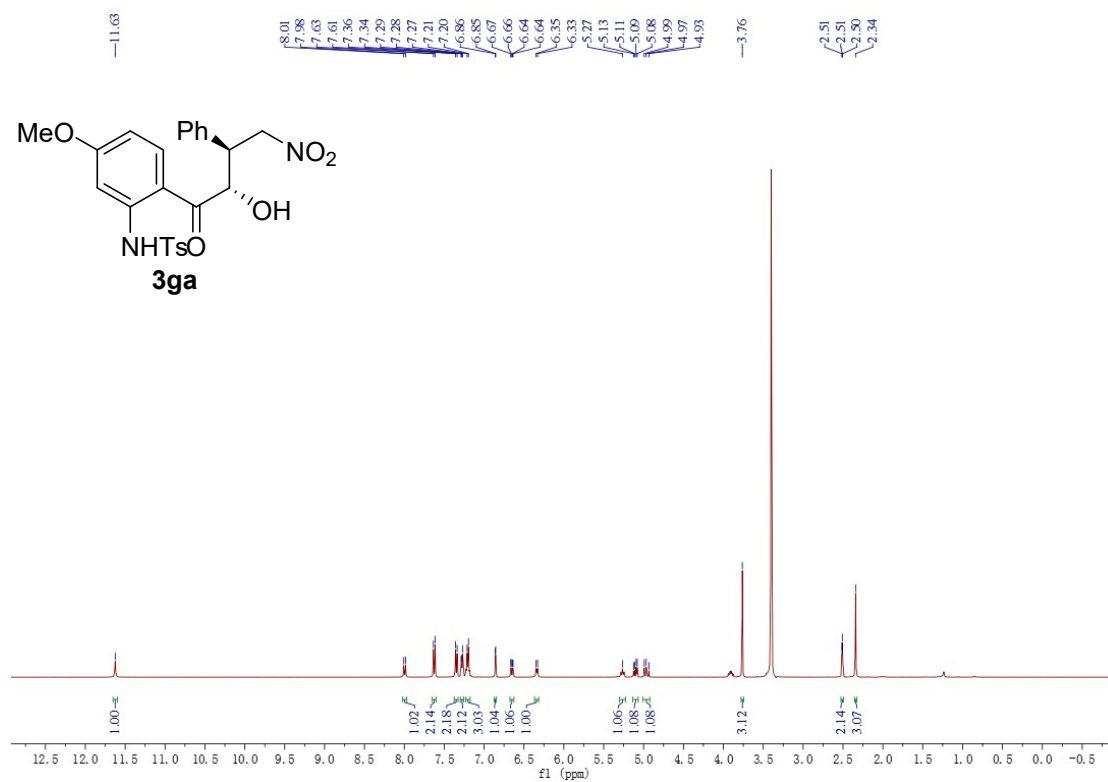

<sup>13</sup>C NMR spectrum of compound **3ga** (DMSO, 400 MHz)

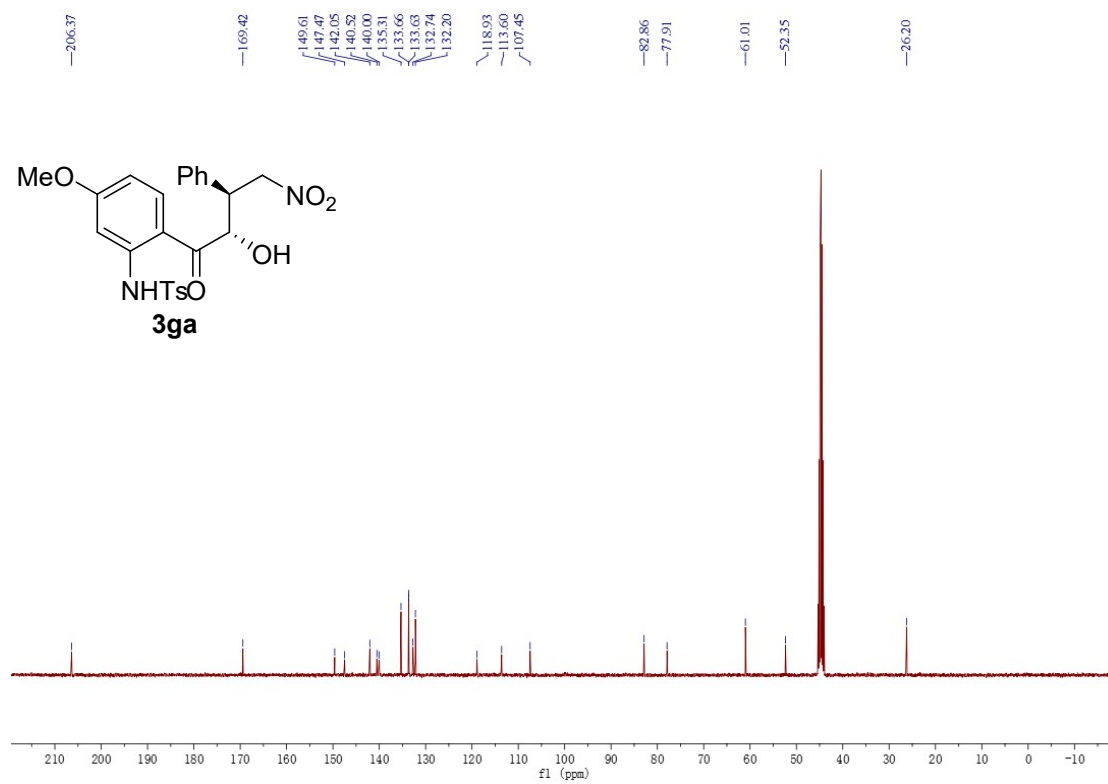

<sup>1</sup>H NMR spectrum of compound **3cb** (CDCl<sub>3</sub>, 400 MHz)

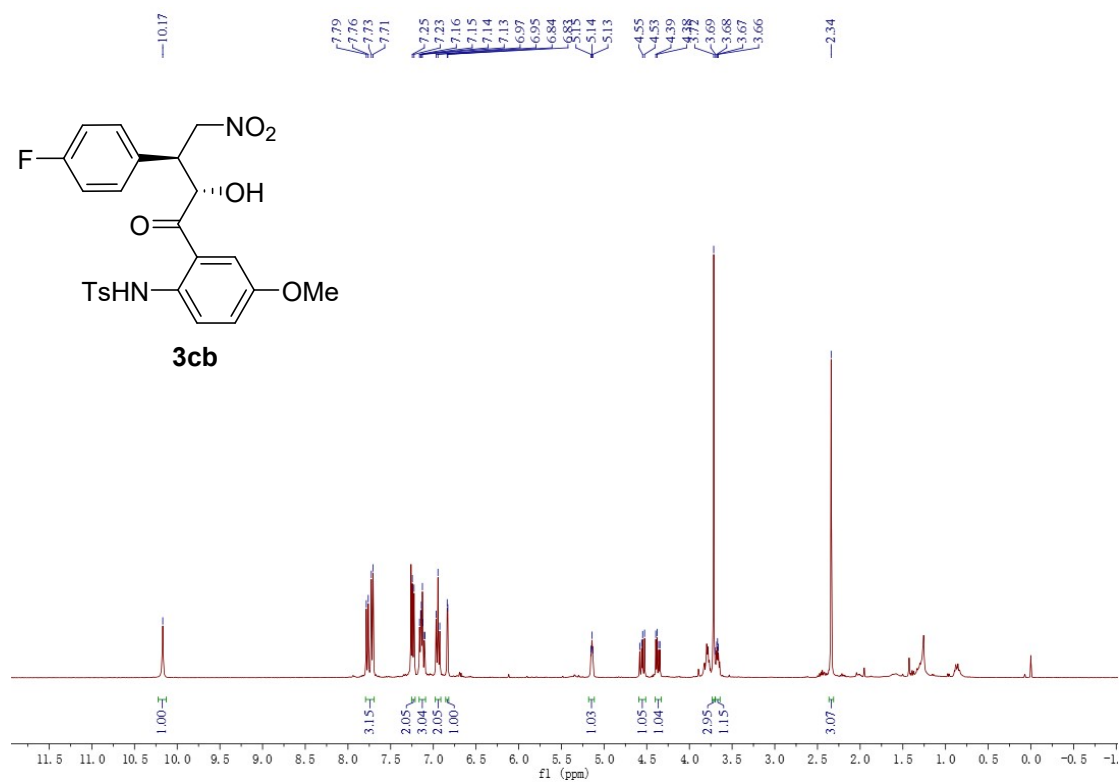

<sup>13</sup>C NMR spectrum of compound **3cb** (CDCl<sub>3</sub>, 400 MHz)

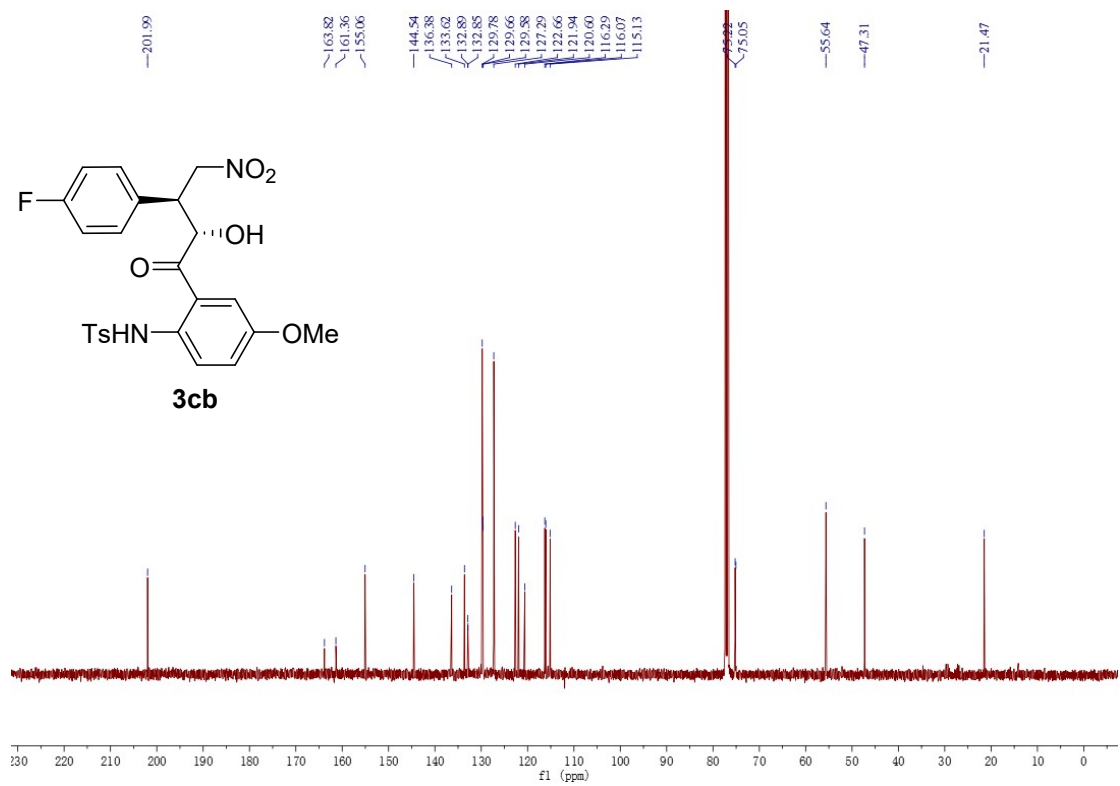

$^{19}\text{F}$  NMR spectrum of compound **3cb** ( $\text{CDCl}_3$ , 400 MHz)

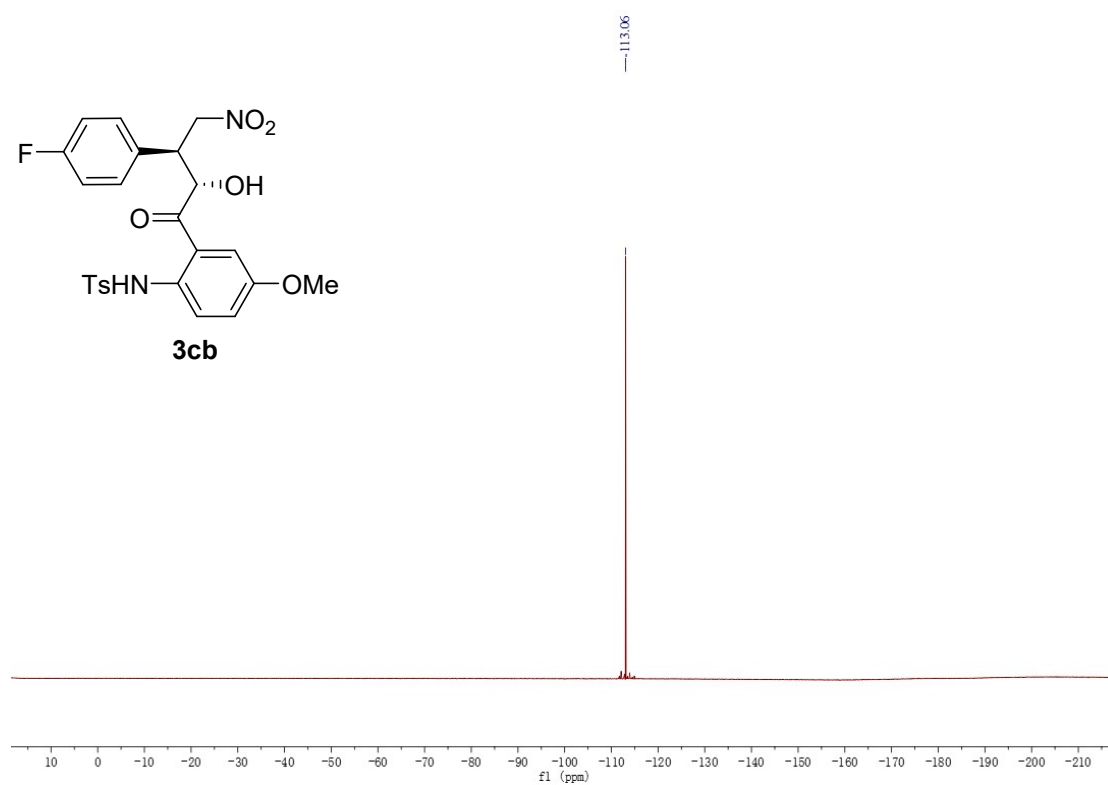

<sup>1</sup>H NMR spectrum of compound **3cc** (CDCl<sub>3</sub>, 400 MHz)

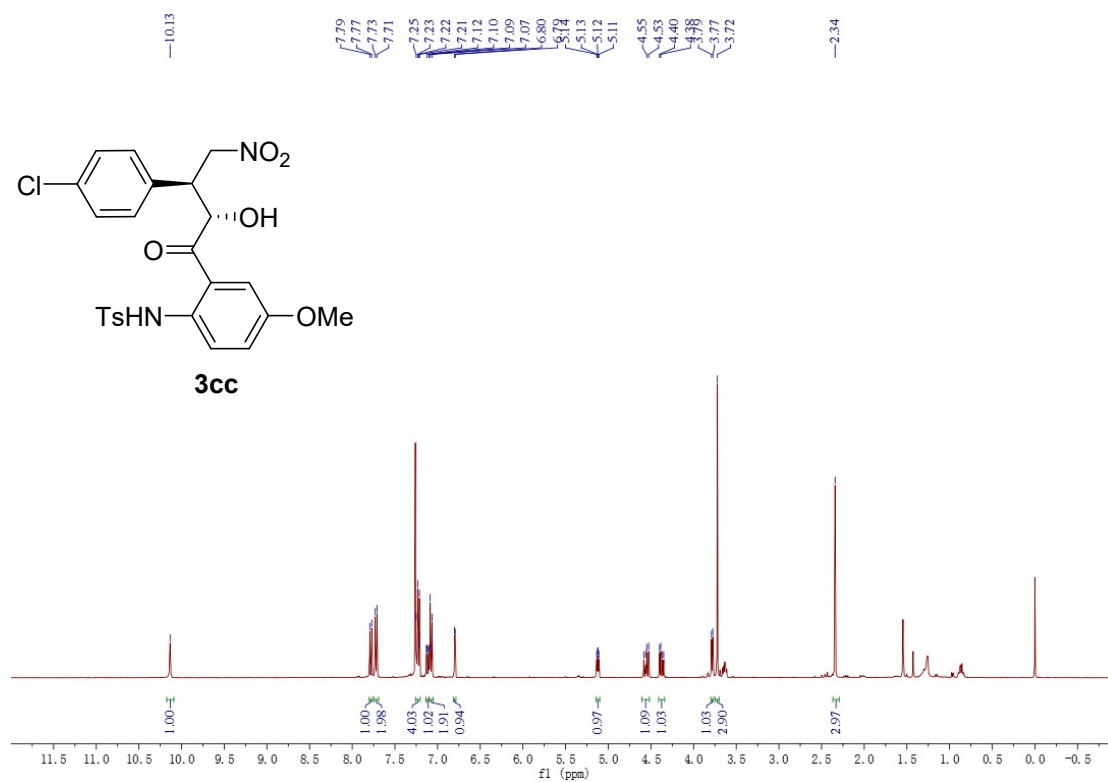

<sup>13</sup>C NMR spectrum of compound **3cc** (CDCl<sub>3</sub>, 400 MHz)

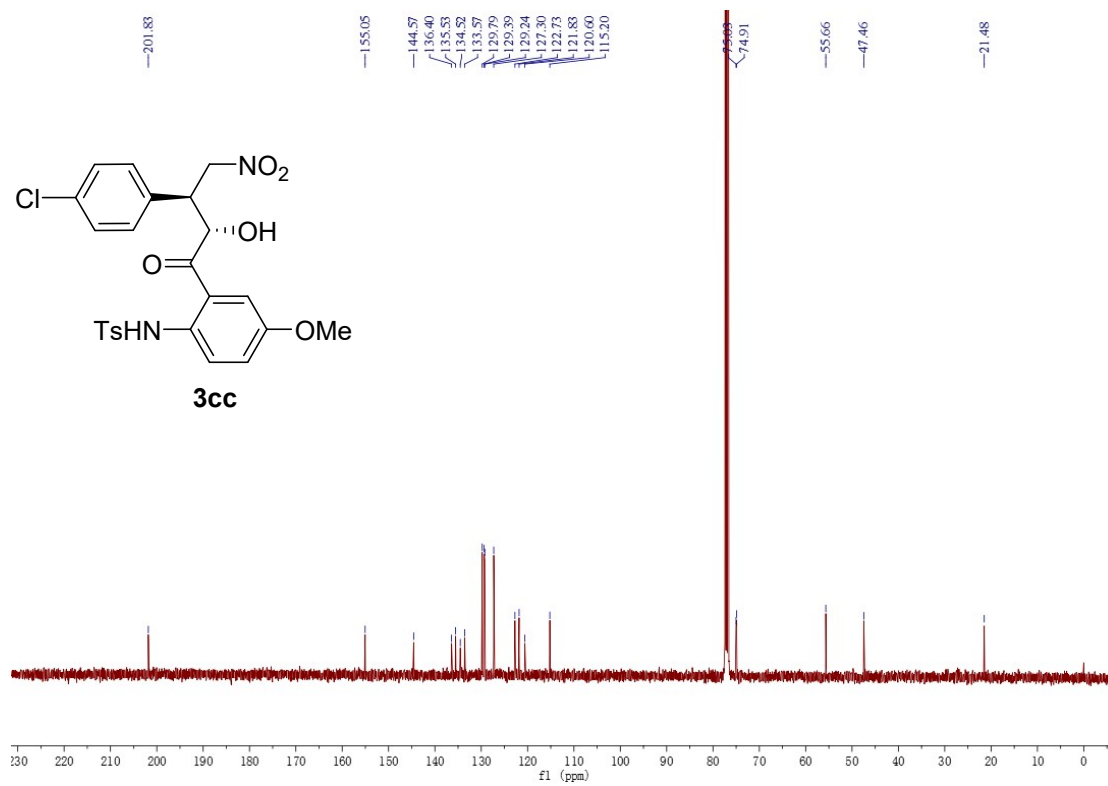

$^1\text{H}$  NMR spectrum of compound **3cd** ( $\text{CDCl}_3$ , 400 MHz)

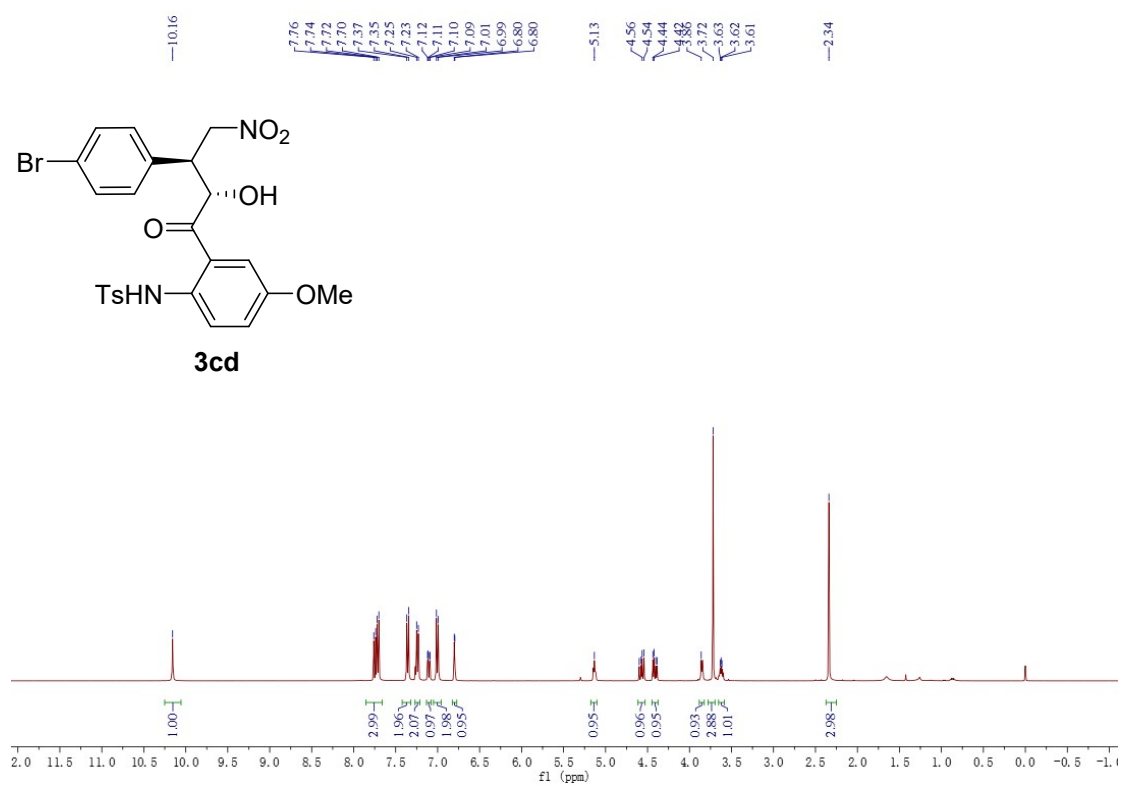

$^{13}\text{C}$  NMR spectrum of compound **3cd** ( $\text{CDCl}_3$ , 400 MHz)

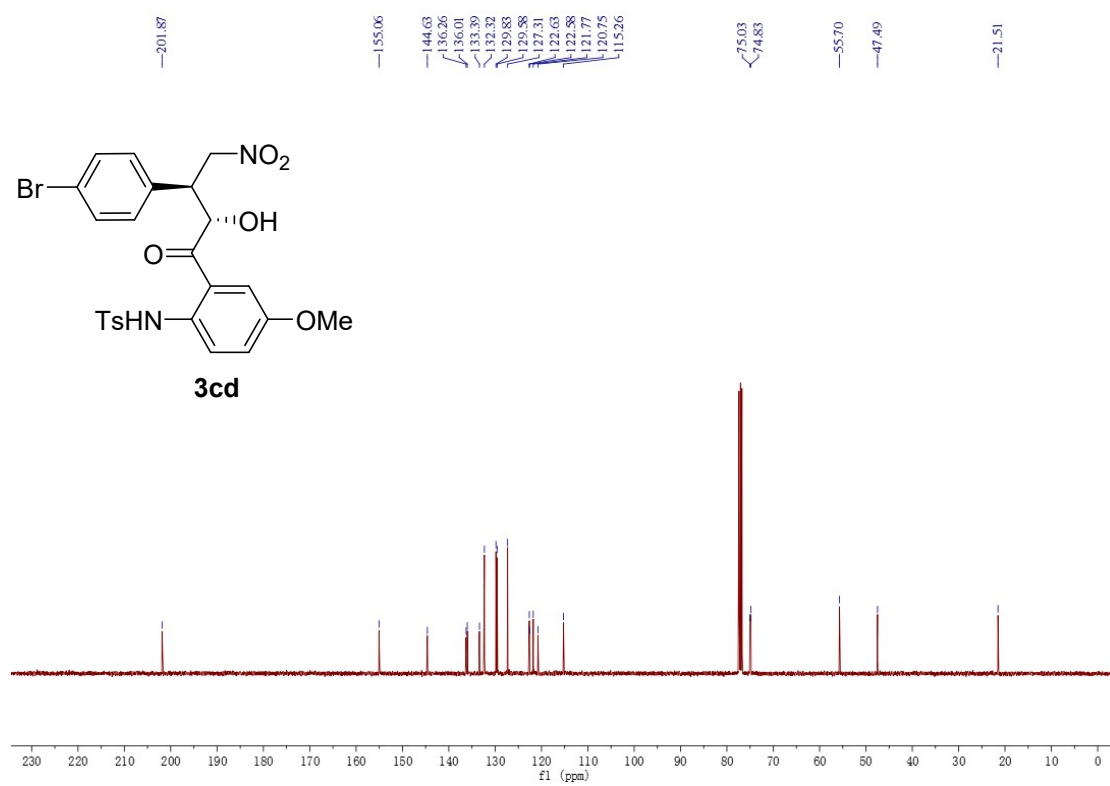

<sup>1</sup>H NMR spectrum of compound **3ce** (CDCl<sub>3</sub>, 400 MHz)

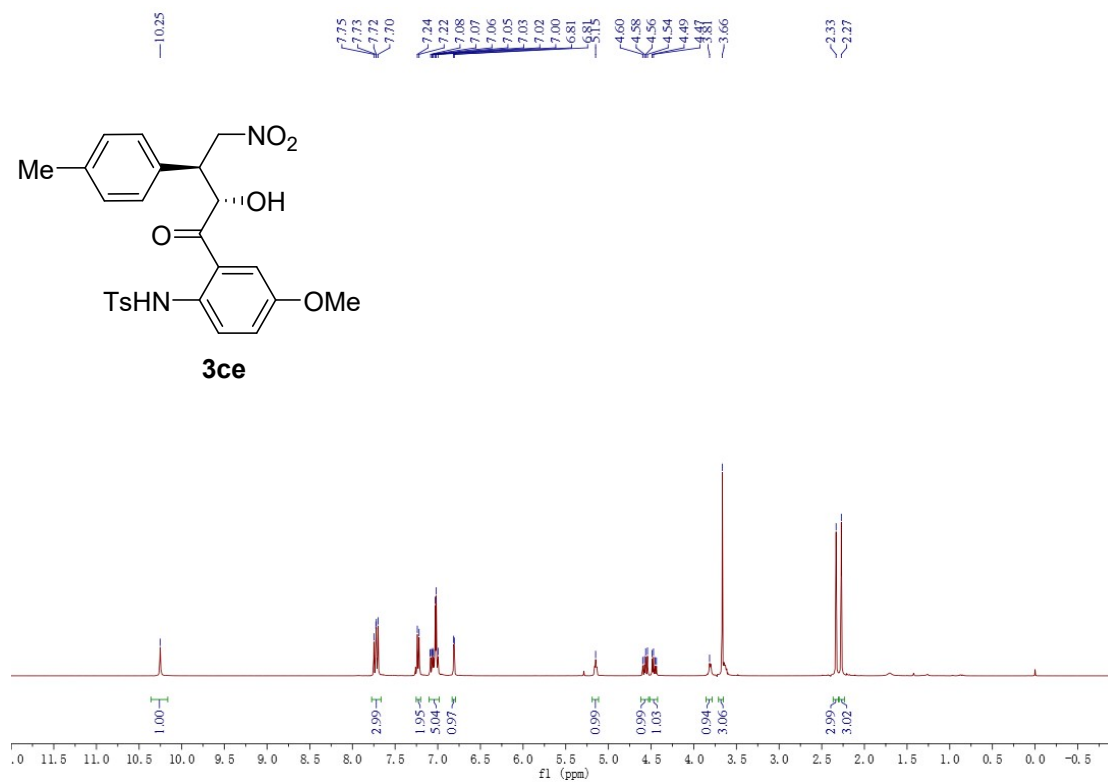

<sup>13</sup>C NMR spectrum of compound **3ce** (CDCl<sub>3</sub>, 400 MHz)

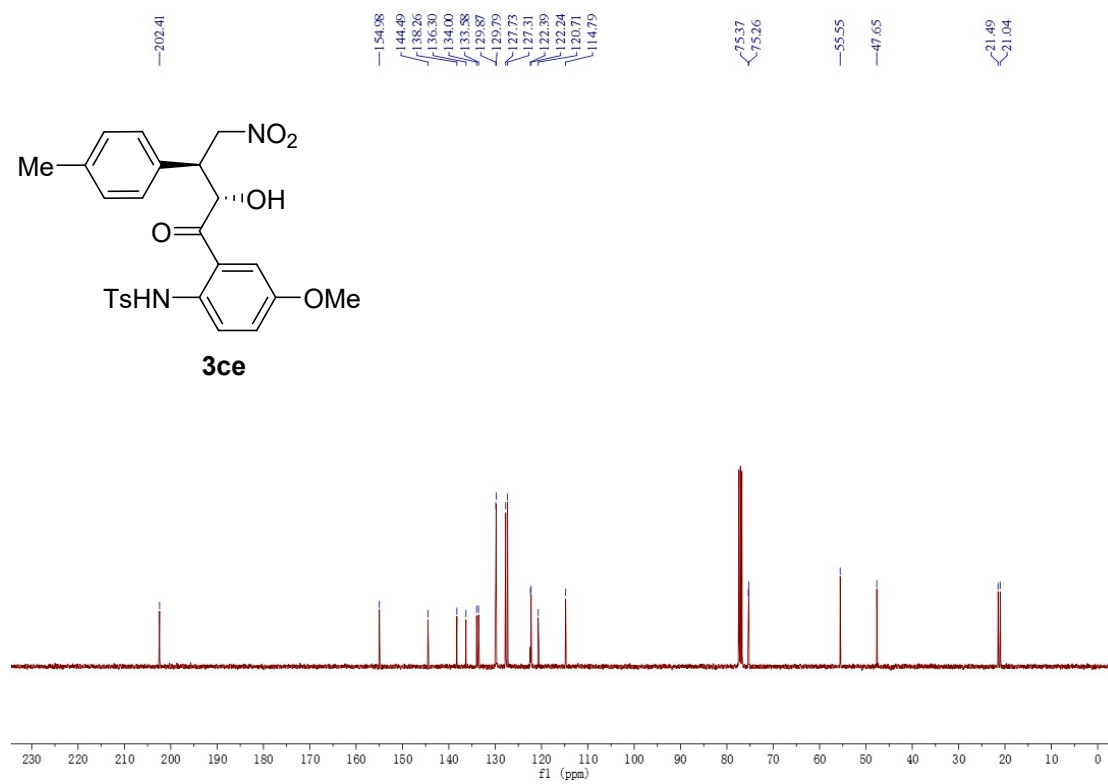

<sup>1</sup>H NMR spectrum of compound **3cf** (CDCl<sub>3</sub>, 400 MHz)

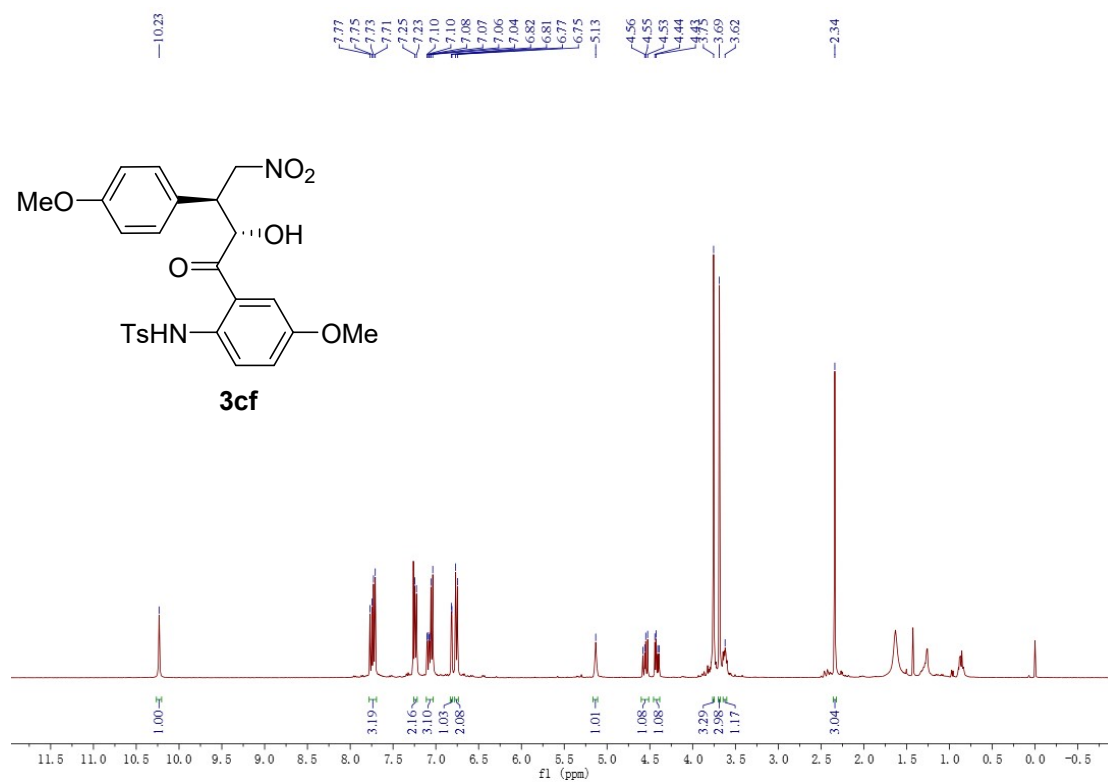

<sup>13</sup>C NMR spectrum of compound **3cf** (CDCl<sub>3</sub>, 400 MHz)

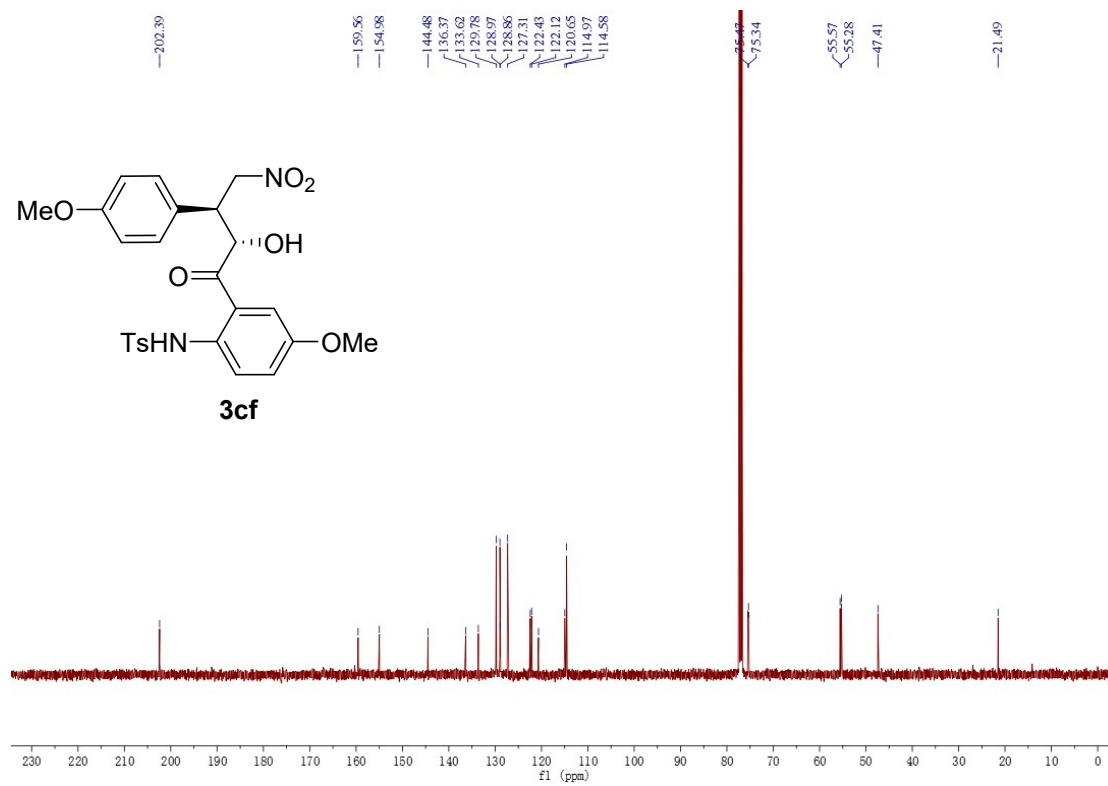



<sup>1</sup>H NMR spectrum of compound **3cg** (CDCl<sub>3</sub>, 400 MHz)

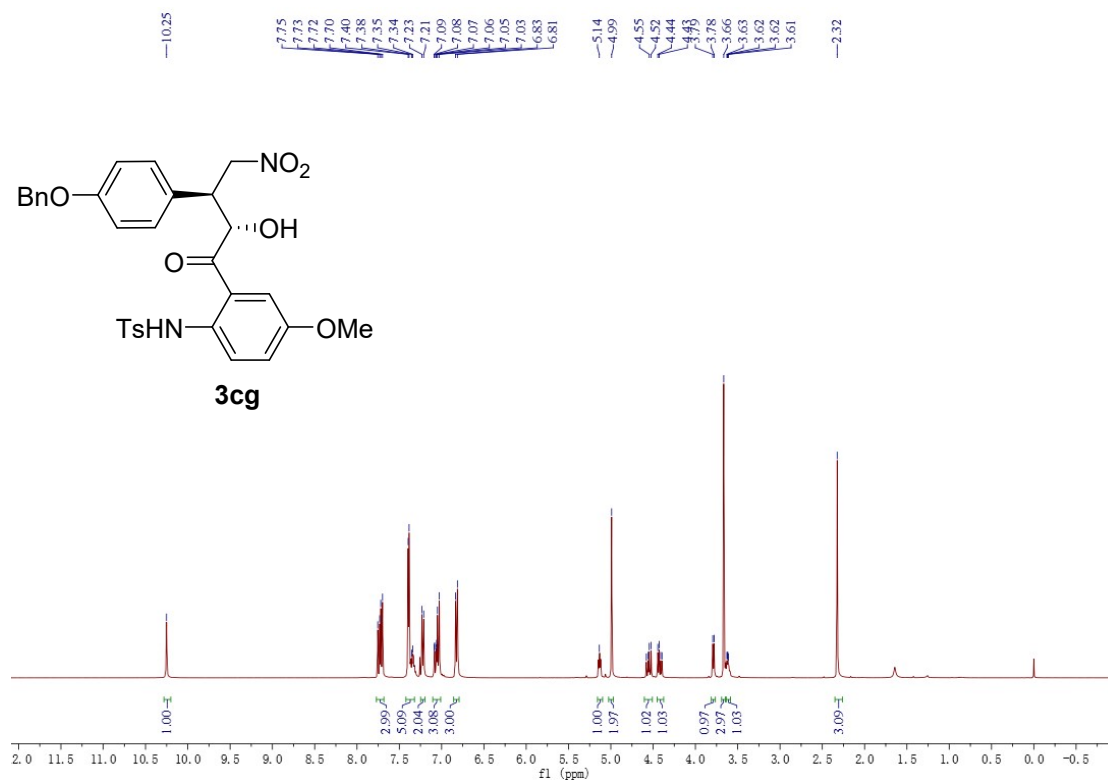

<sup>13</sup>C NMR spectrum of compound **3cg** (CDCl<sub>3</sub>, 400 MHz)

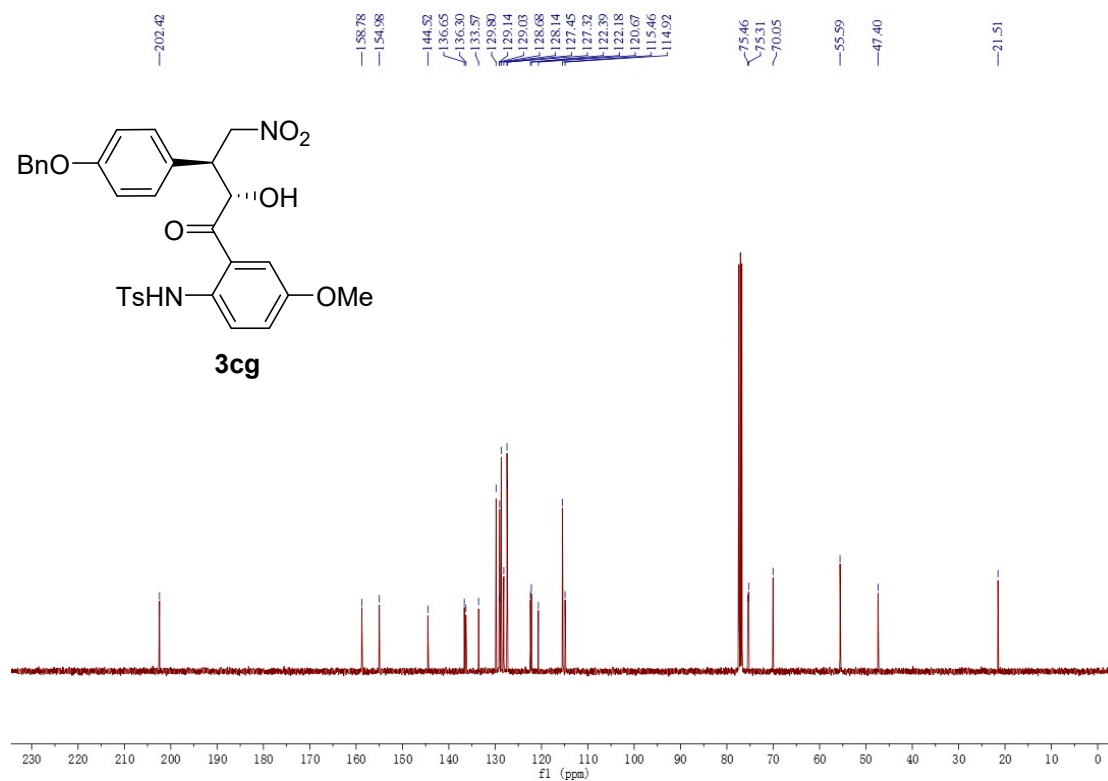

<sup>1</sup>H NMR spectrum of compound **3ch** (CDCl<sub>3</sub>, 400 MHz)

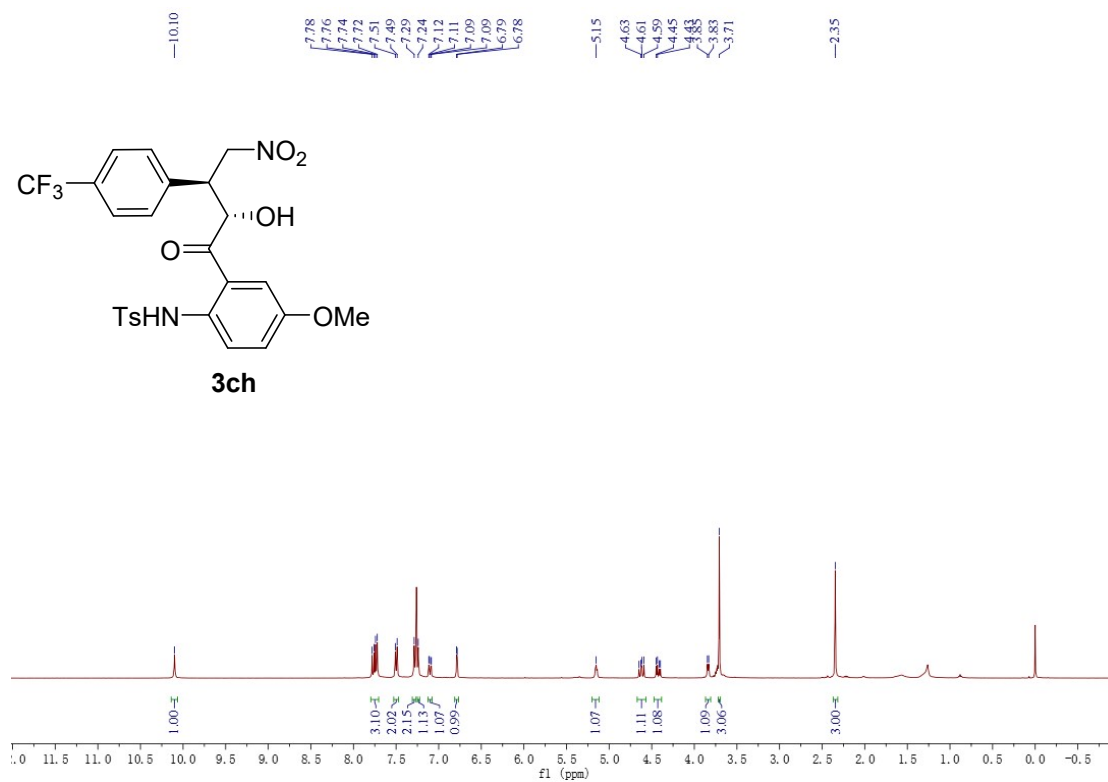

<sup>13</sup>C NMR spectrum of compound **3ch** (CDCl<sub>3</sub>, 400 MHz)

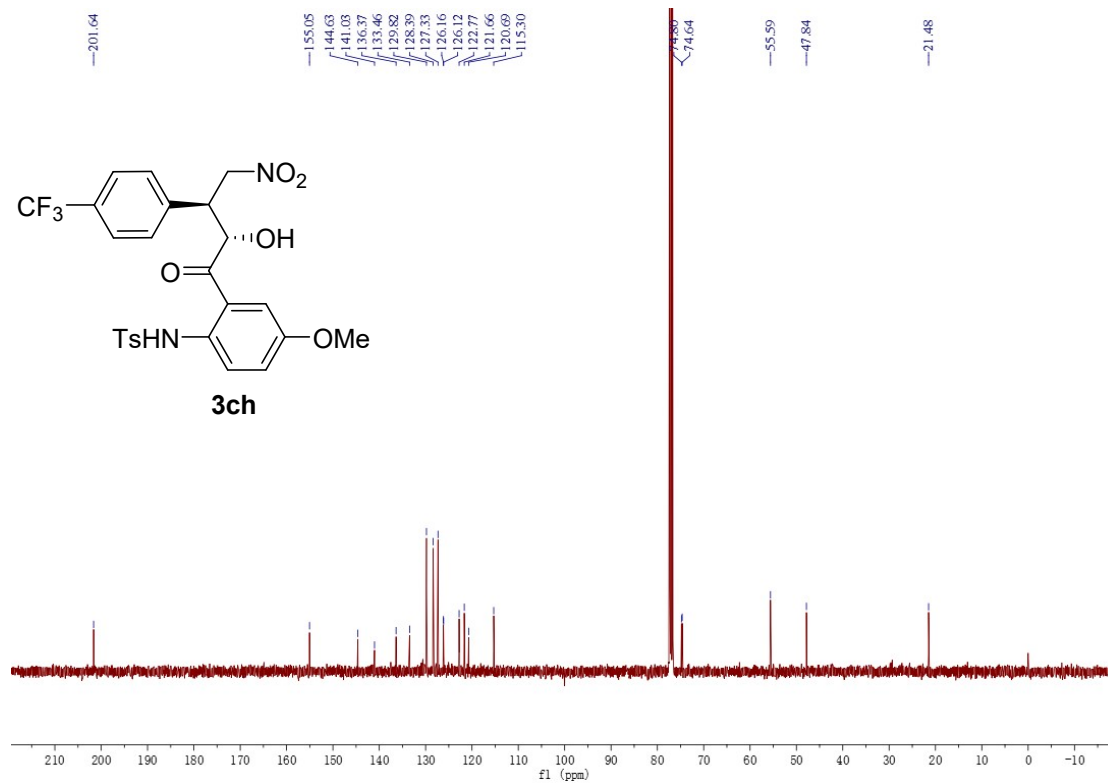

$^{19}\text{F}$  NMR spectrum of compound **3ch** ( $\text{CDCl}_3$ , 400 MHz)

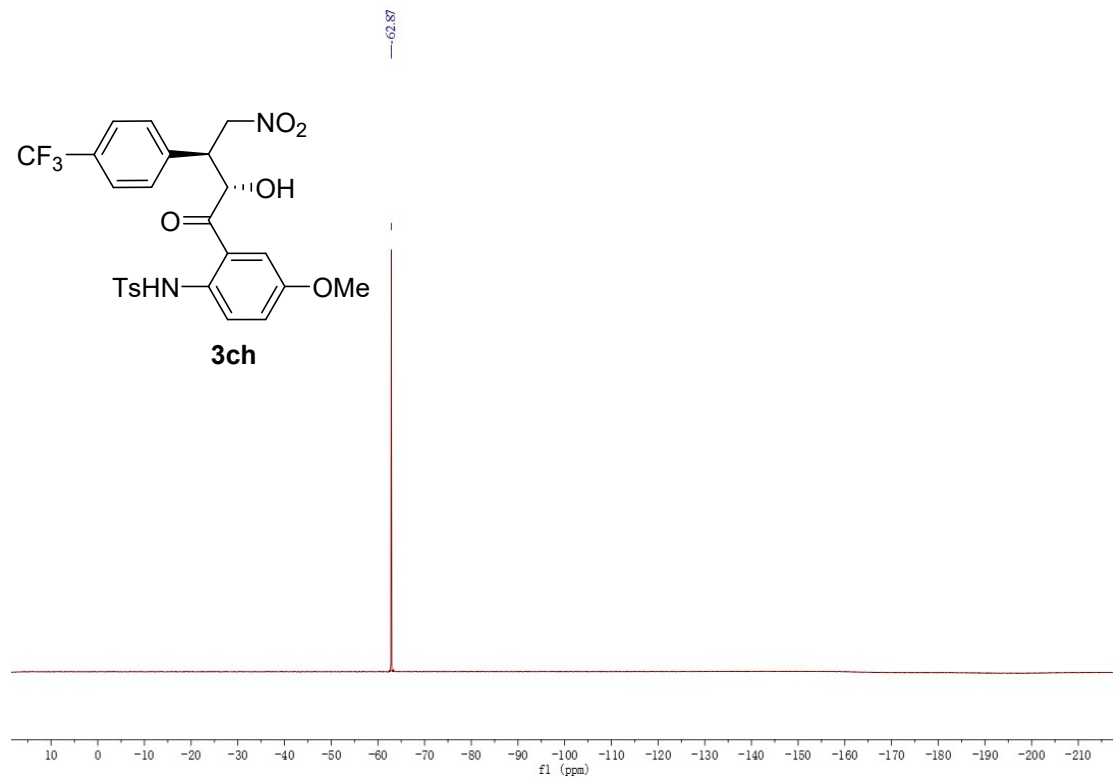

<sup>1</sup>H NMR spectrum of compound **3ci** (DMSO, 400 MHz)

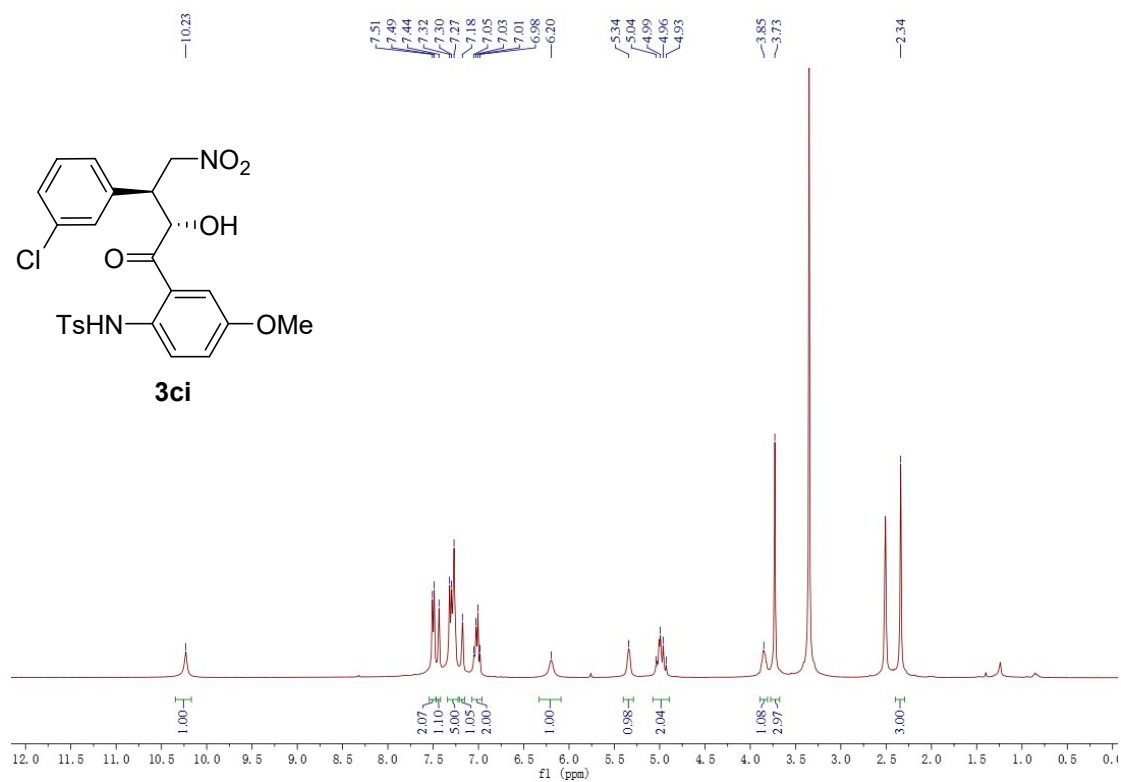

<sup>13</sup>C NMR spectrum of compound **3ci** (DMSO, 400 MHz)

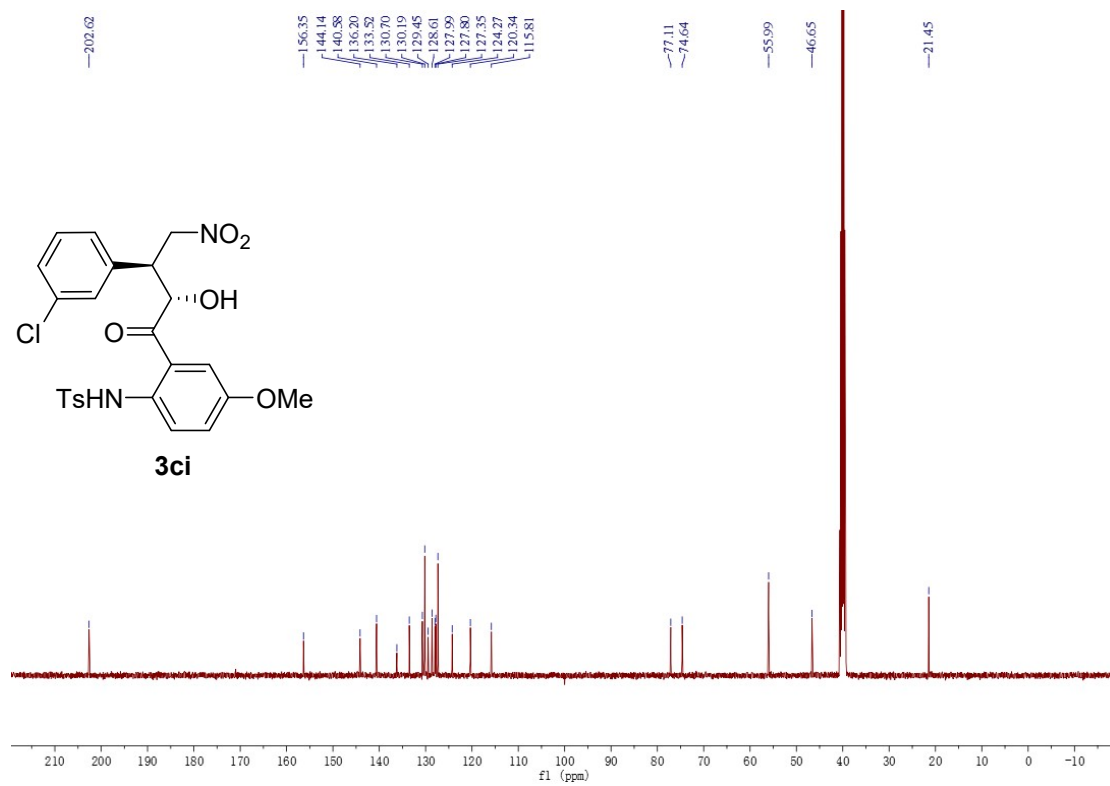

<sup>1</sup>H NMR spectrum of compound **3cj** (CDCl<sub>3</sub>, 400 MHz)

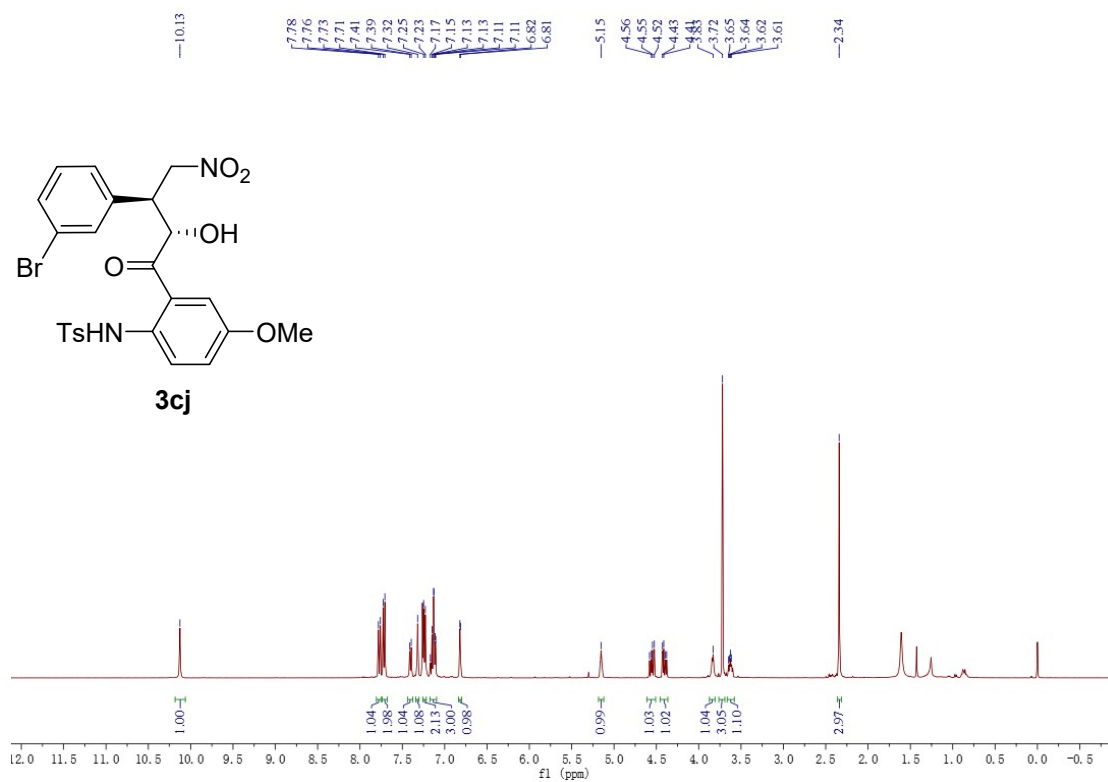

<sup>13</sup>C NMR spectrum of compound **3cj** (CDCl<sub>3</sub>, 400 MHz)

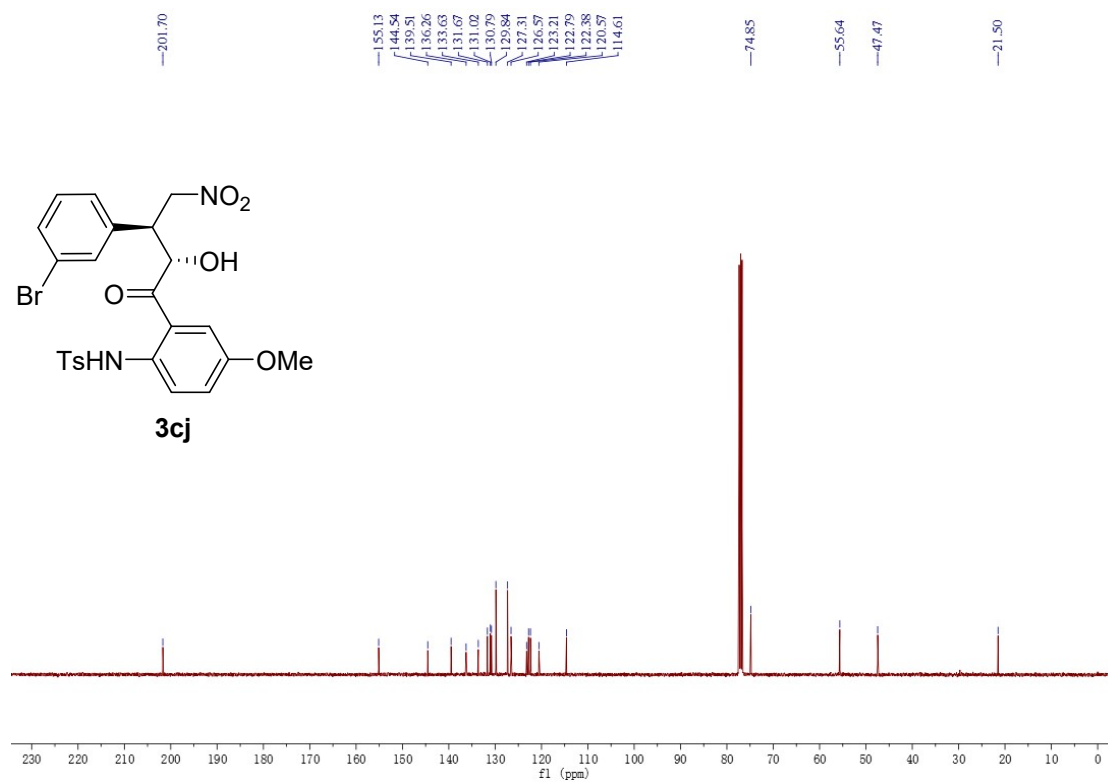

<sup>1</sup>H NMR spectrum of compound **3ck** (CDCl<sub>3</sub>, 400 MHz)

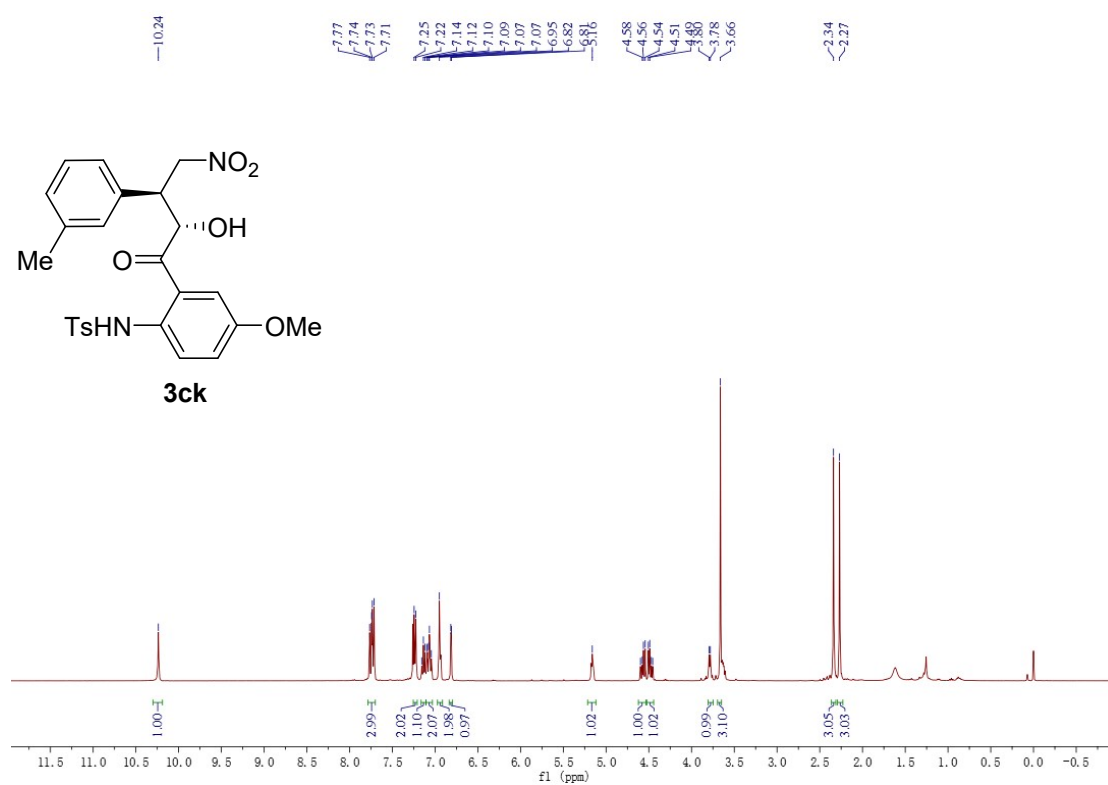

<sup>13</sup>C NMR spectrum of compound **3ck** (CDCl<sub>3</sub>, 400 MHz)

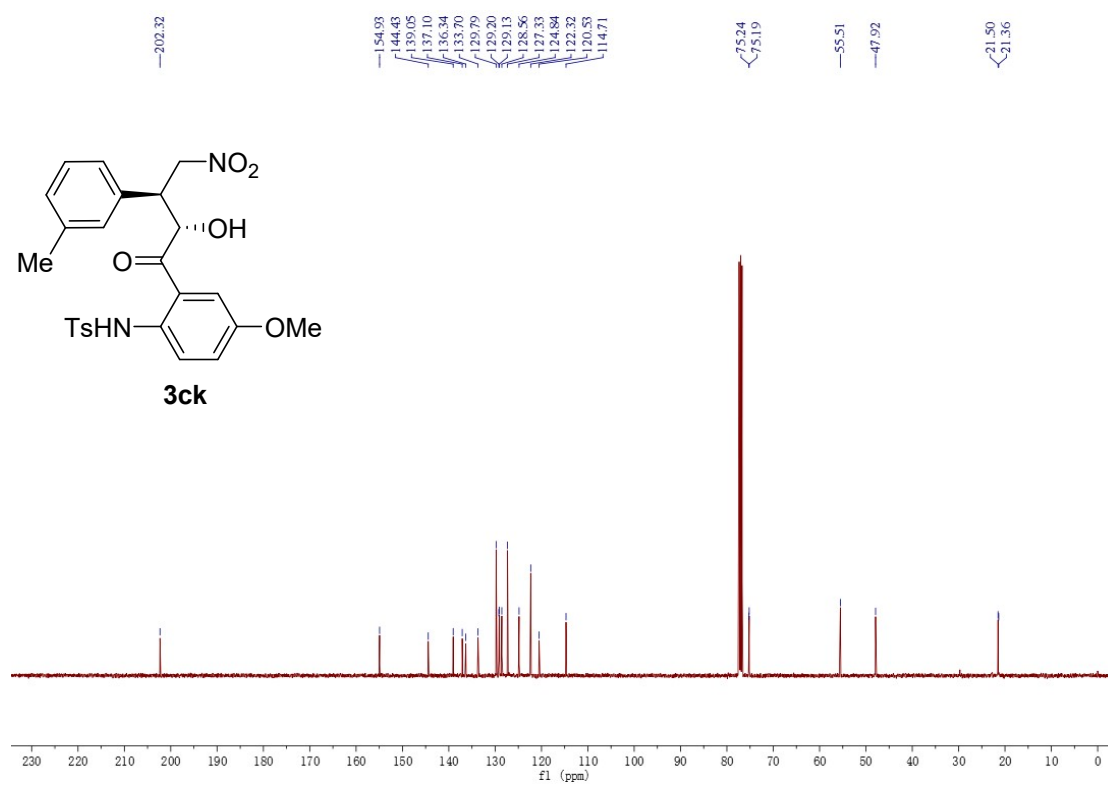

<sup>1</sup>H NMR spectrum of compound **3cl** (CDCl<sub>3</sub>, 400 MHz)

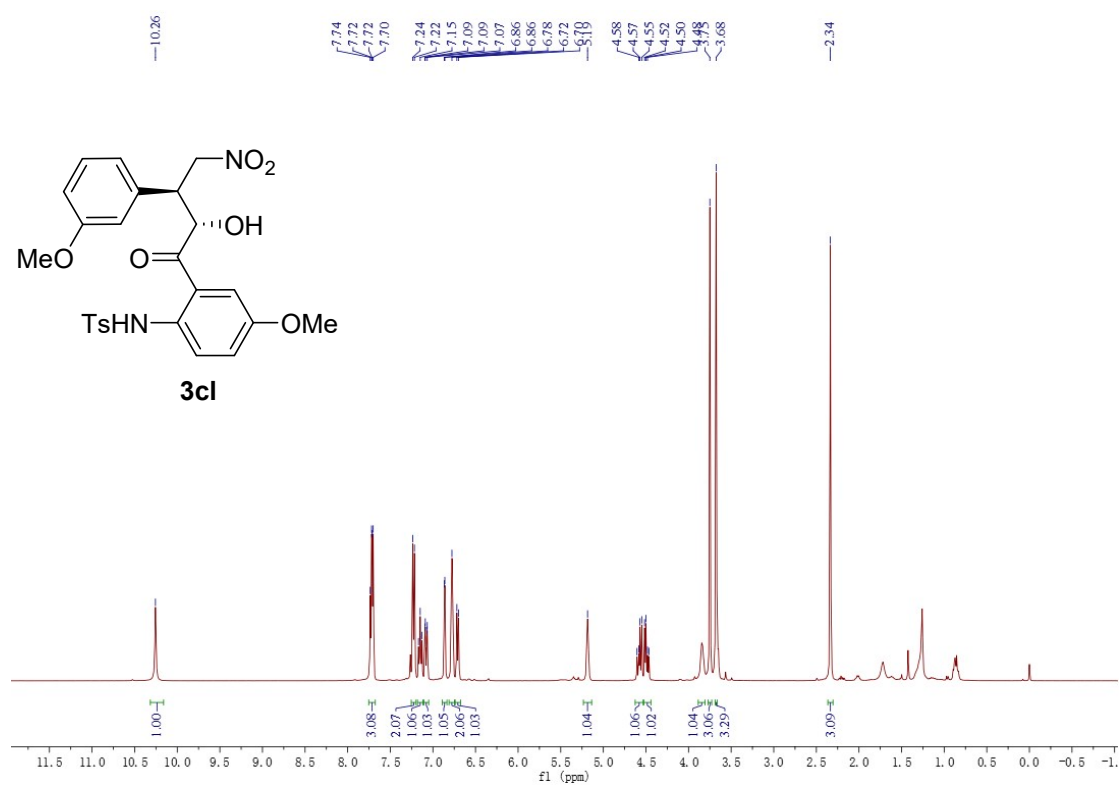

<sup>13</sup>C NMR spectrum of compound **3cl** (CDCl<sub>3</sub>, 400 MHz)

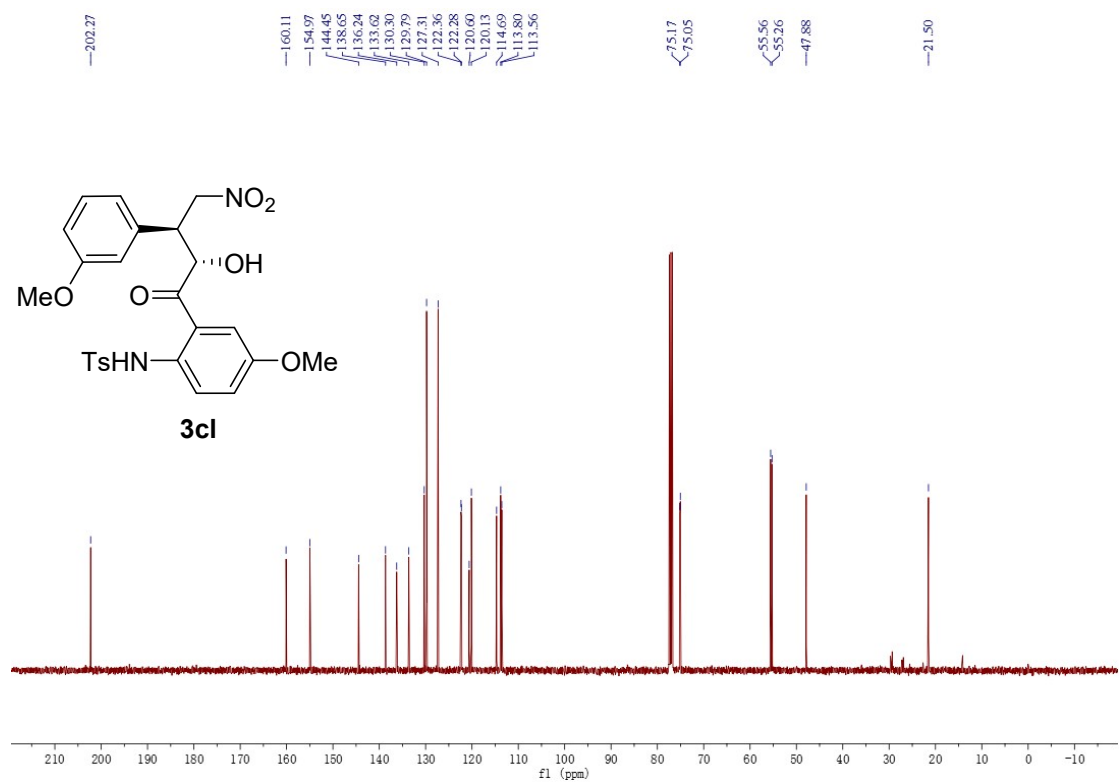

$^1\text{H}$  NMR spectrum of compound **3cm** ( $\text{CDCl}_3$ , 400 MHz)

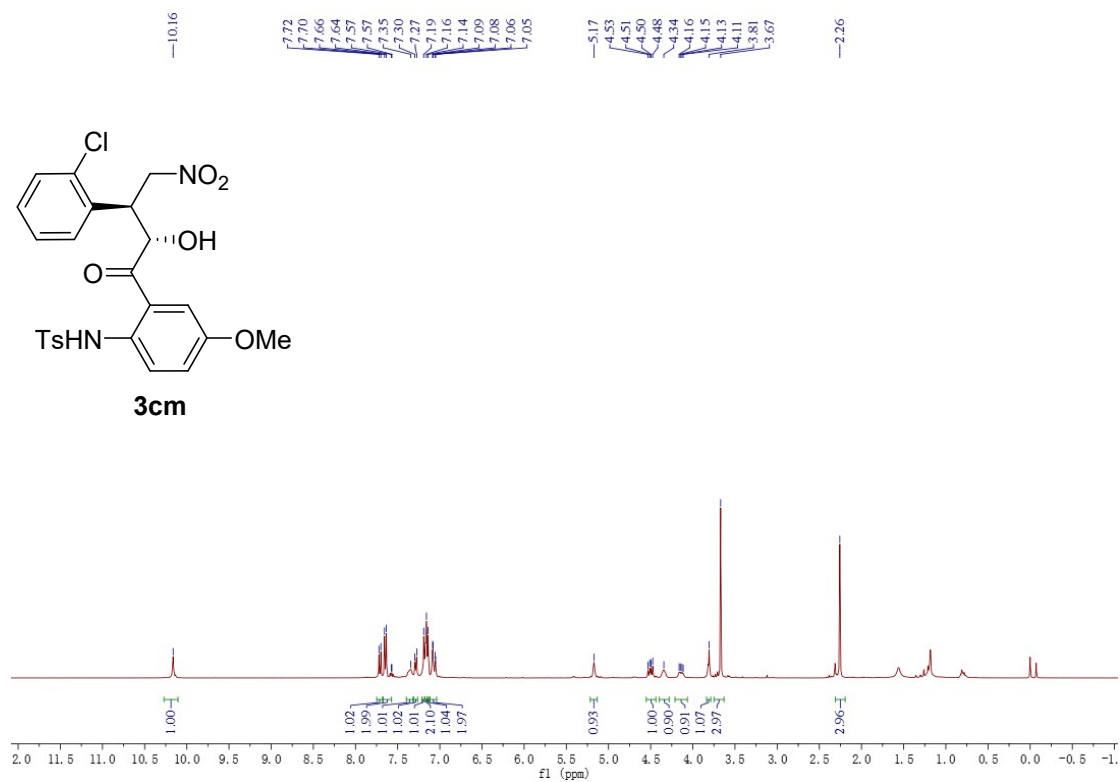

$^{13}\text{C}$  NMR spectrum of compound **3cm** ( $\text{CDCl}_3$ , 400 MHz)

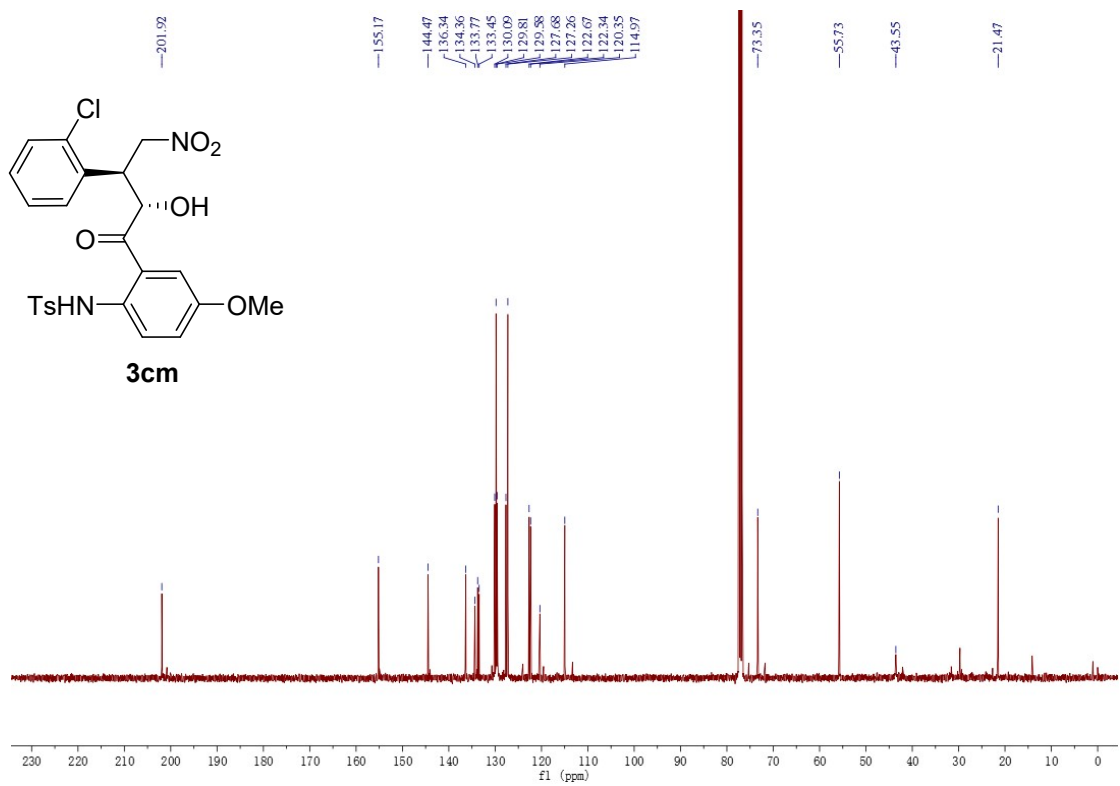



<sup>1</sup>H NMR spectrum of compound **3cn** (DMSO, 400 MHz)

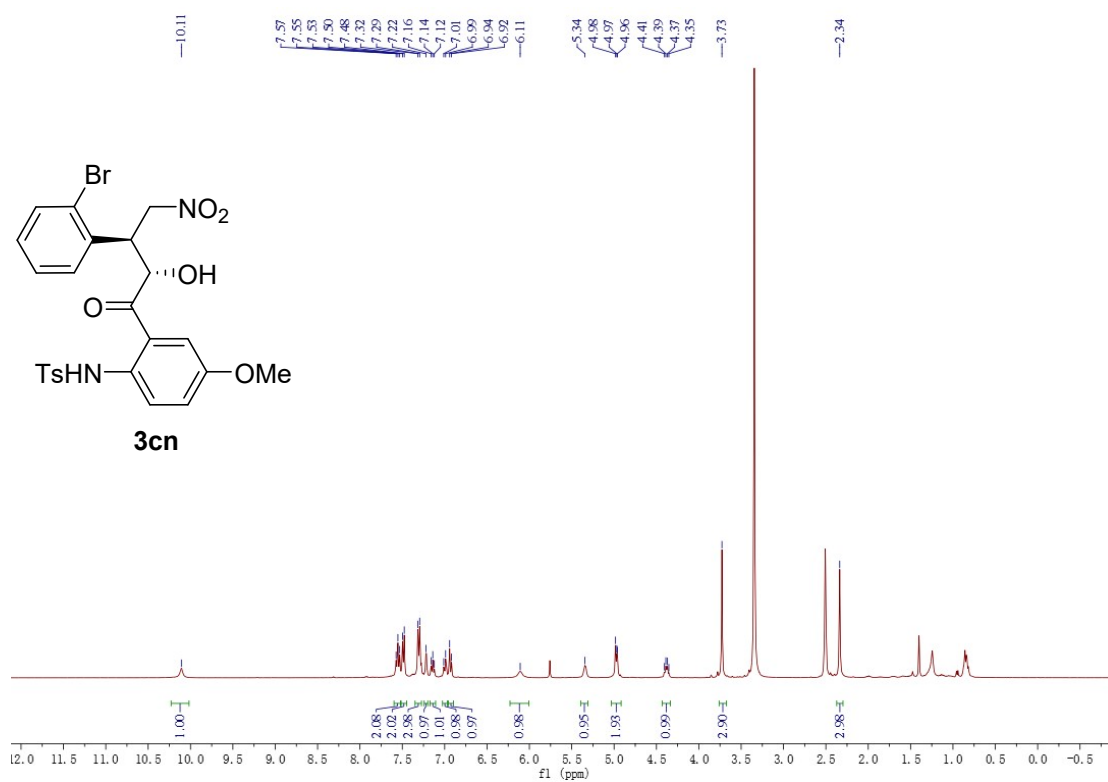

<sup>13</sup>C NMR spectrum of compound **3cn** (DMSO, 400 MHz)

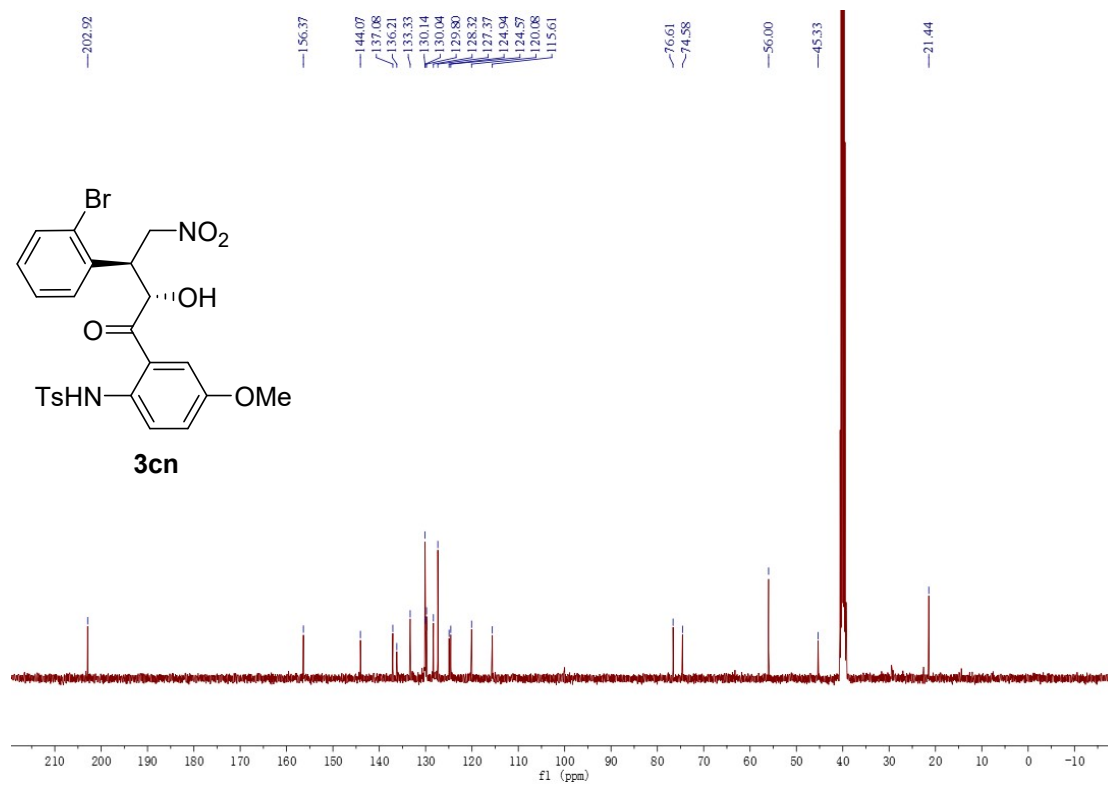

<sup>1</sup>H NMR spectrum of compound **3co** (CDCl<sub>3</sub>, 400 MHz)

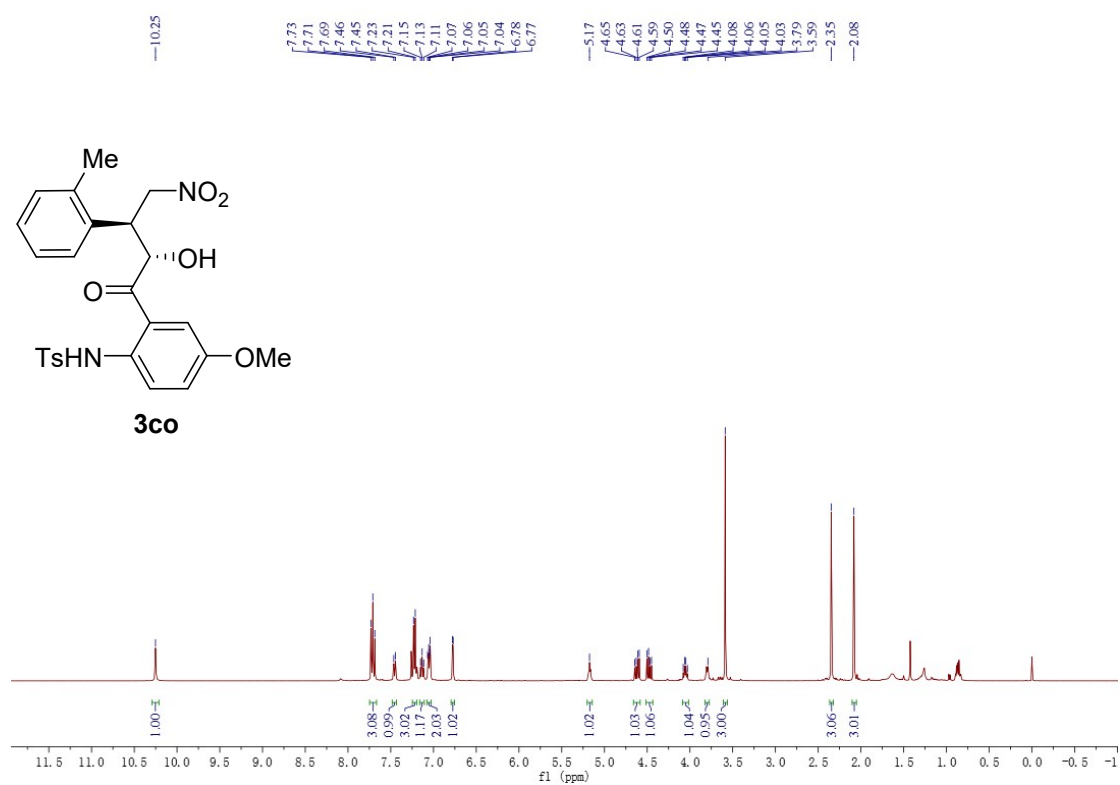

<sup>13</sup>C NMR spectrum of compound **3co** (CDCl<sub>3</sub>, 400 MHz)

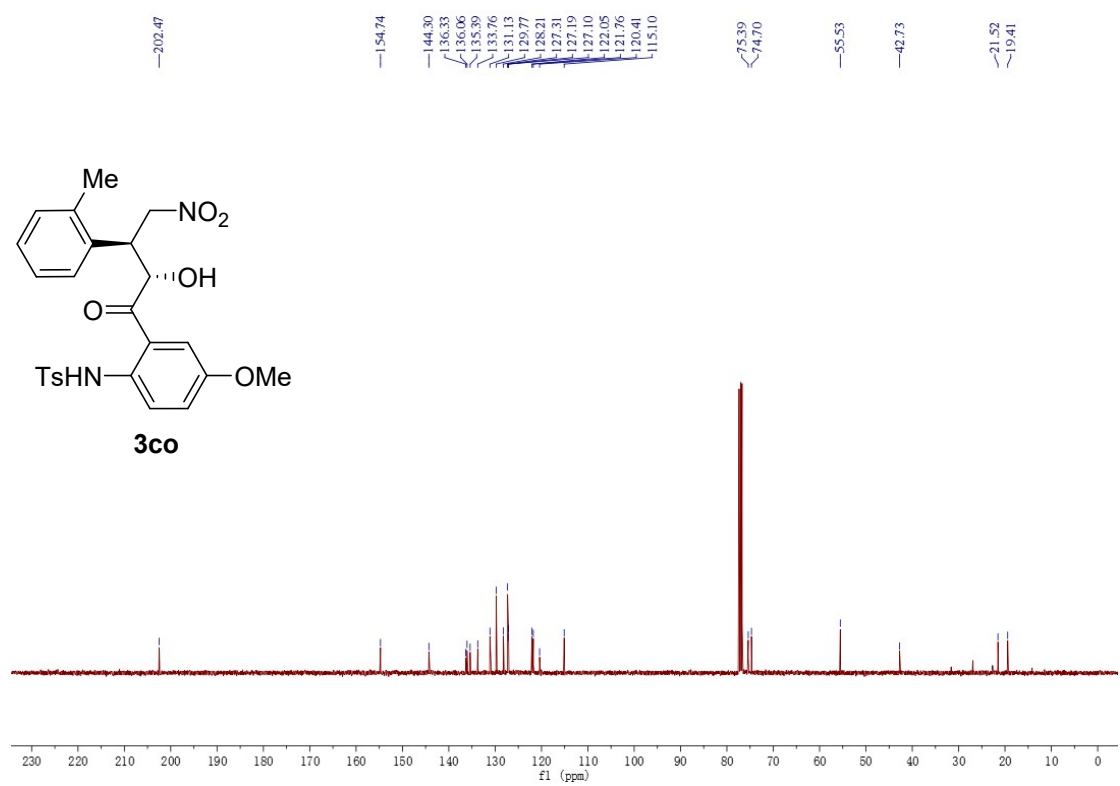

<sup>1</sup>H NMR spectrum of compound **3cp** (CDCl<sub>3</sub>, 400 MHz)

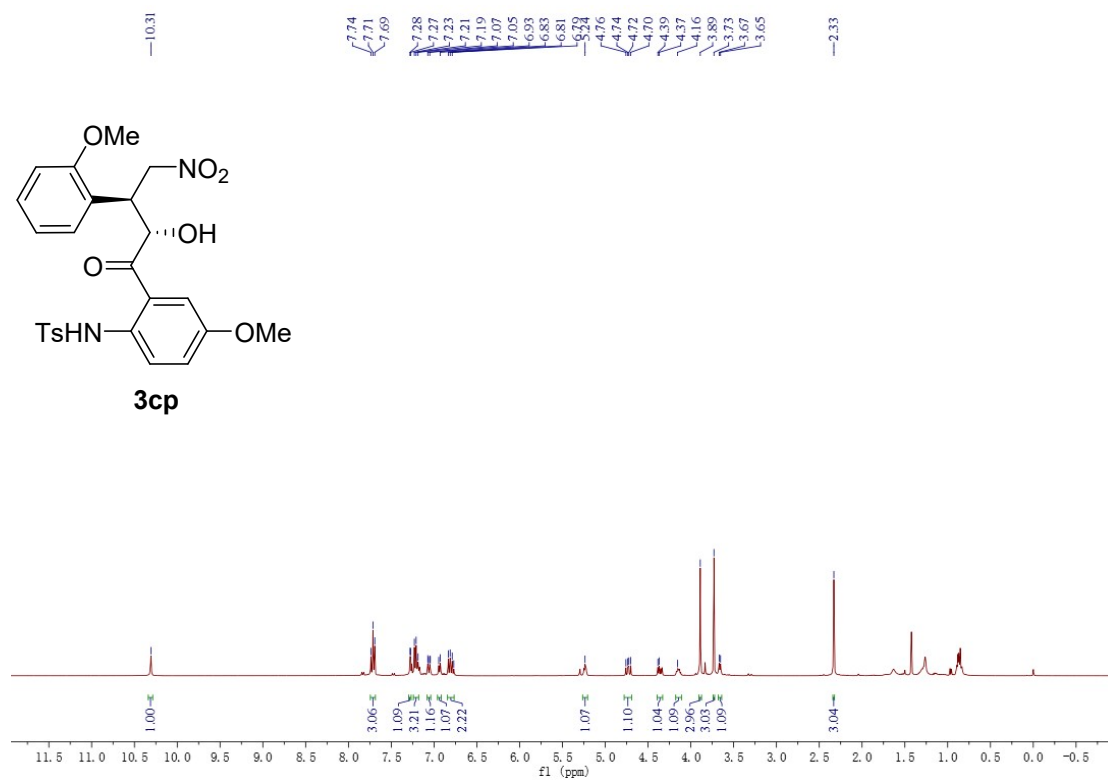

<sup>13</sup>C NMR spectrum of compound **3cp** (CDCl<sub>3</sub>, 400 MHz)

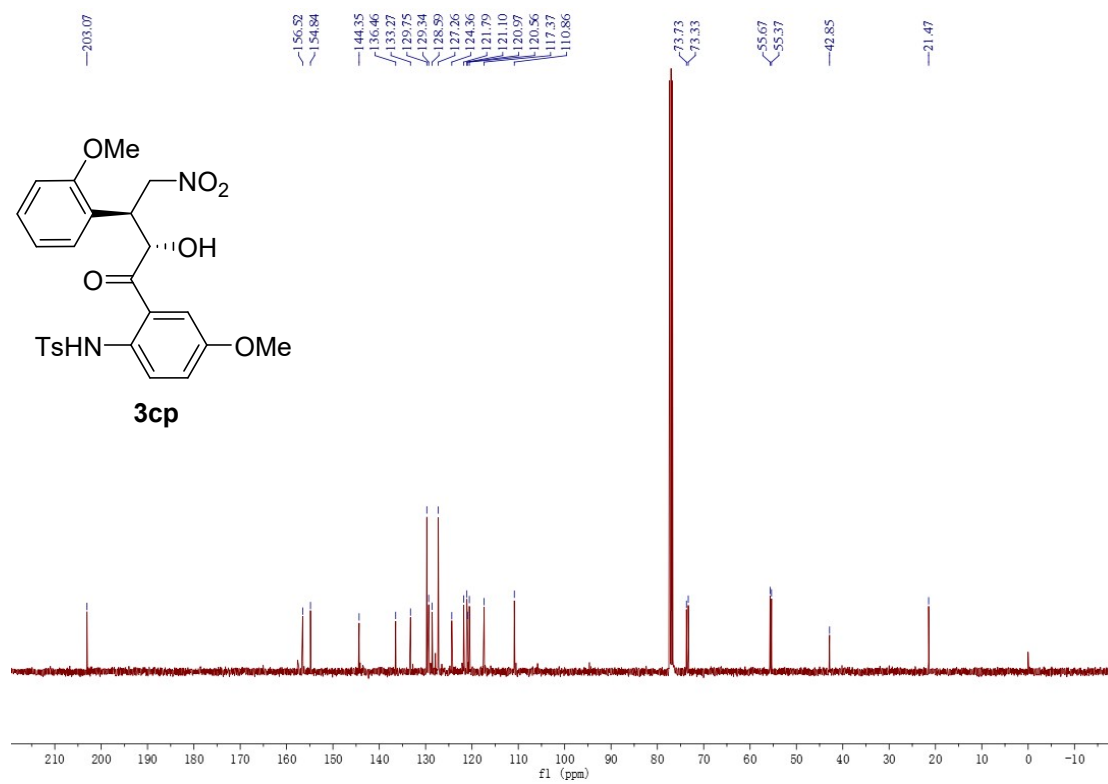

<sup>1</sup>H NMR spectrum of compound **3cq** (CDCl<sub>3</sub>, 400 MHz)

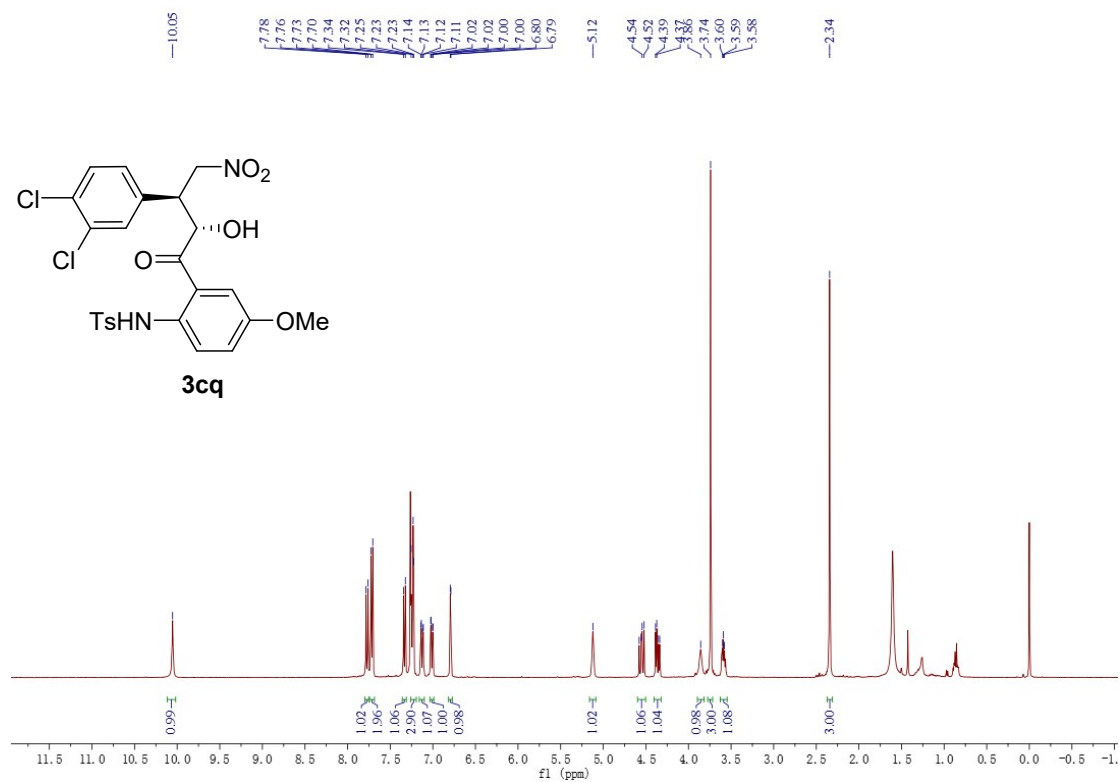

<sup>13</sup>C NMR spectrum of compound **3cq** (CDCl<sub>3</sub>, 400 MHz)

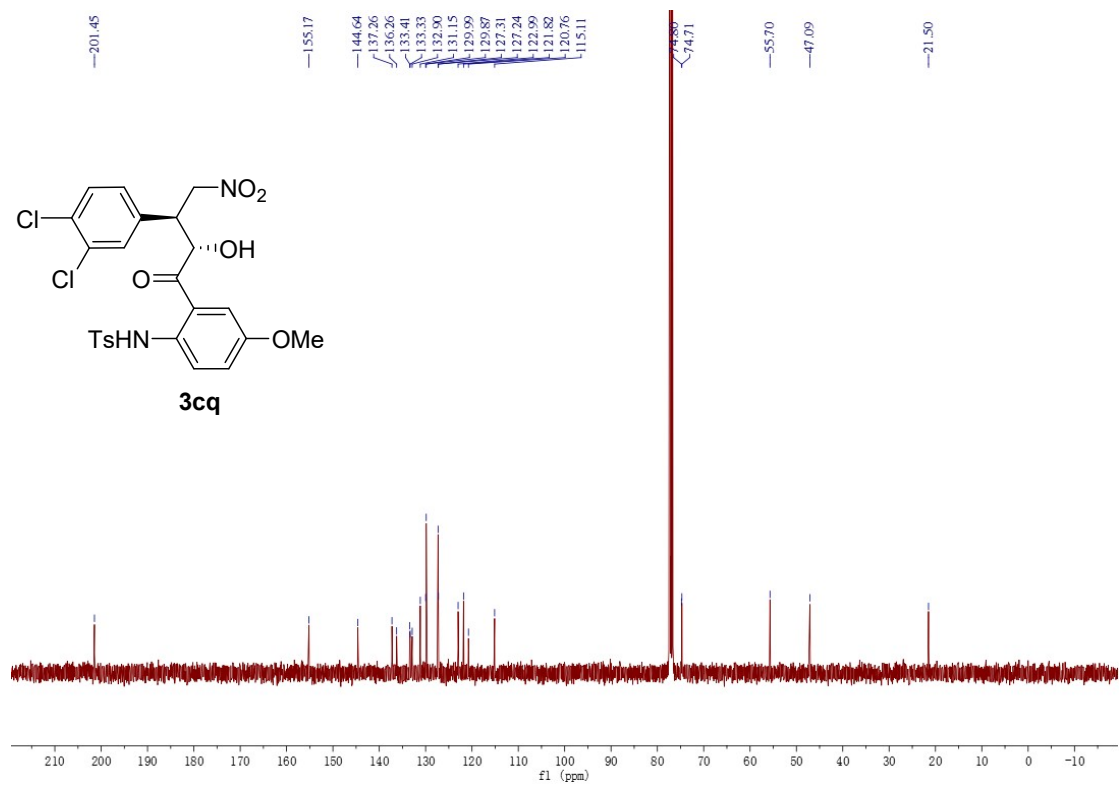

<sup>1</sup>H NMR spectrum of compound **3cr** (CDCl<sub>3</sub>, 400 MHz)

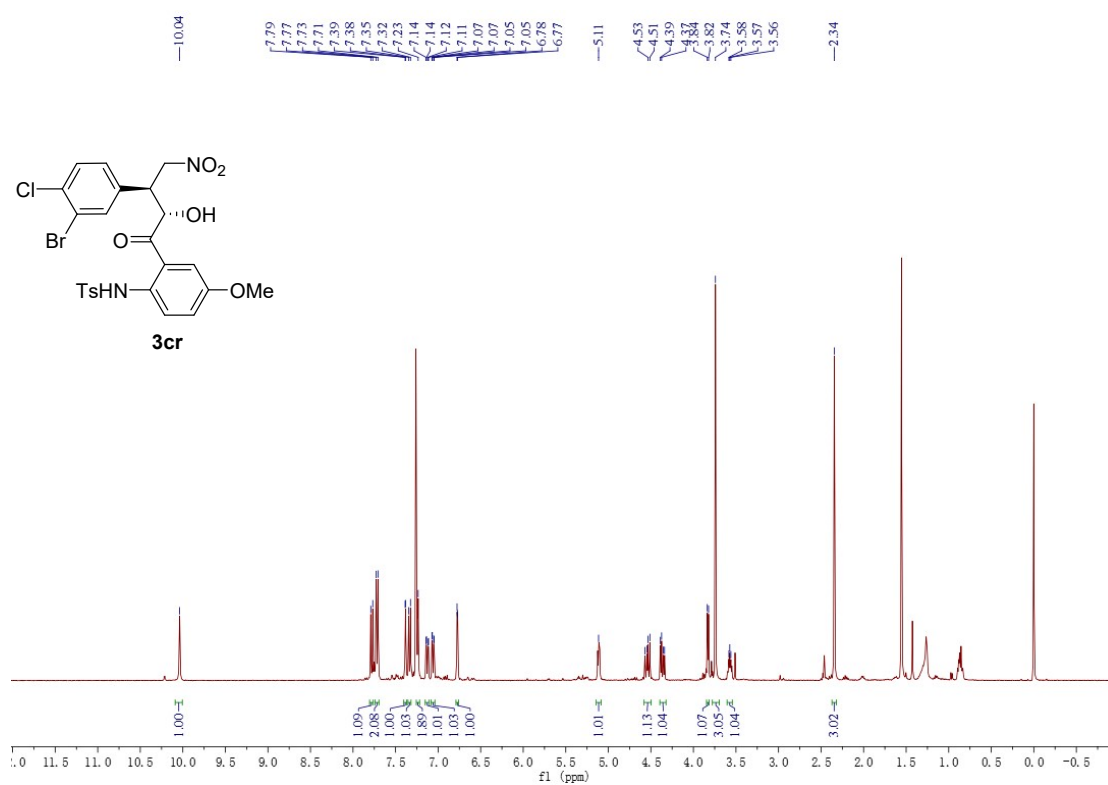

<sup>13</sup>C NMR spectrum of compound **3cr** (CDCl<sub>3</sub>, 400 MHz)

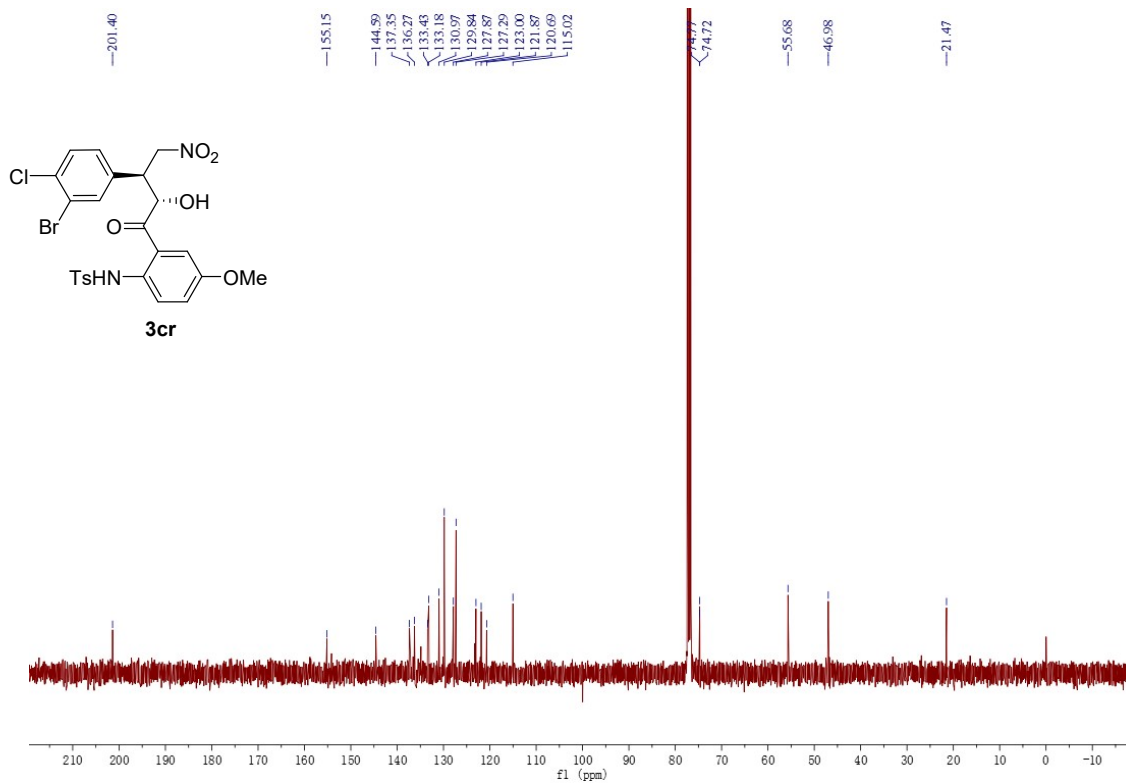

<sup>1</sup>H NMR spectrum of compound **3cs** (CDCl<sub>3</sub>, 400 MHz)

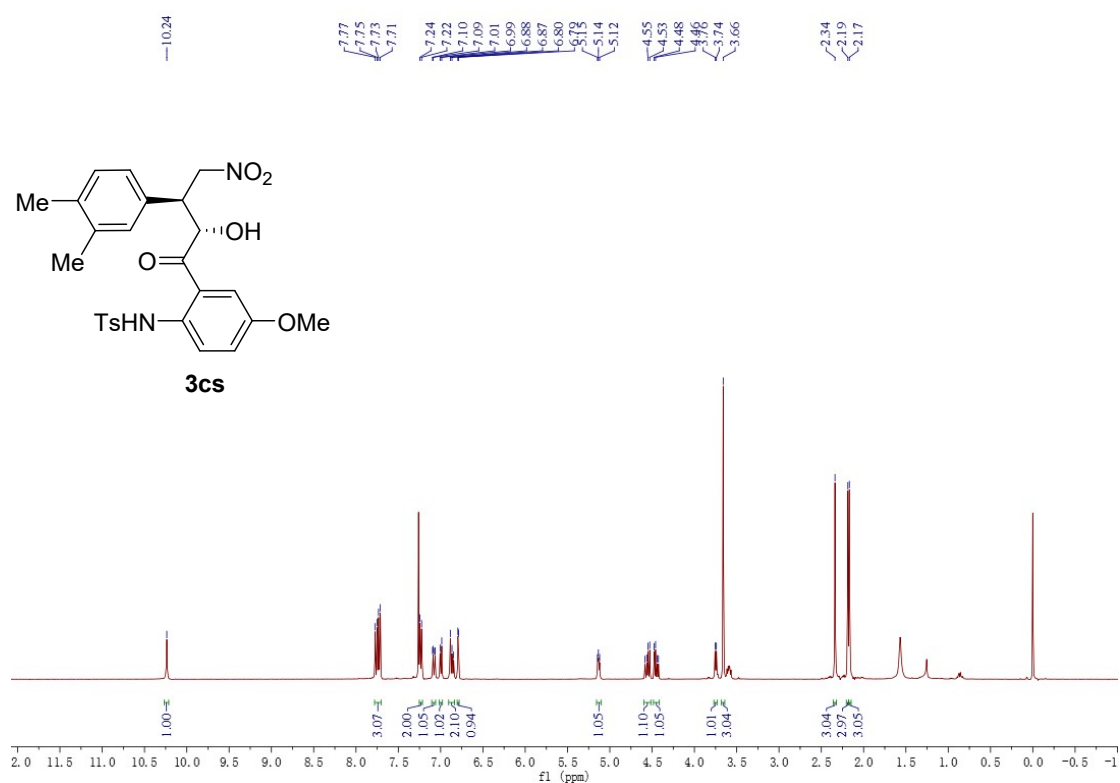

<sup>13</sup>C NMR spectrum of compound **3cs** (CDCl<sub>3</sub>, 400 MHz)

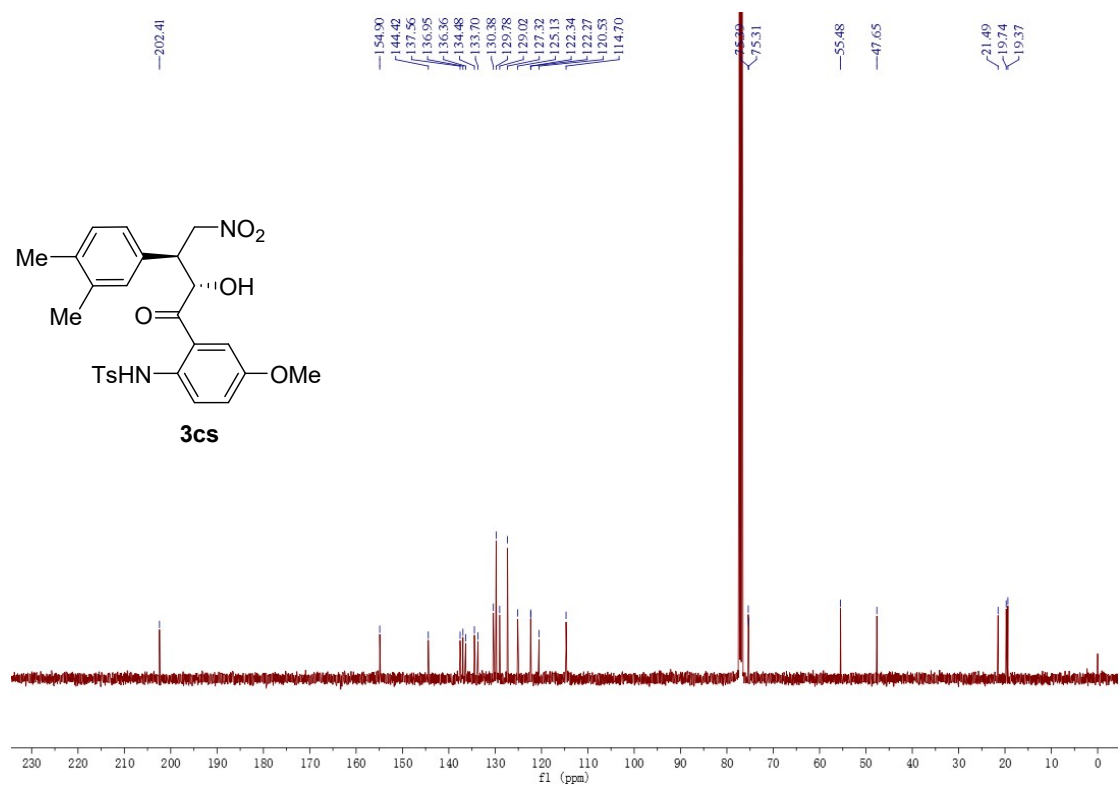

<sup>1</sup>H NMR spectrum of compound **3ct** (CDCl<sub>3</sub>, 400 MHz)

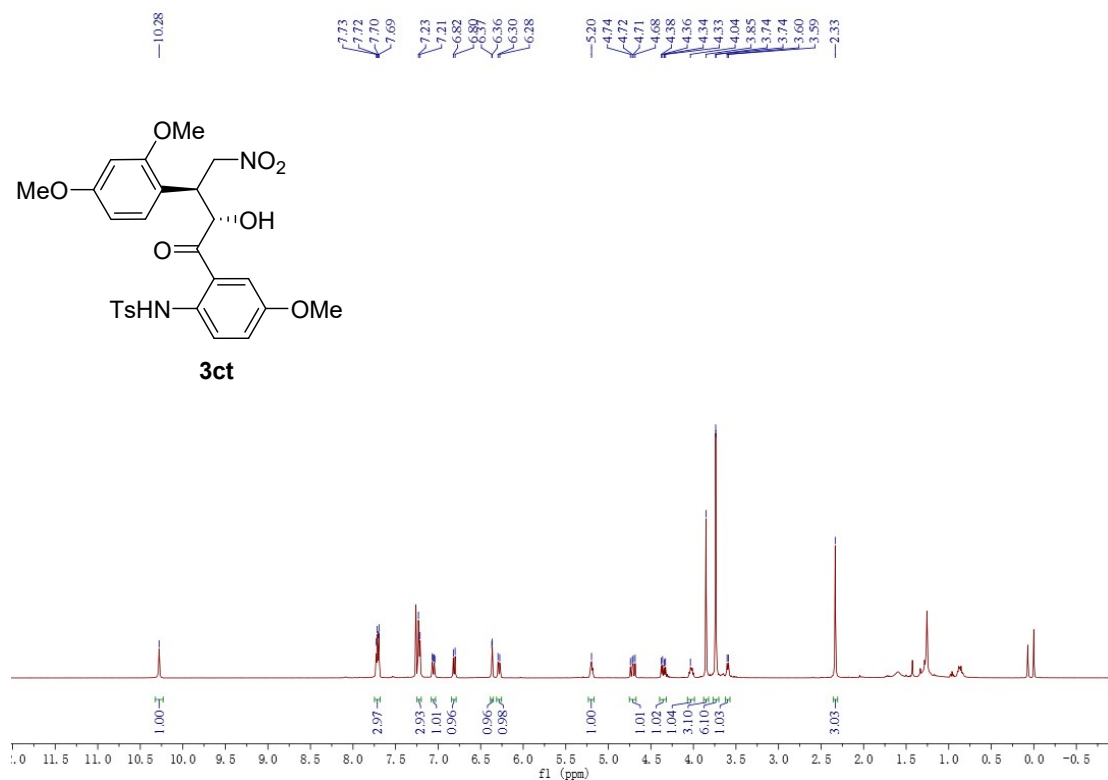

<sup>13</sup>C NMR spectrum of compound **3ct** (CDCl<sub>3</sub>, 400 MHz)

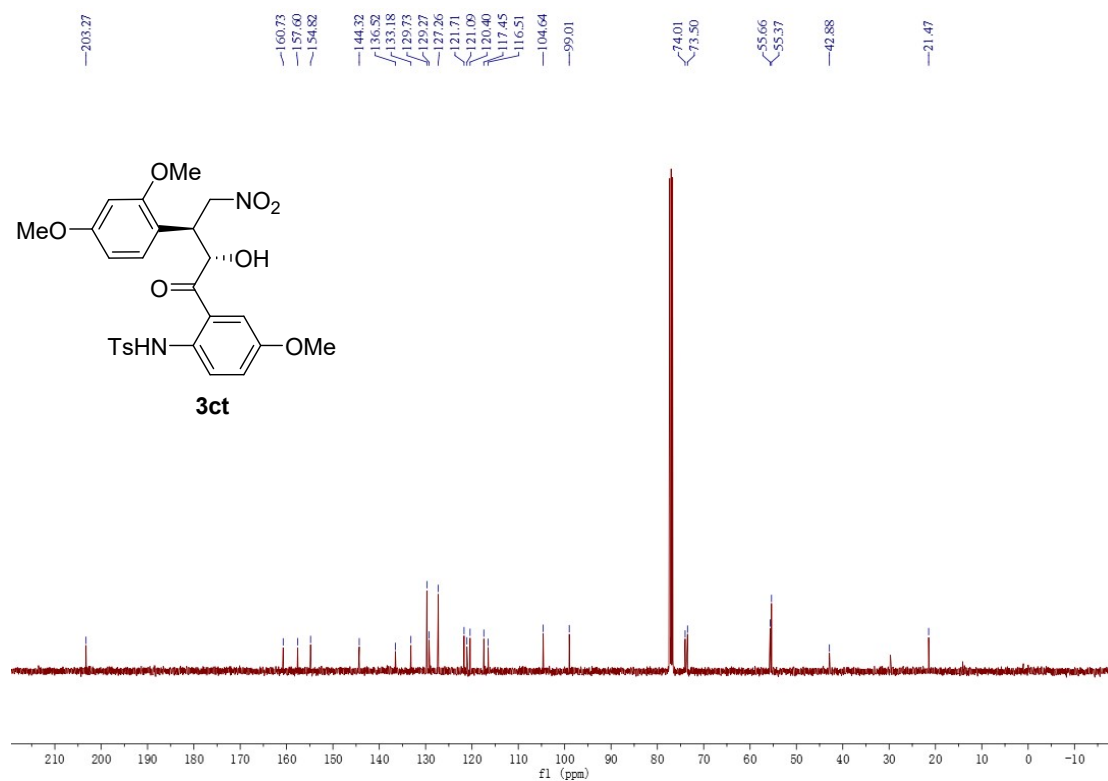

<sup>1</sup>H NMR spectrum of compound **3cu** (CDCl<sub>3</sub>, 400 MHz)

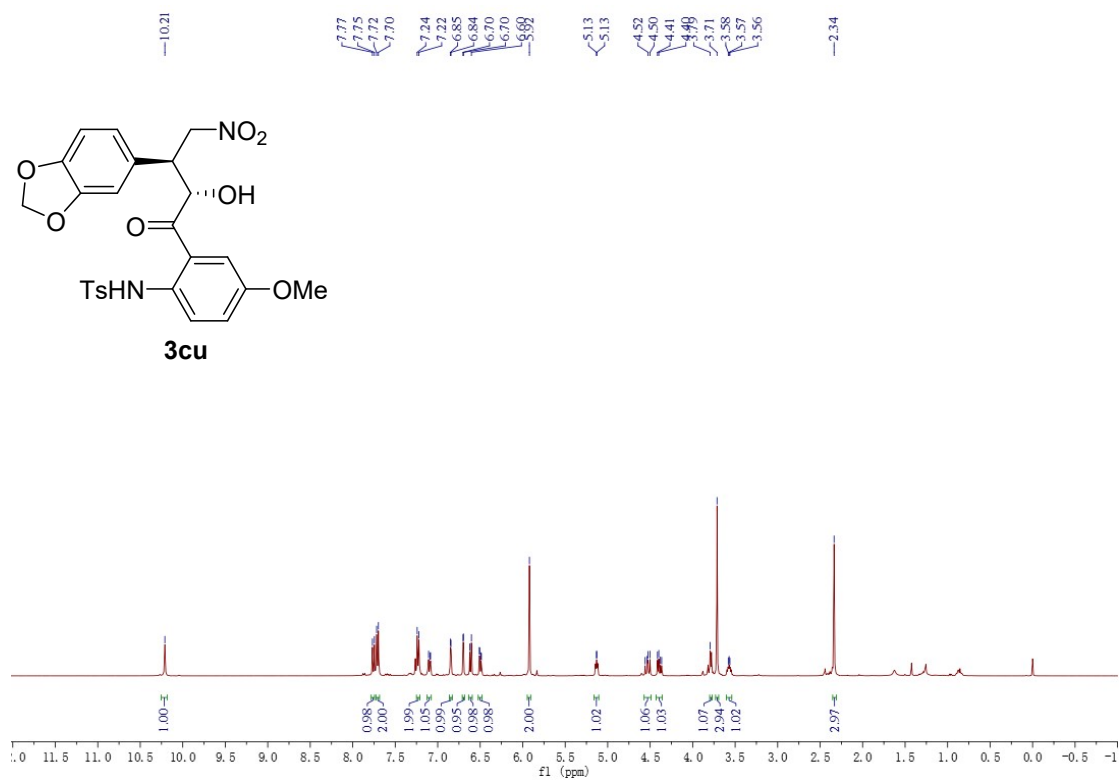

<sup>13</sup>C NMR spectrum of compound **3cu** (CDCl<sub>3</sub>, 400 MHz)

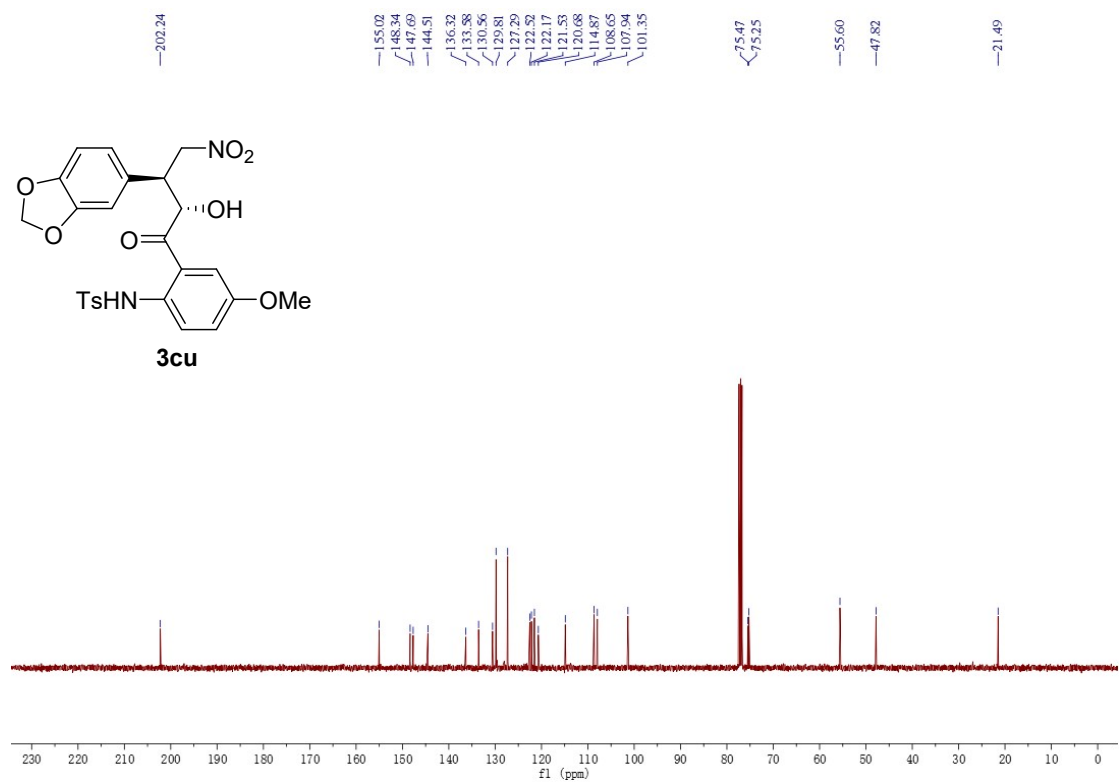



<sup>1</sup>H NMR spectrum of compound **3cv** (CDCl<sub>3</sub>, 400 MHz)

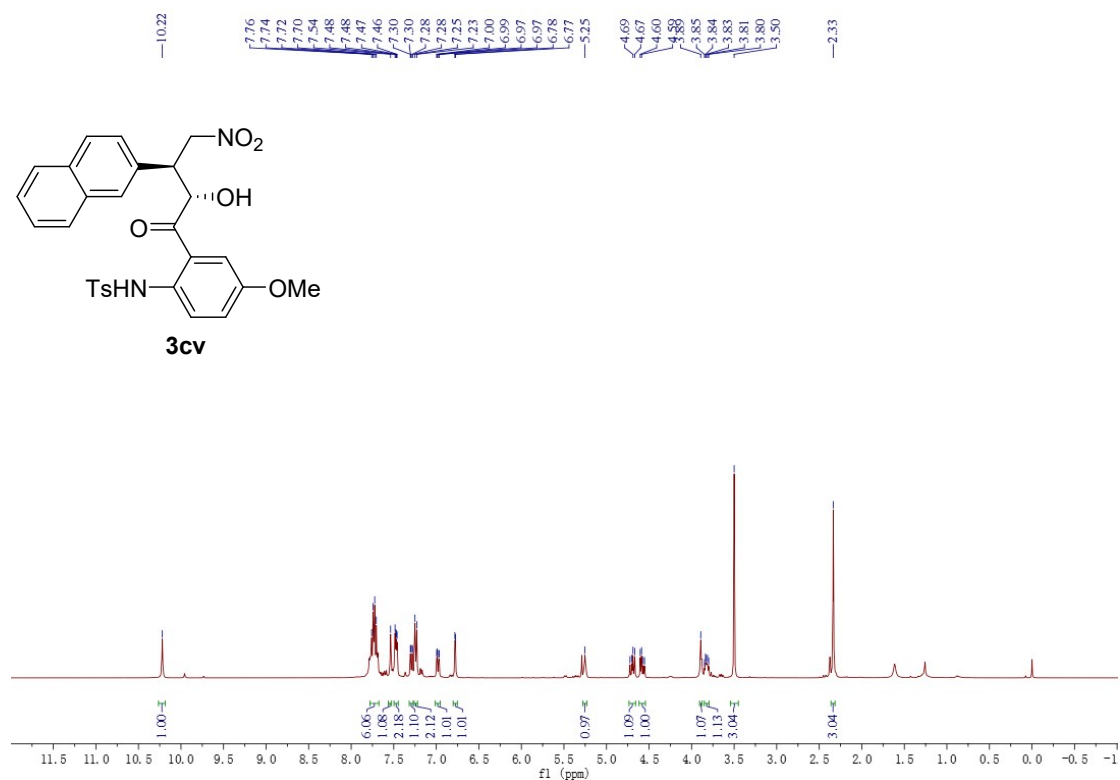

<sup>13</sup>C NMR spectrum of compound **3cv** (CDCl<sub>3</sub>, 400 MHz)

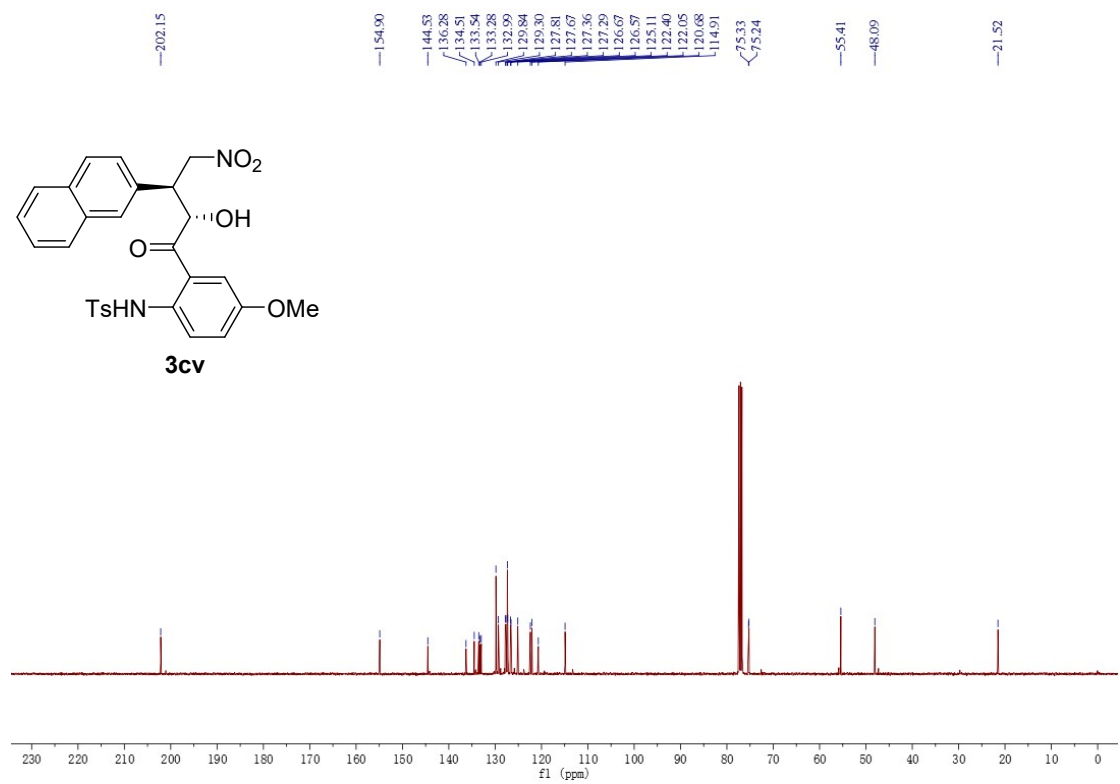

<sup>1</sup>H NMR spectrum of compound **3cw** (CDCl<sub>3</sub>, 400 MHz)

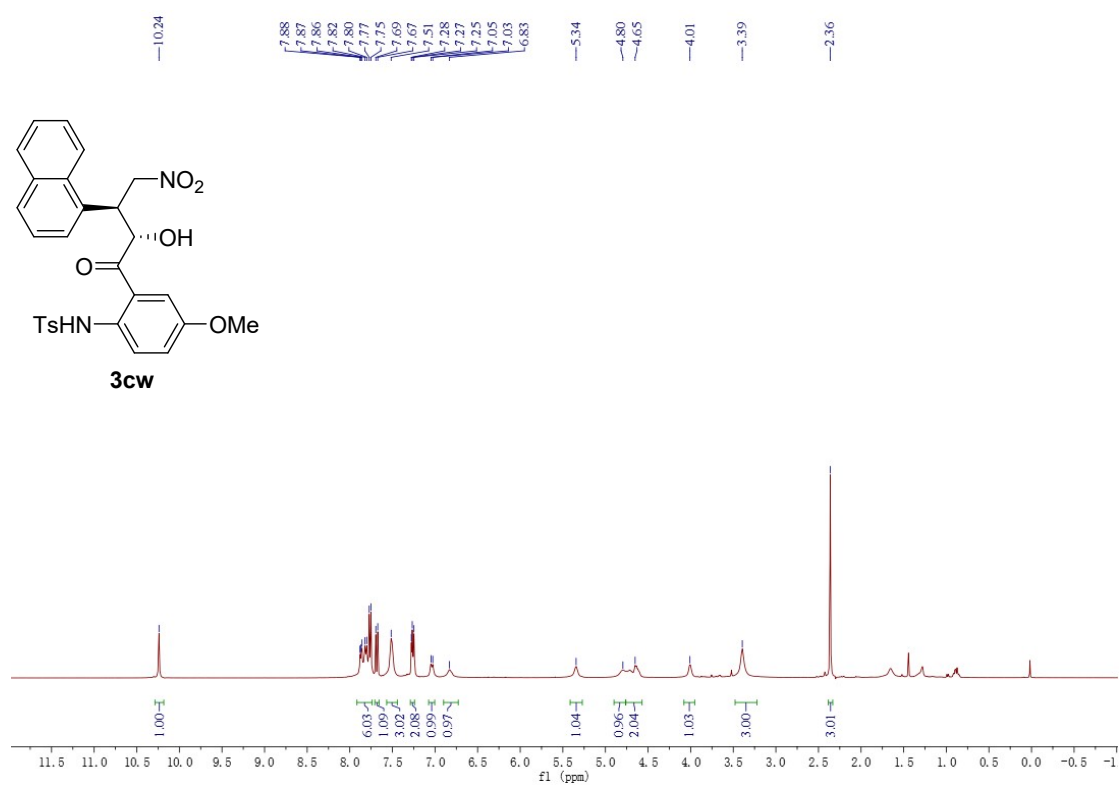

<sup>13</sup>C NMR spectrum of compound **3cw** (CDCl<sub>3</sub>, 400 MHz)

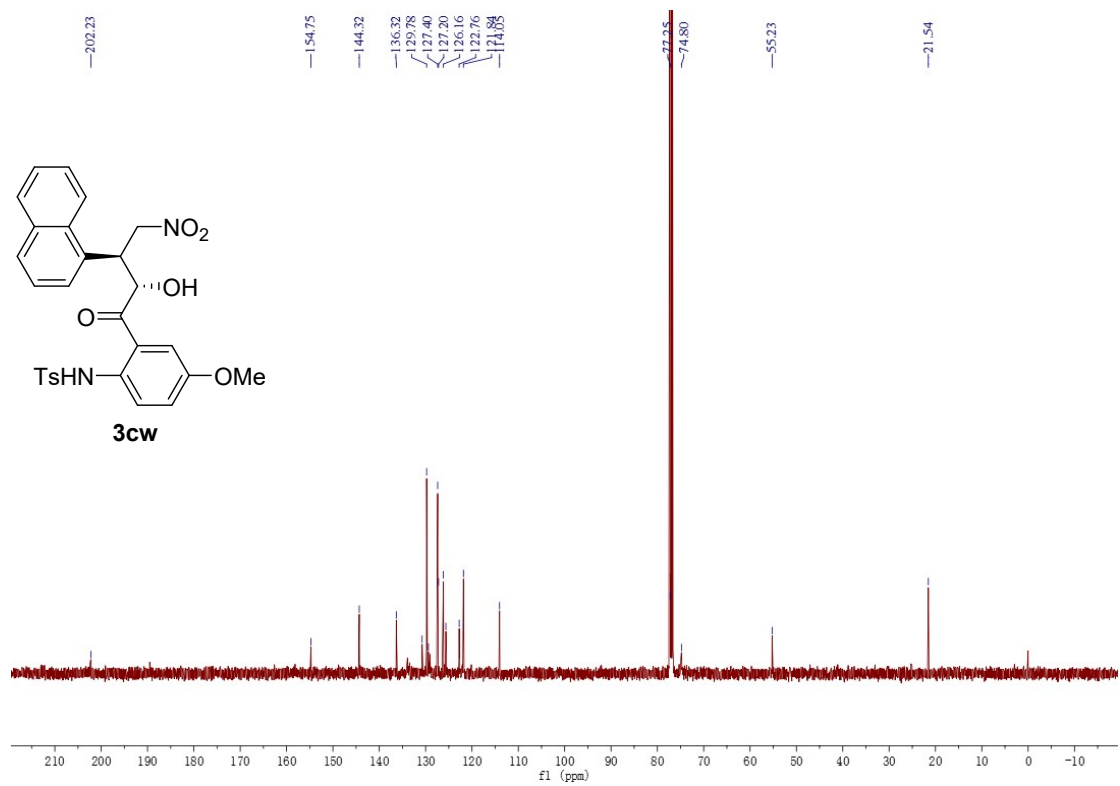

<sup>1</sup>H NMR spectrum of compound **3cx** (CDCl<sub>3</sub>, 400 MHz)

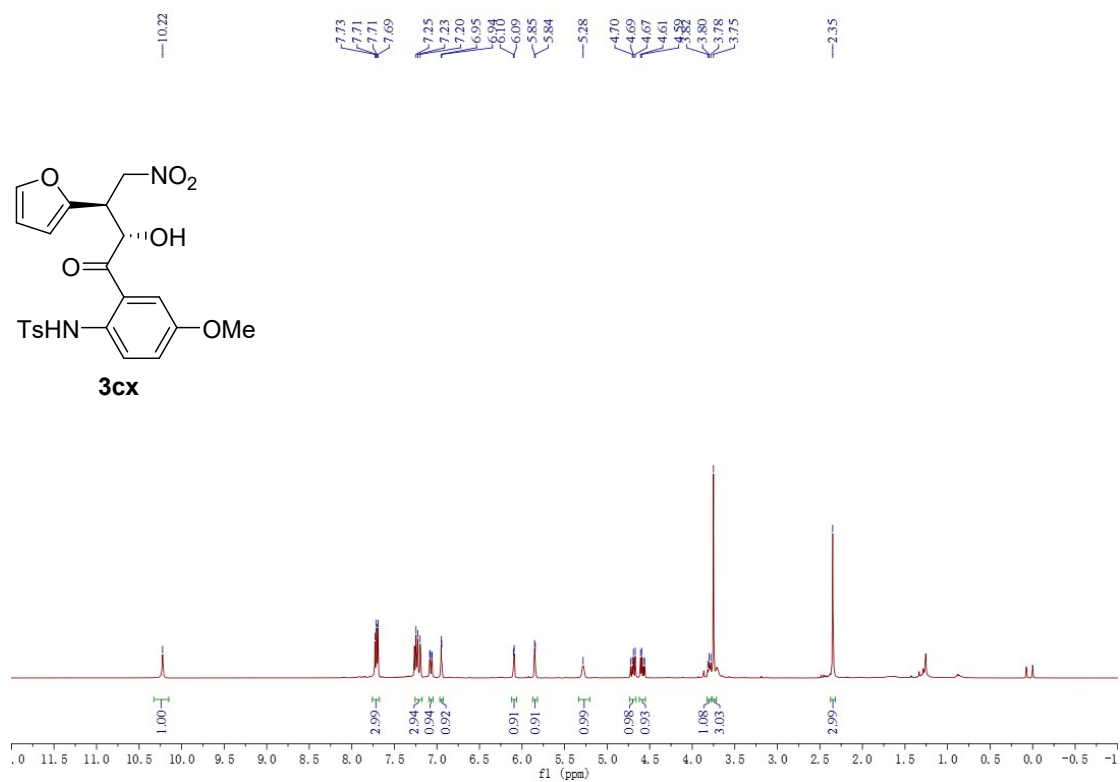

<sup>13</sup>C NMR spectrum of compound **3cx** (CDCl<sub>3</sub>, 400 MHz)

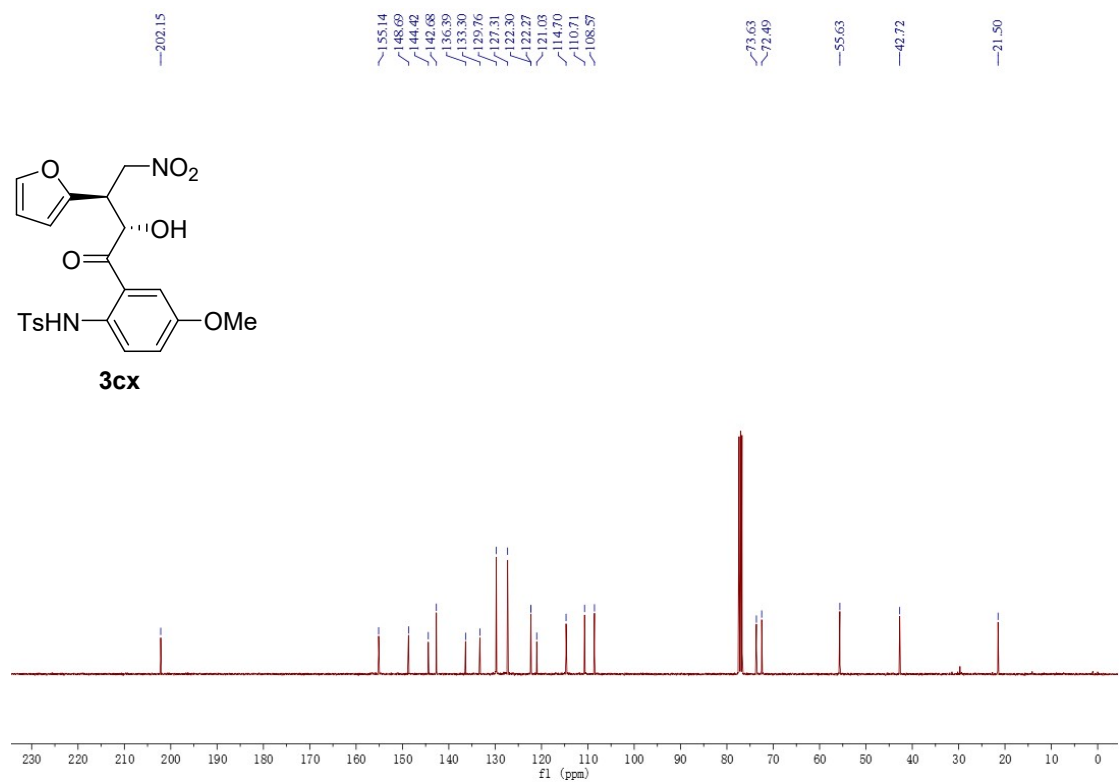

<sup>1</sup>H NMR spectrum of compound **3cy** (CDCl<sub>3</sub>, 400 MHz)

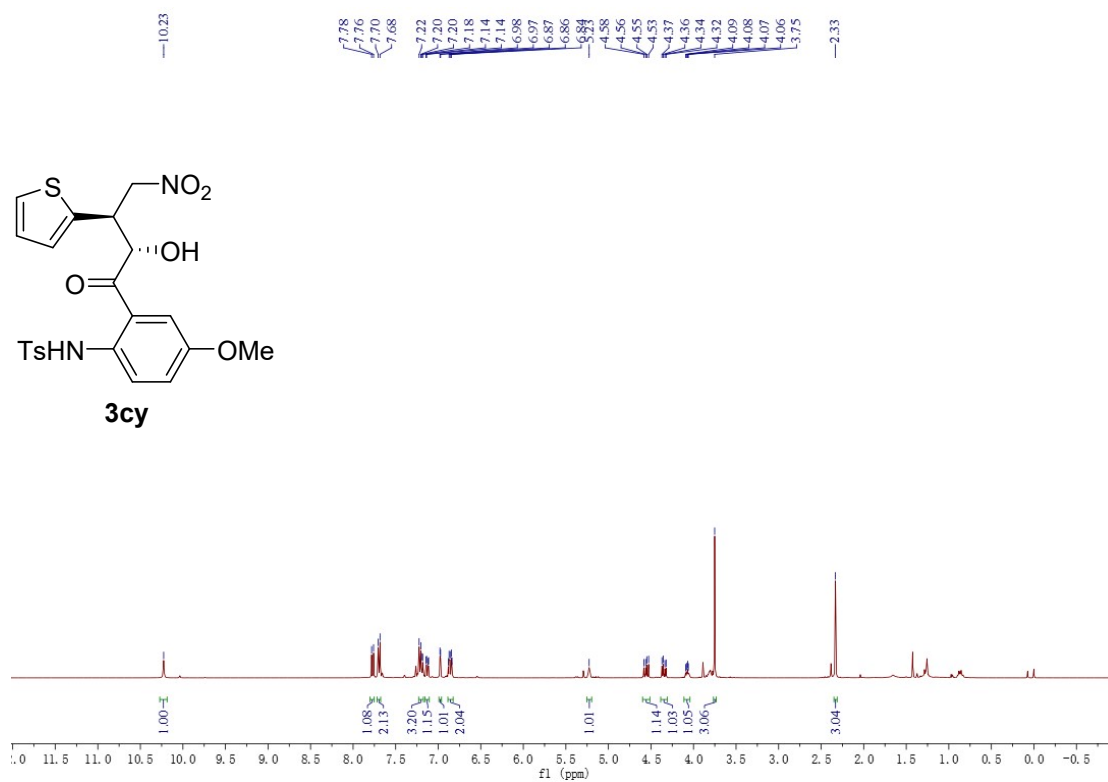

<sup>13</sup>C NMR spectrum of compound **3cy** (CDCl<sub>3</sub>, 400 MHz)

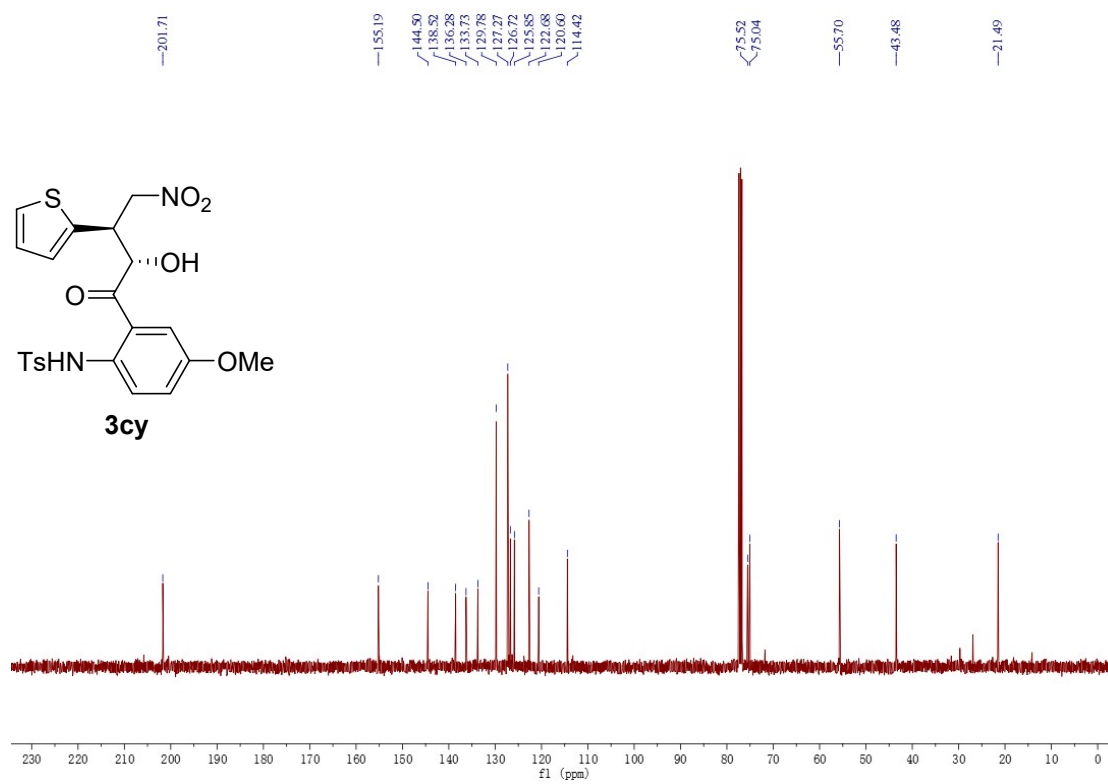

<sup>1</sup>H NMR spectrum of compound **3cz** (CDCl<sub>3</sub>, 400 MHz)

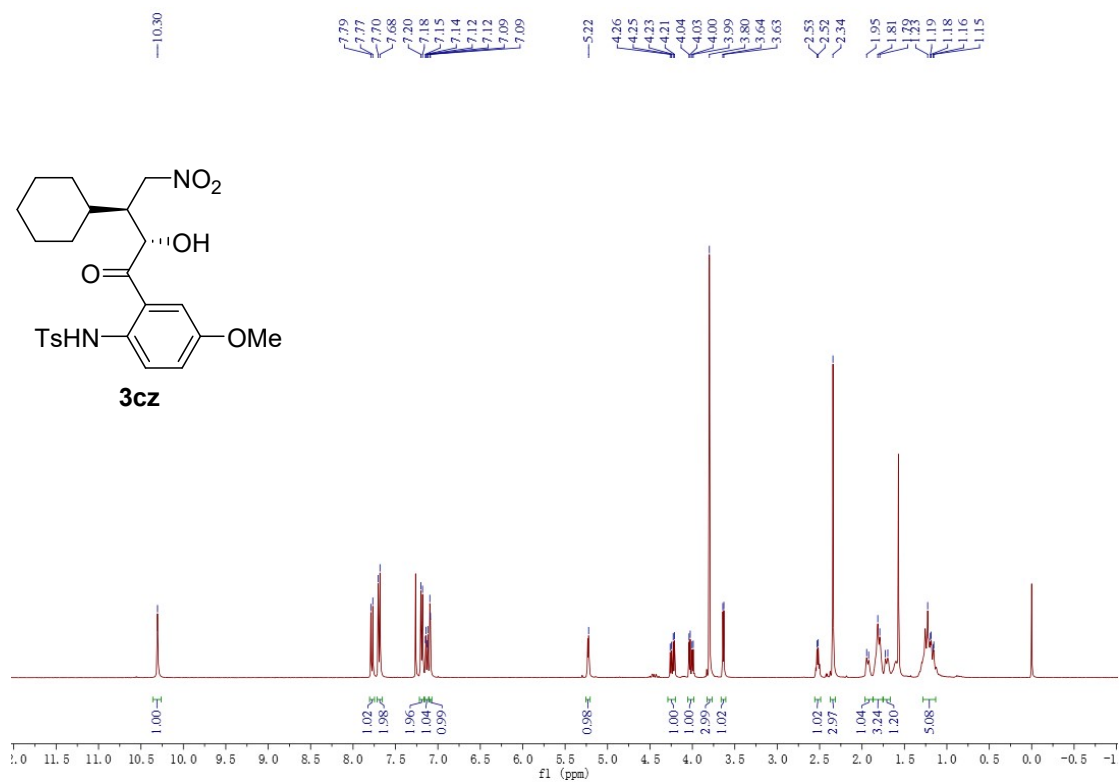

<sup>13</sup>C NMR spectrum of compound **3cz** (CDCl<sub>3</sub>, 400 MHz)

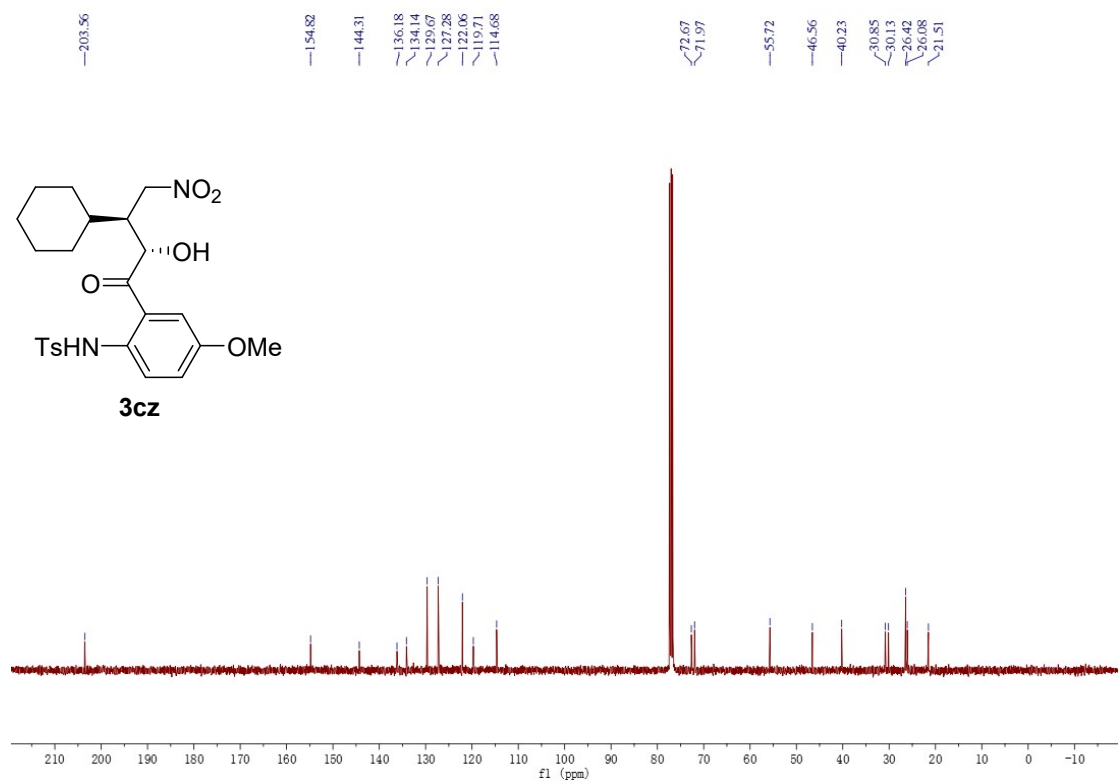

<sup>1</sup>H NMR spectrum of compound **3cza** (CDCl<sub>3</sub>, 400 MHz)

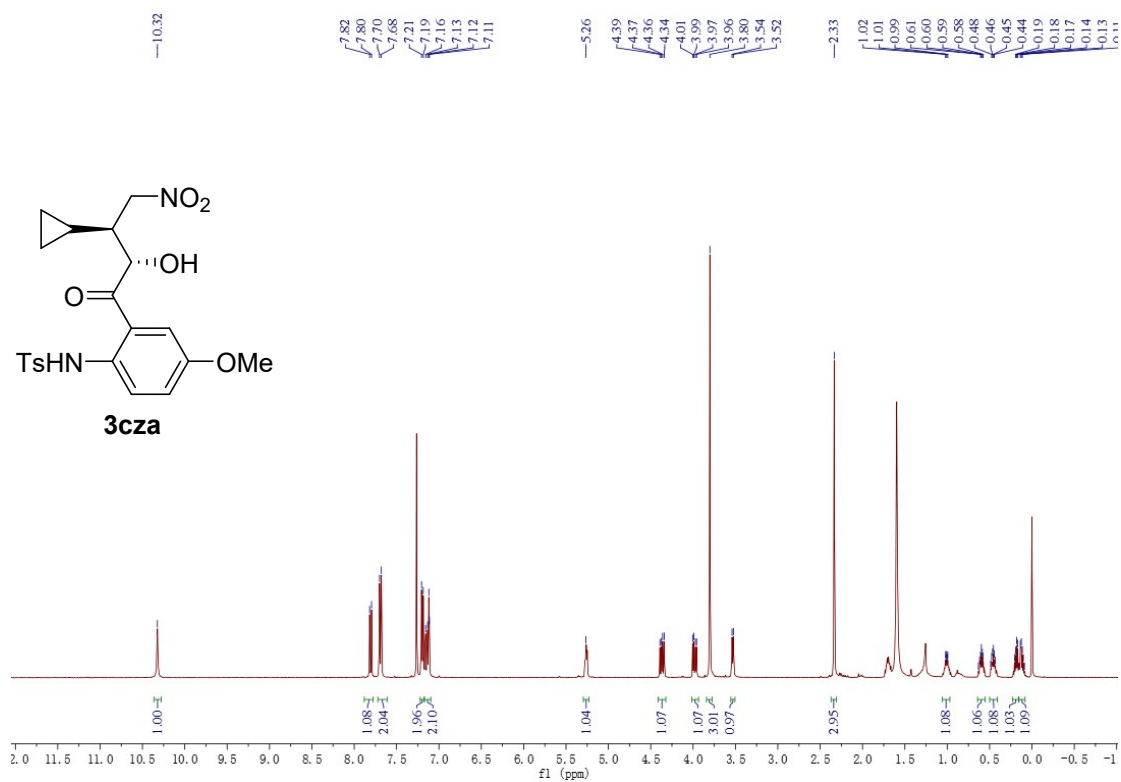

<sup>13</sup>C NMR spectrum of compound **3cza** (CDCl<sub>3</sub>, 400 MHz)

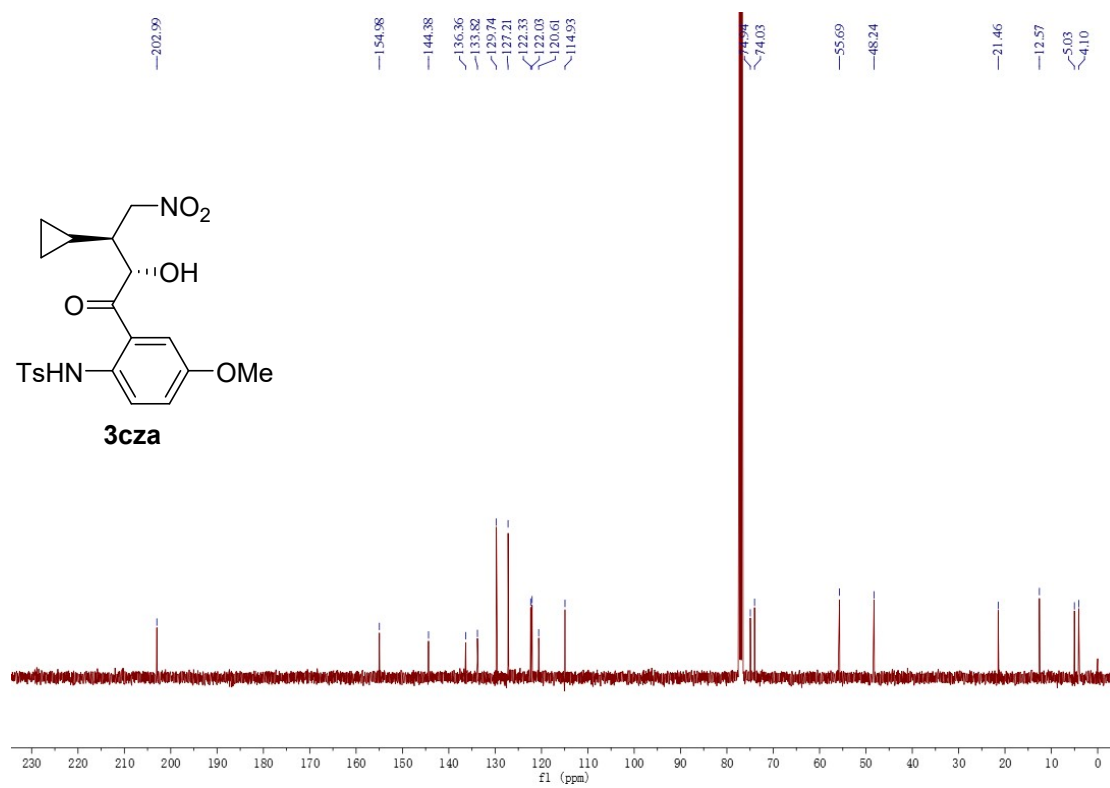

<sup>1</sup>H NMR spectrum of compound **3czb** (CDCl<sub>3</sub>, 400 MHz)

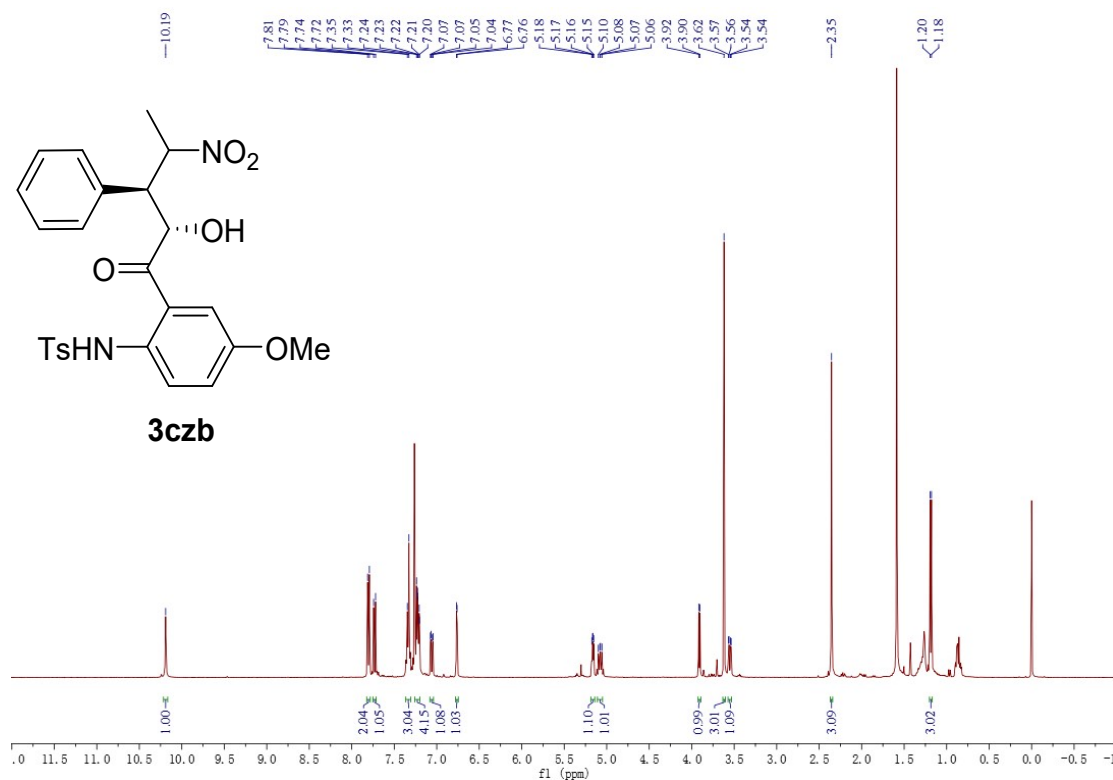

<sup>13</sup>C NMR spectrum of compound **3czb** (CDCl<sub>3</sub>, 400 MHz)

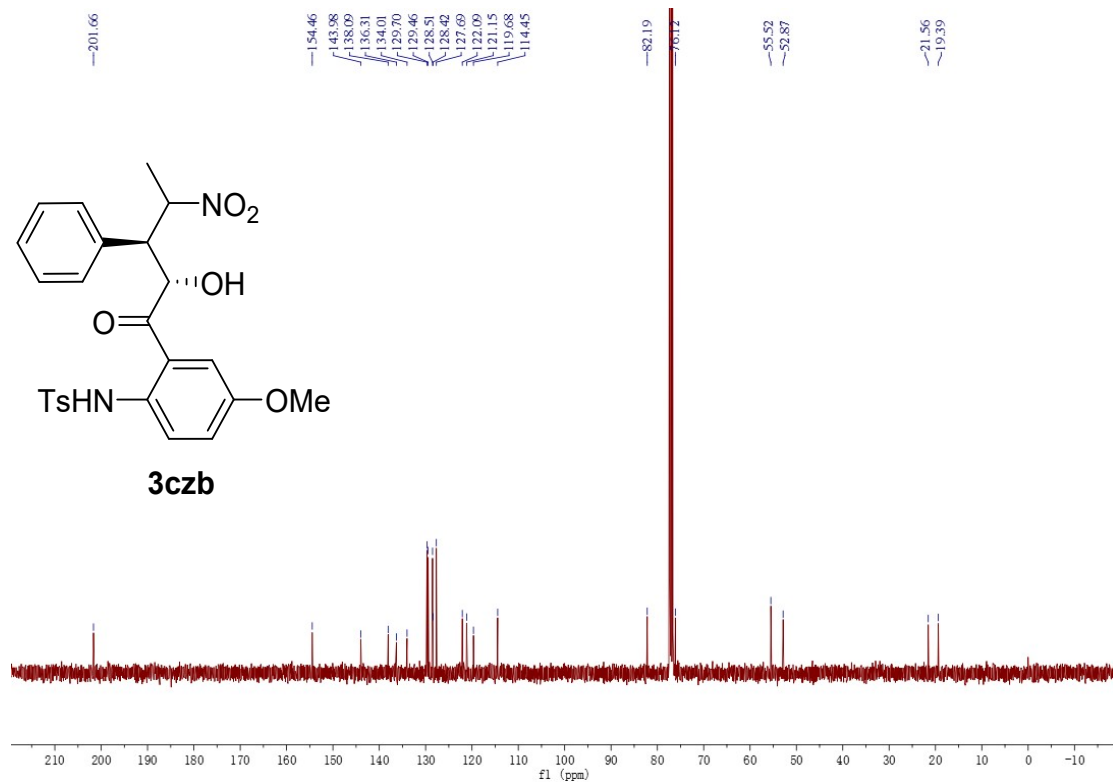

<sup>1</sup>H NMR spectrum of compound **4a** (CDCl<sub>3</sub>, 400 MHz)

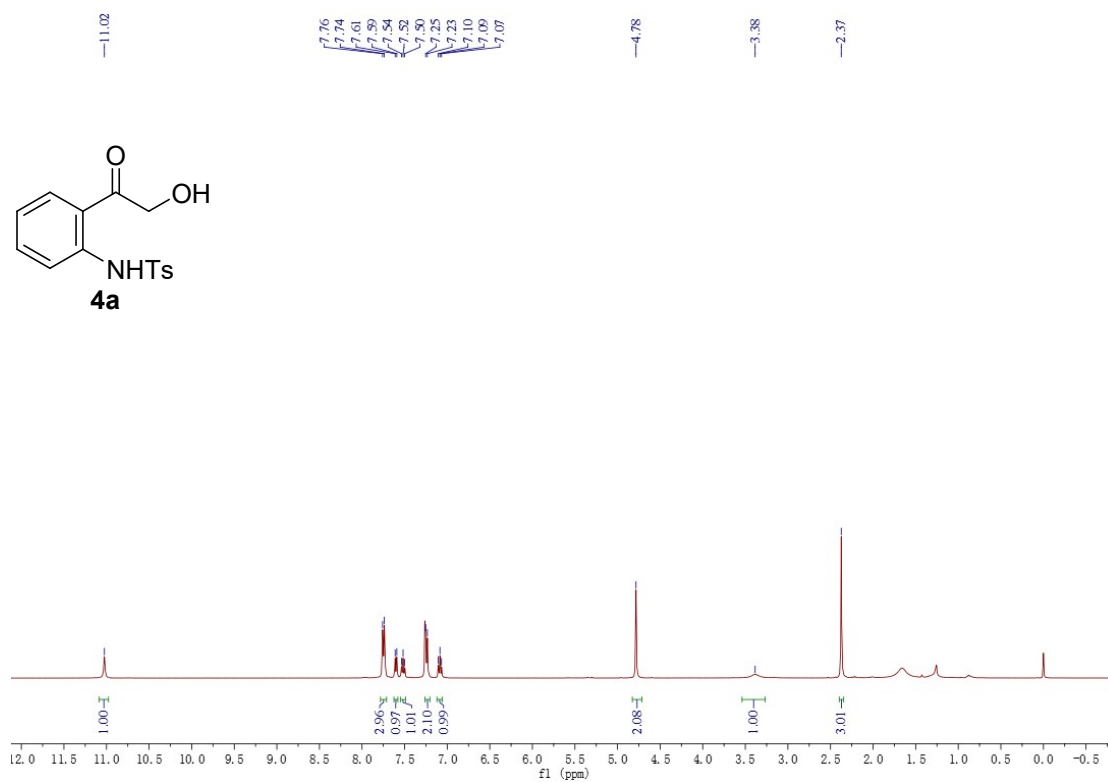

<sup>13</sup>C NMR spectrum of compound **4a** (CDCl<sub>3</sub>, 400 MHz)

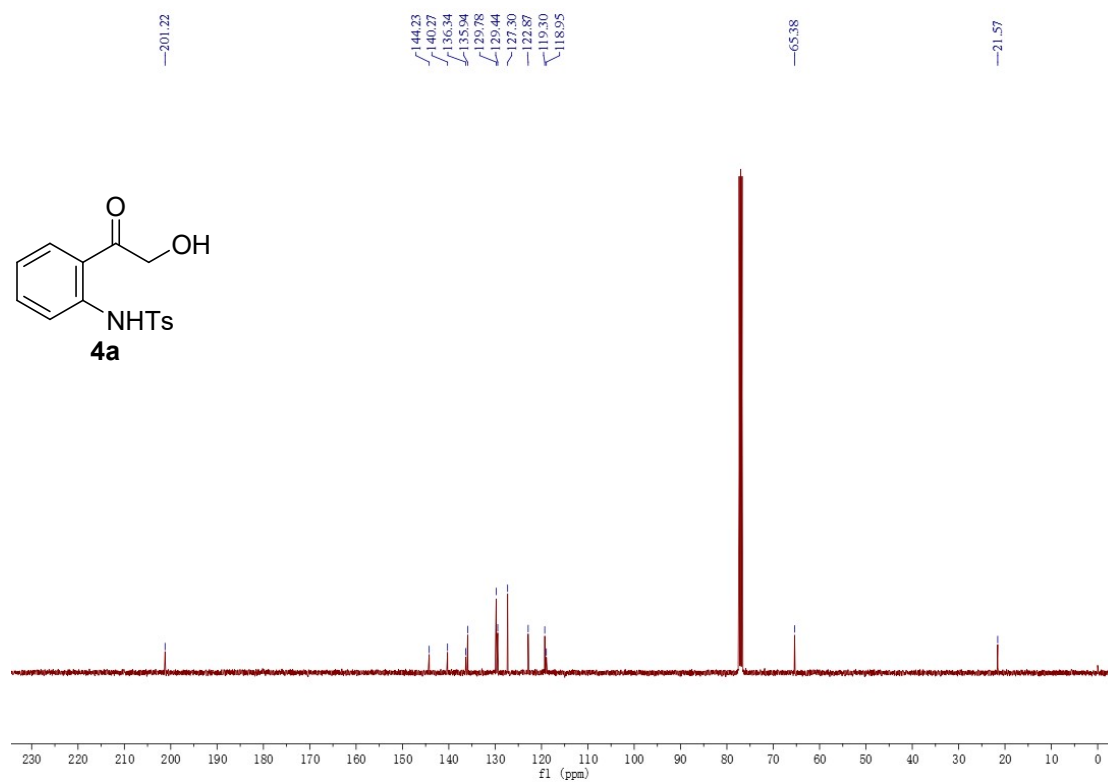



<sup>1</sup>H NMR spectrum of compound **4b** (CDCl<sub>3</sub>, 400 MHz)

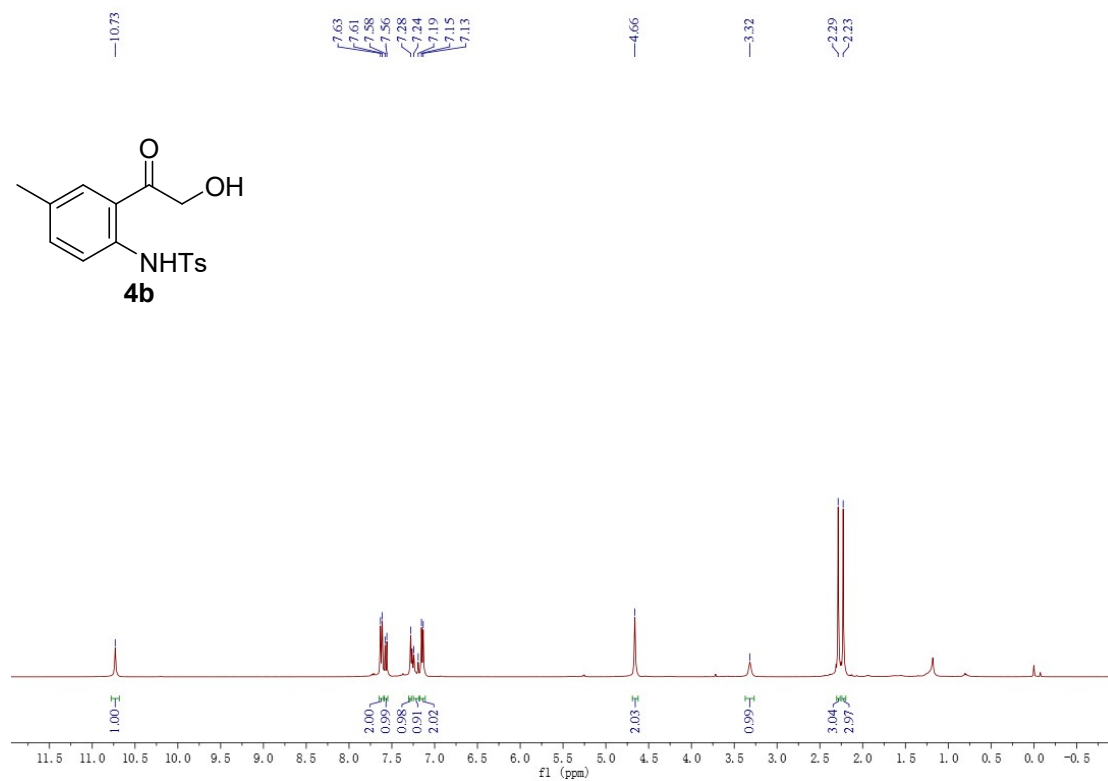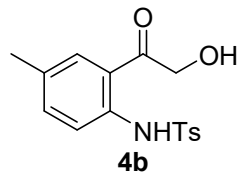

<sup>13</sup>C NMR spectrum of compound **4b** (CDCl<sub>3</sub>, 400 MHz)

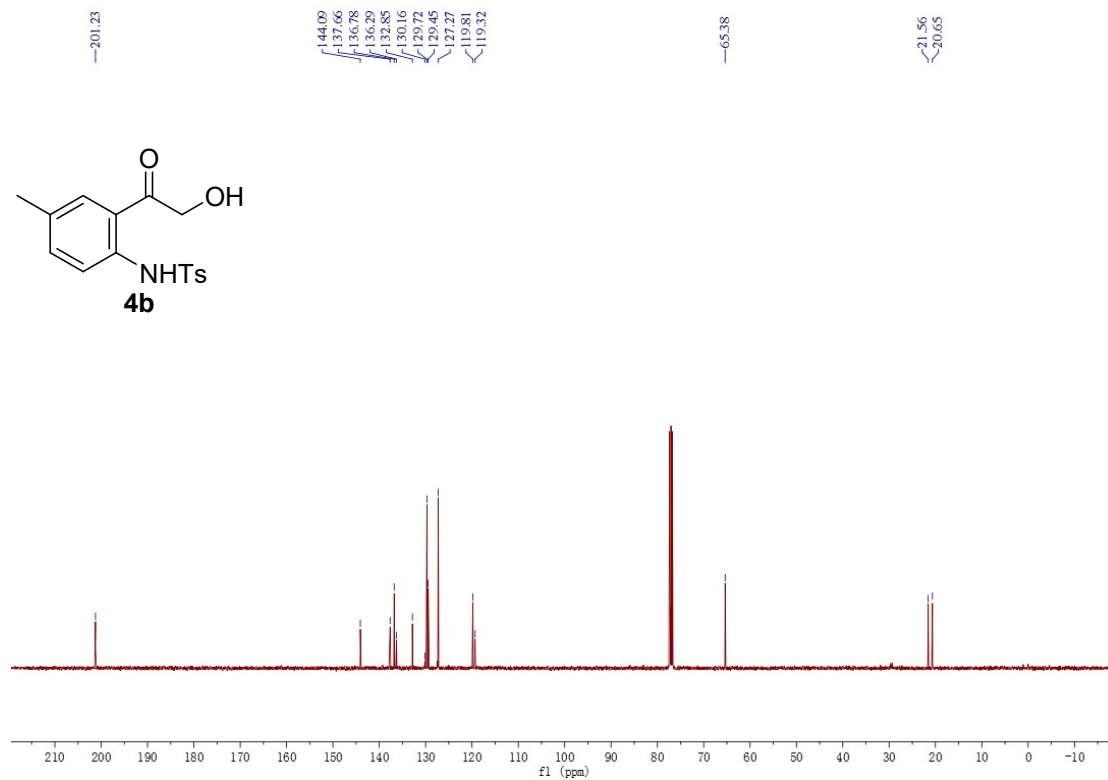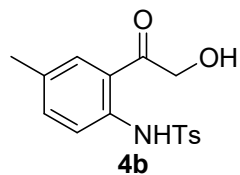

<sup>1</sup>H NMR spectrum of compound **4c** (CDCl<sub>3</sub>, 400 MHz)

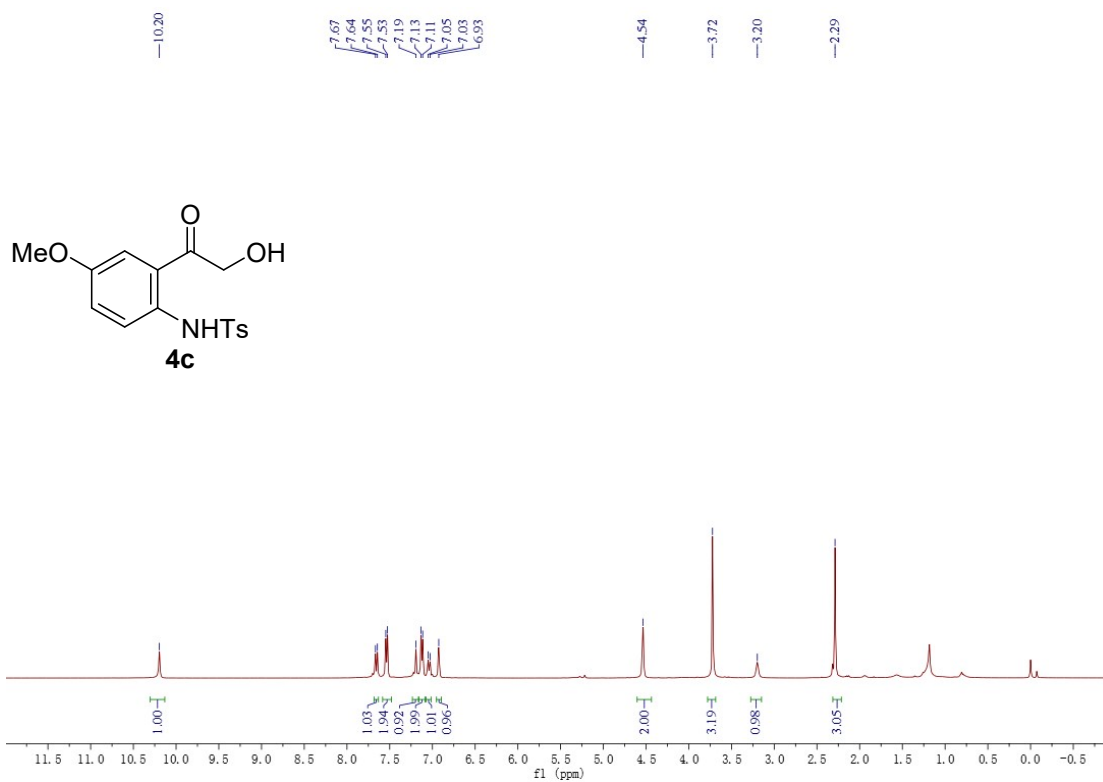

<sup>13</sup>C NMR spectrum of compound **4c** (CDCl<sub>3</sub>, 400 MHz)

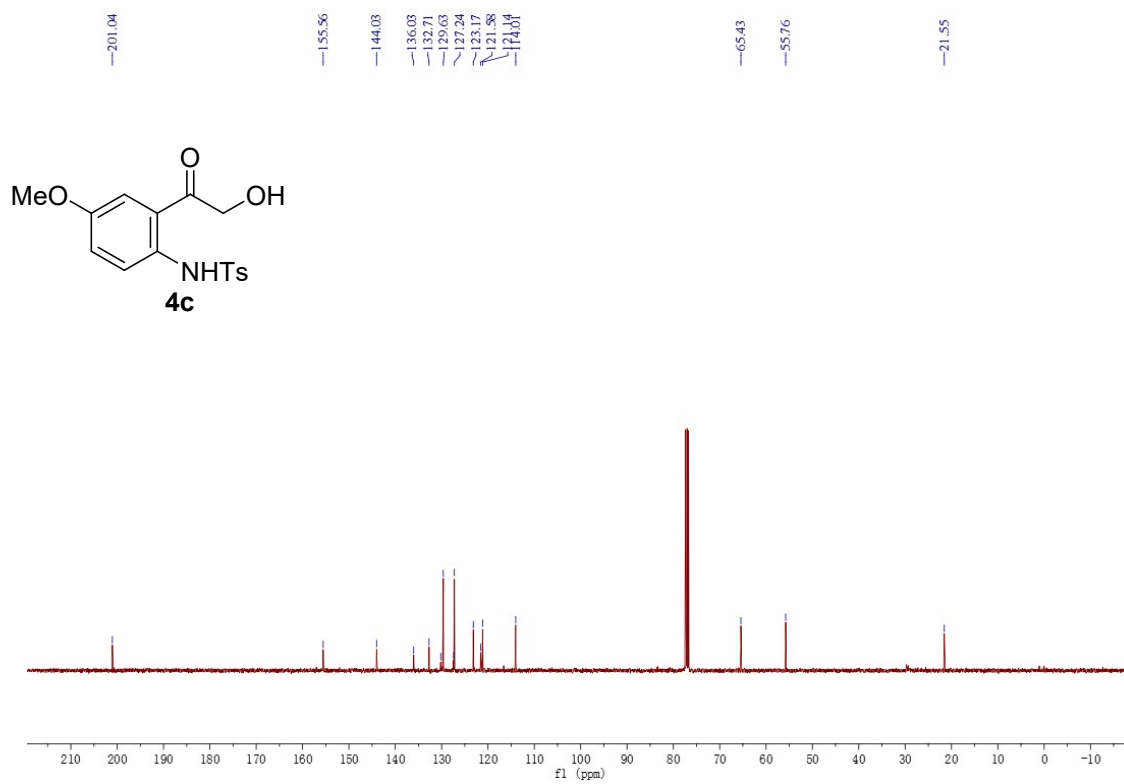

<sup>1</sup>H NMR spectrum of compound **4d** (CDCl<sub>3</sub>, 400 MHz)

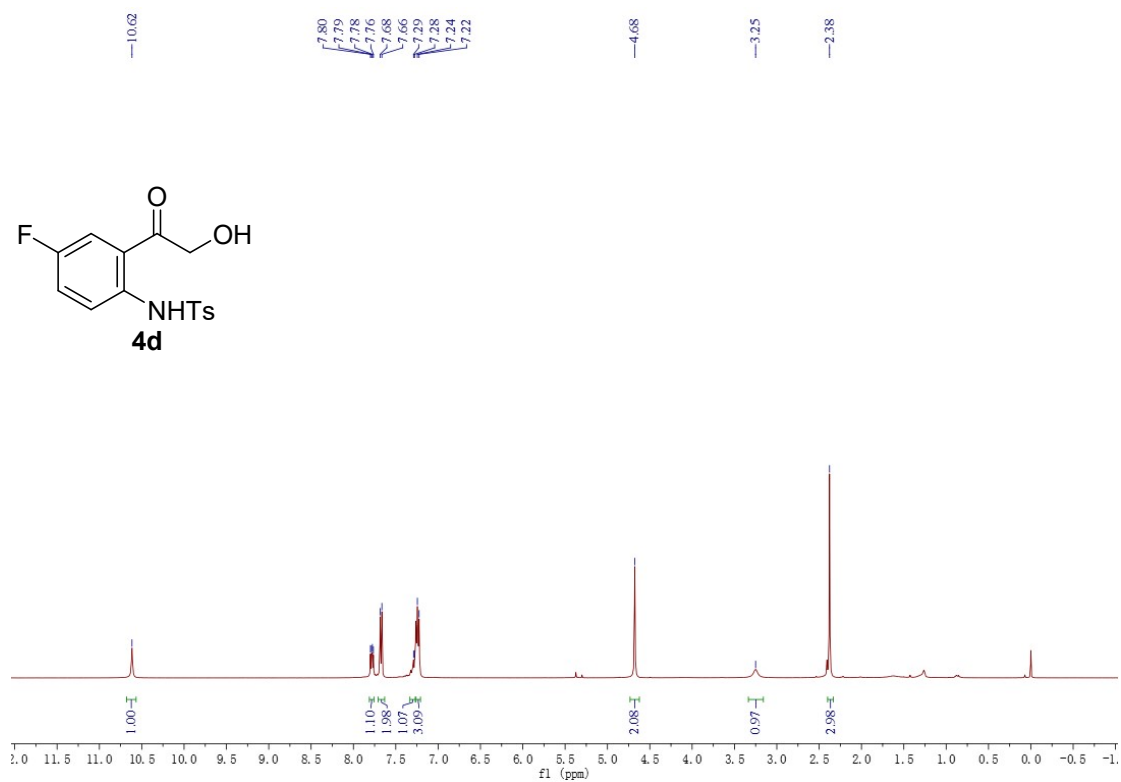

<sup>13</sup>C NMR spectrum of compound **4d** (CDCl<sub>3</sub>, 400 MHz)

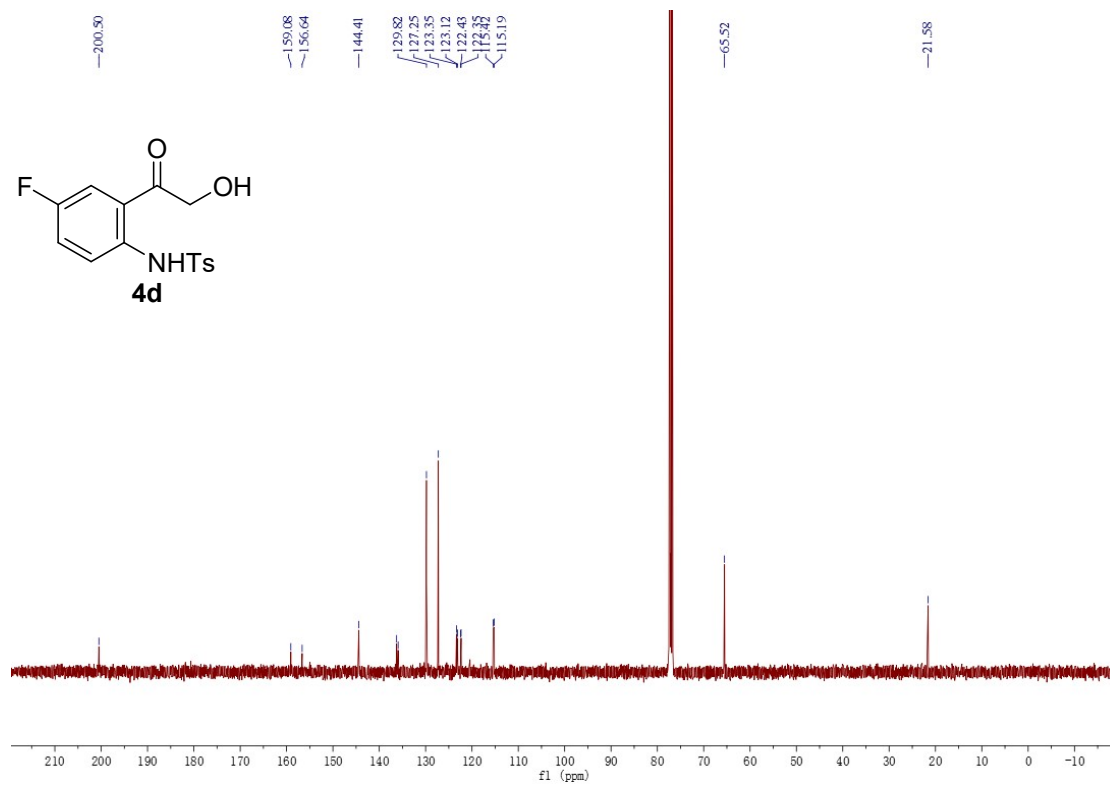

$^{19}\text{F}$  NMR spectrum of compound **4d** ( $\text{CDCl}_3$ , 400 MHz)

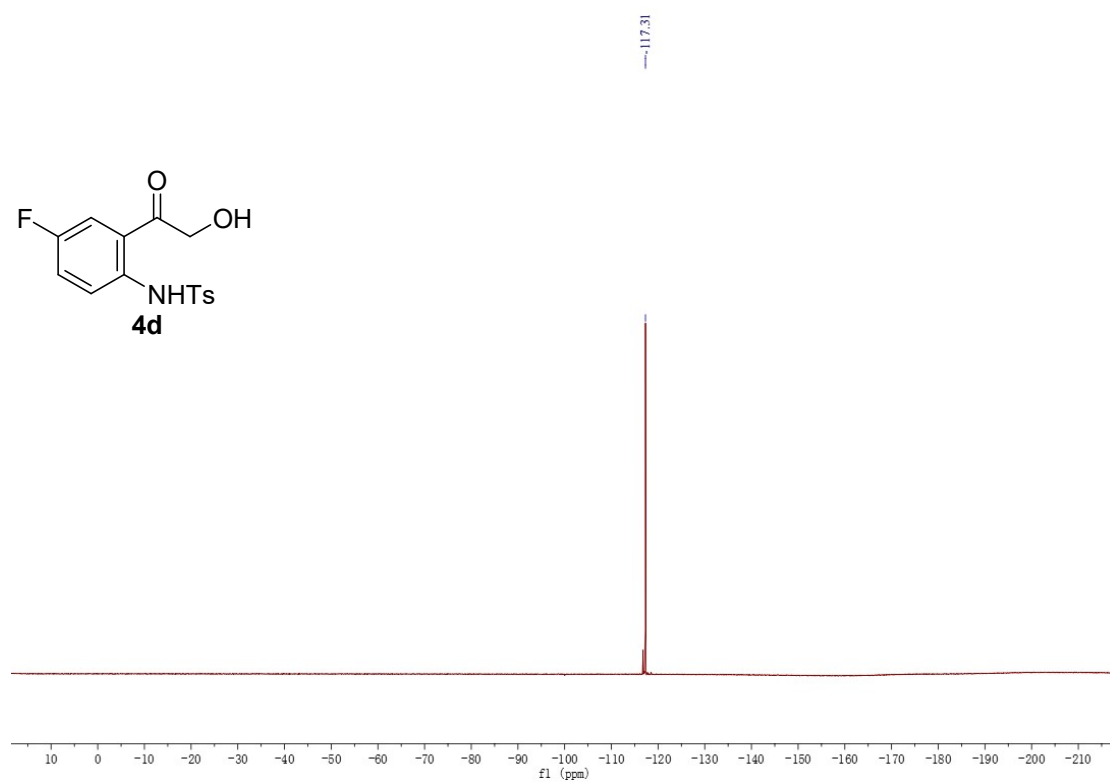

<sup>1</sup>H NMR spectrum of compound **4e** (CDCl<sub>3</sub>, 400 MHz)

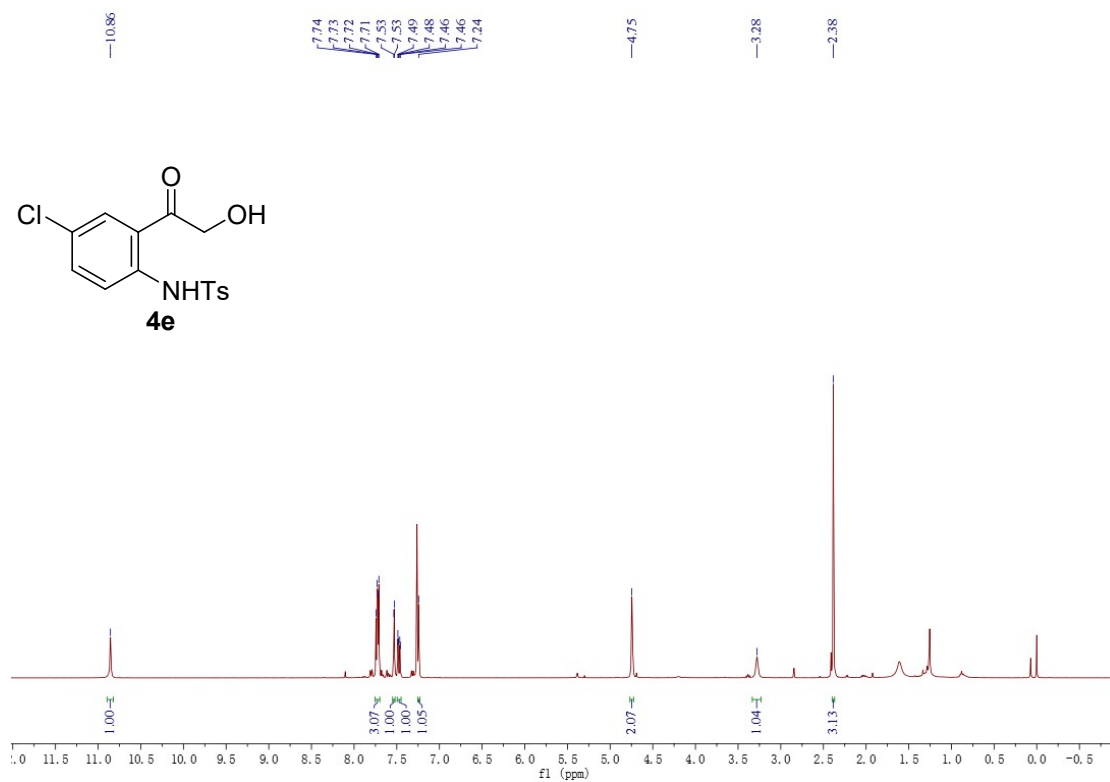

<sup>13</sup>C NMR spectrum of compound **4e** (CDCl<sub>3</sub>, 400 MHz)

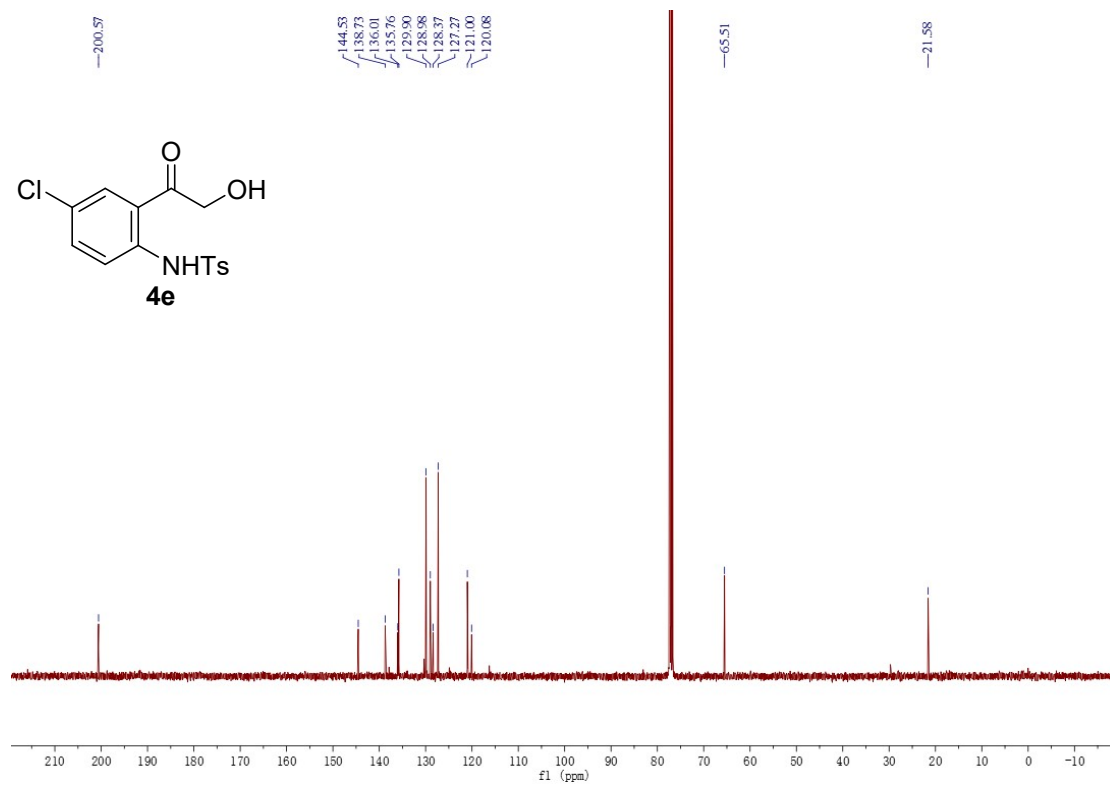

<sup>1</sup>H NMR spectrum of compound **4f** (CDCl<sub>3</sub>, 400 MHz)

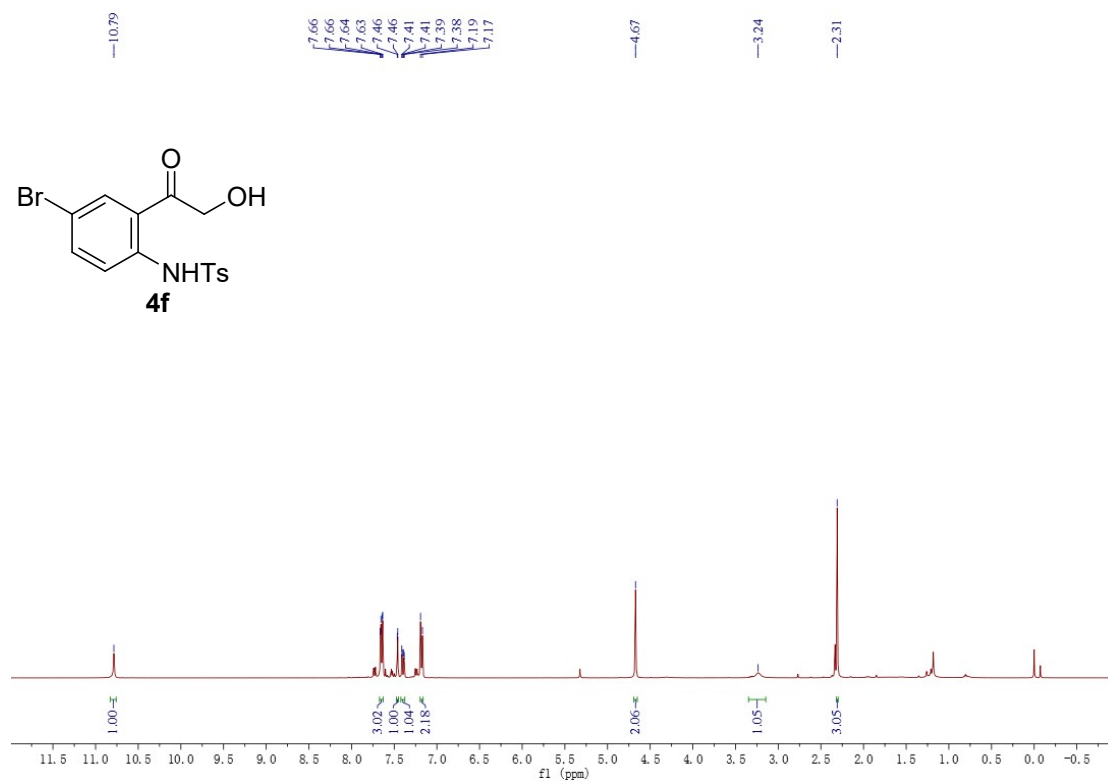

<sup>13</sup>C NMR spectrum of compound **4f** (CDCl<sub>3</sub>, 400 MHz)

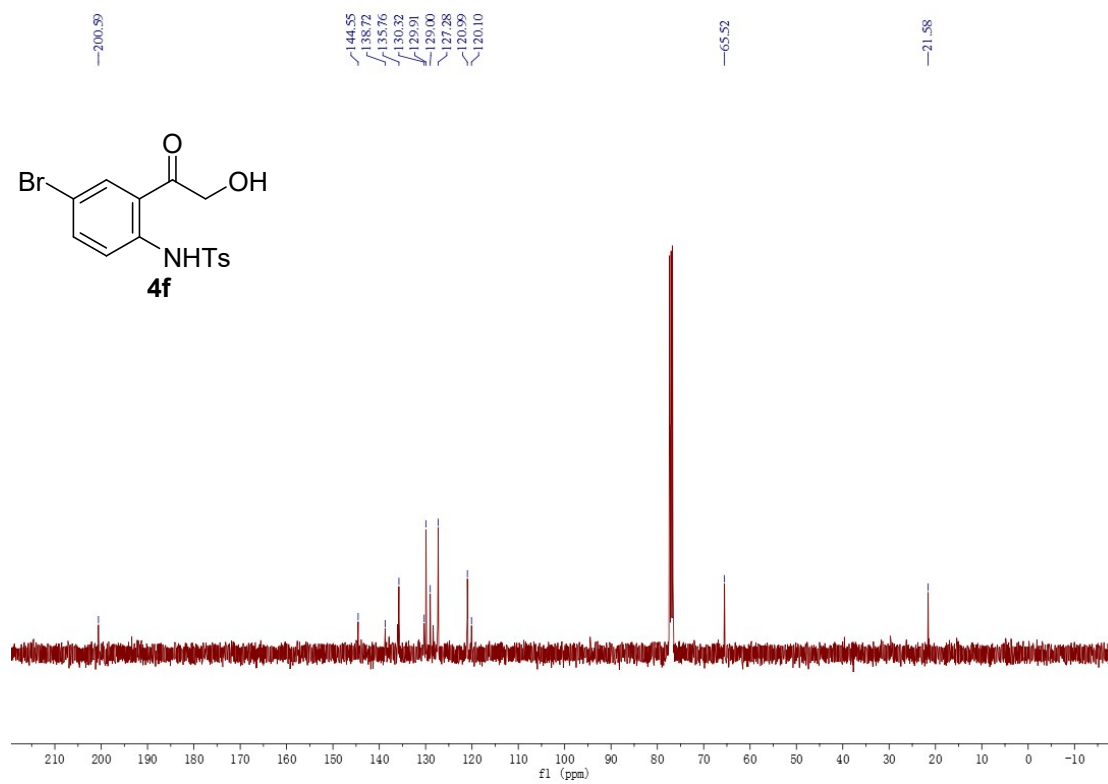

<sup>1</sup>H NMR spectrum of compound **4g** (CDCl<sub>3</sub>, 400 MHz)

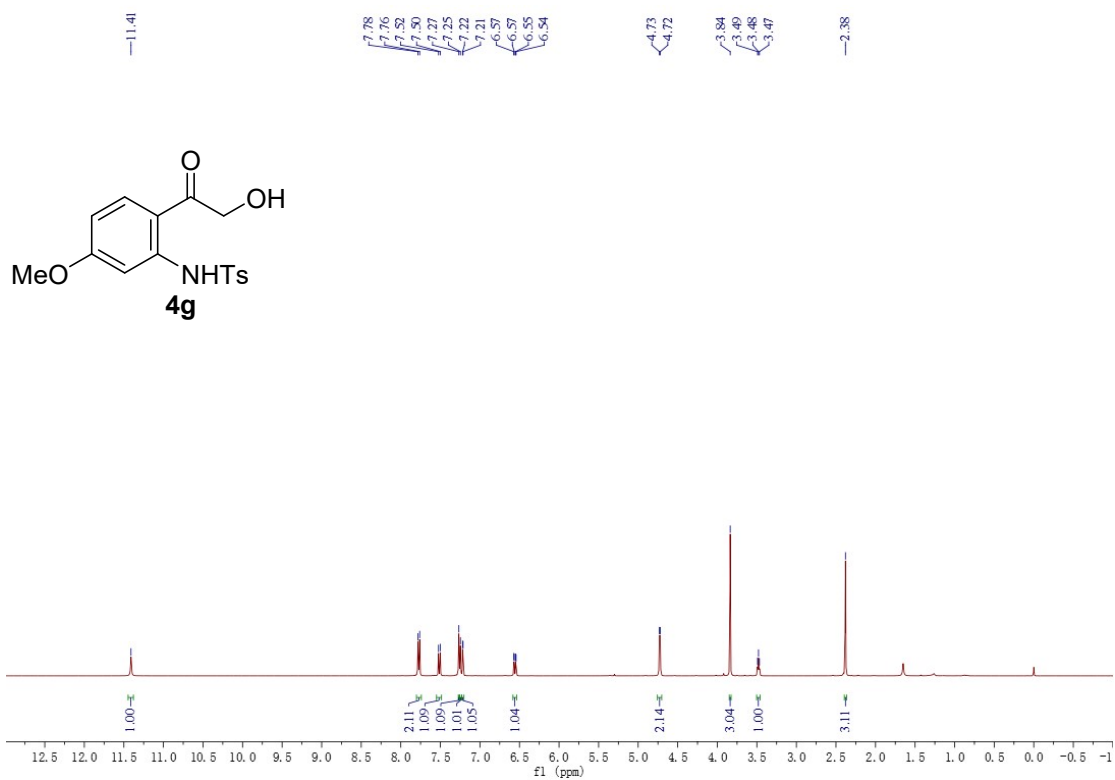

<sup>13</sup>C NMR spectrum of compound **4g** (CDCl<sub>3</sub>, 400 MHz)

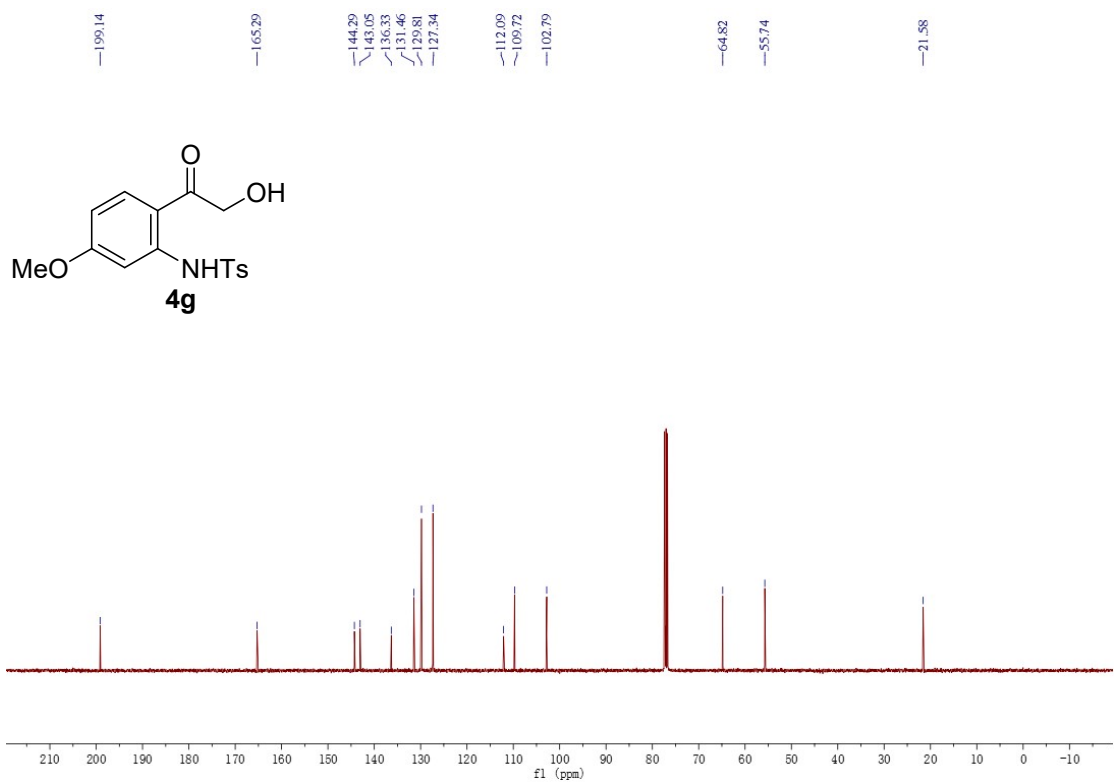

<sup>1</sup>H NMR spectrum of compound **5** (DMSO, 400 MHz)

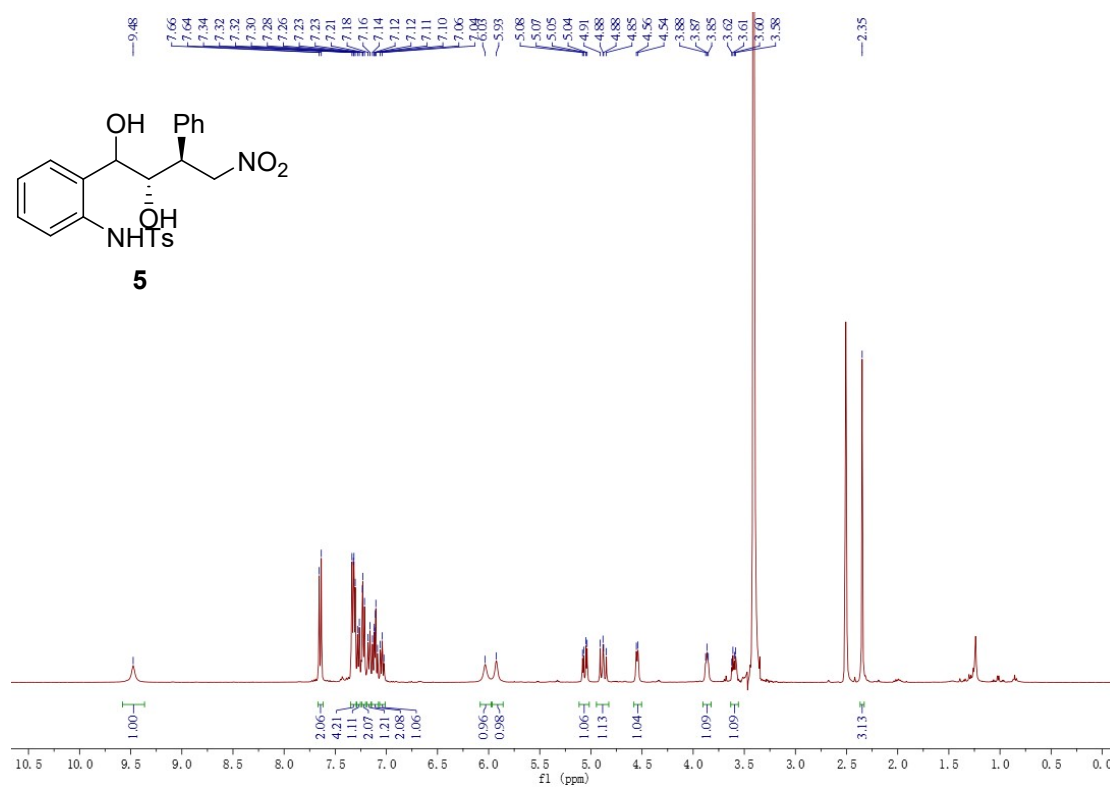

<sup>13</sup>C NMR spectrum of compound **5** (DMSO, 400 MHz)

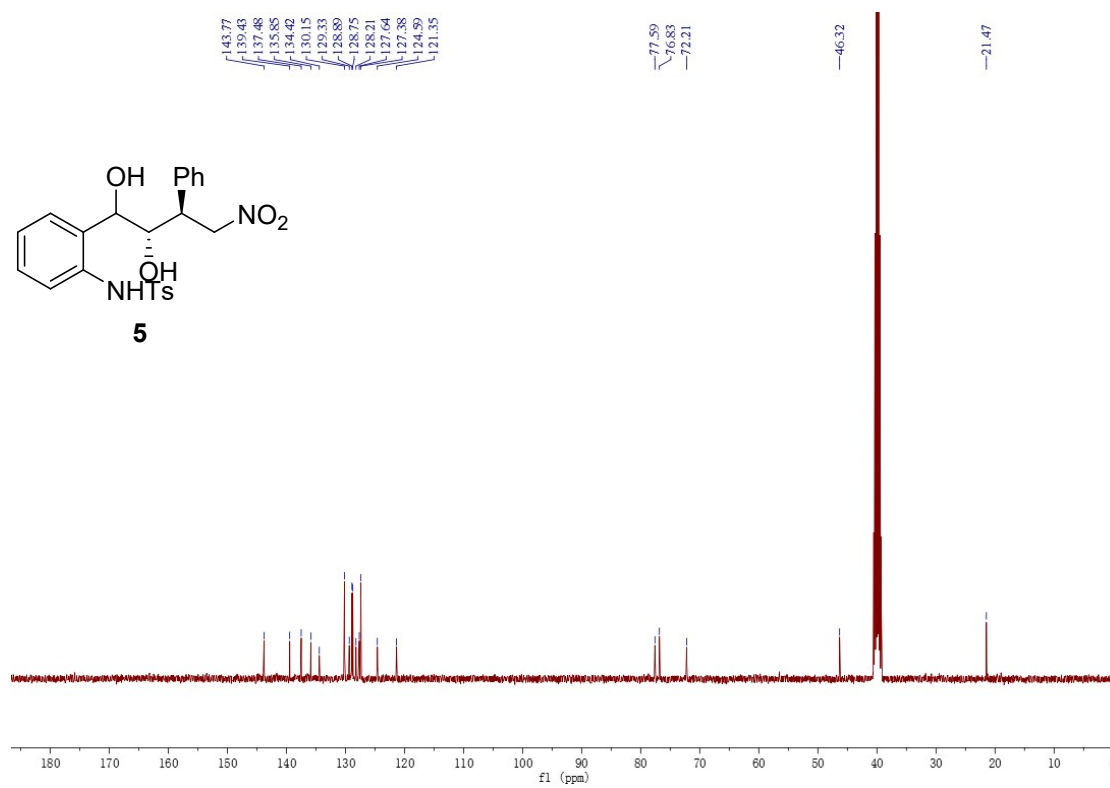



<sup>1</sup>H NMR spectrum of compound **6** (DMSO, 400 MHz)

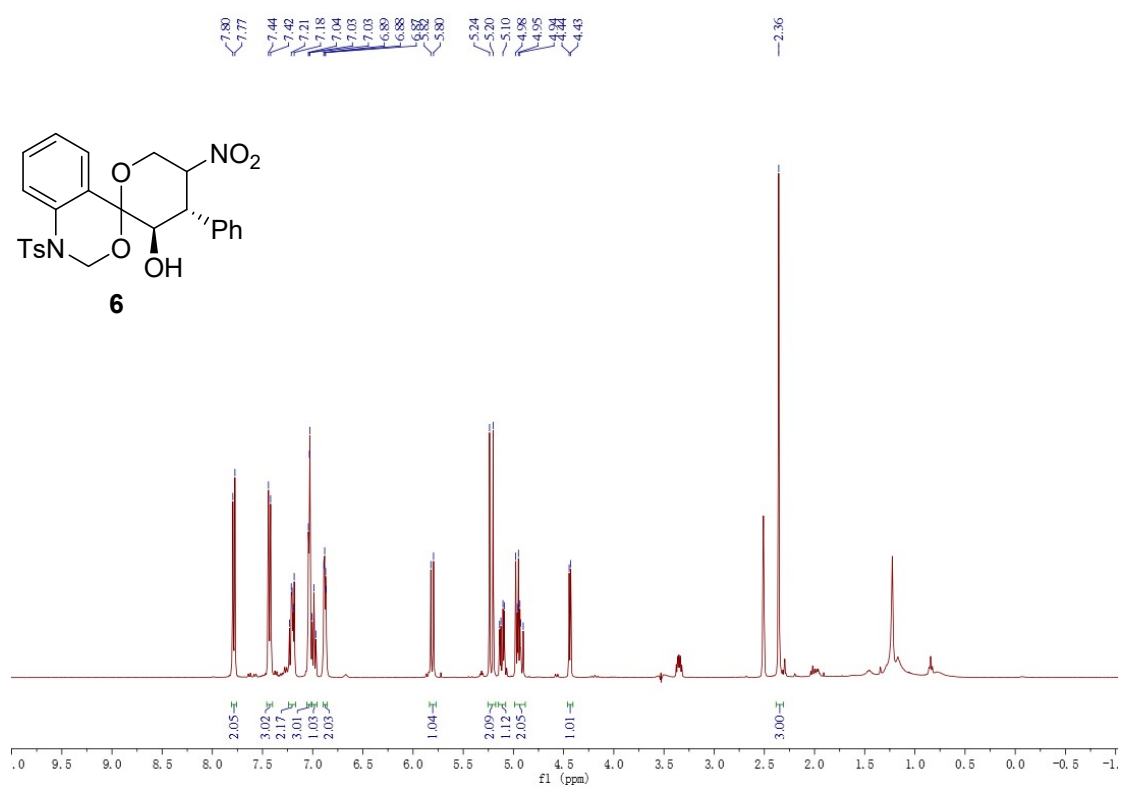

<sup>13</sup>C NMR spectrum of compound **6** (DMSO, 400 MHz)

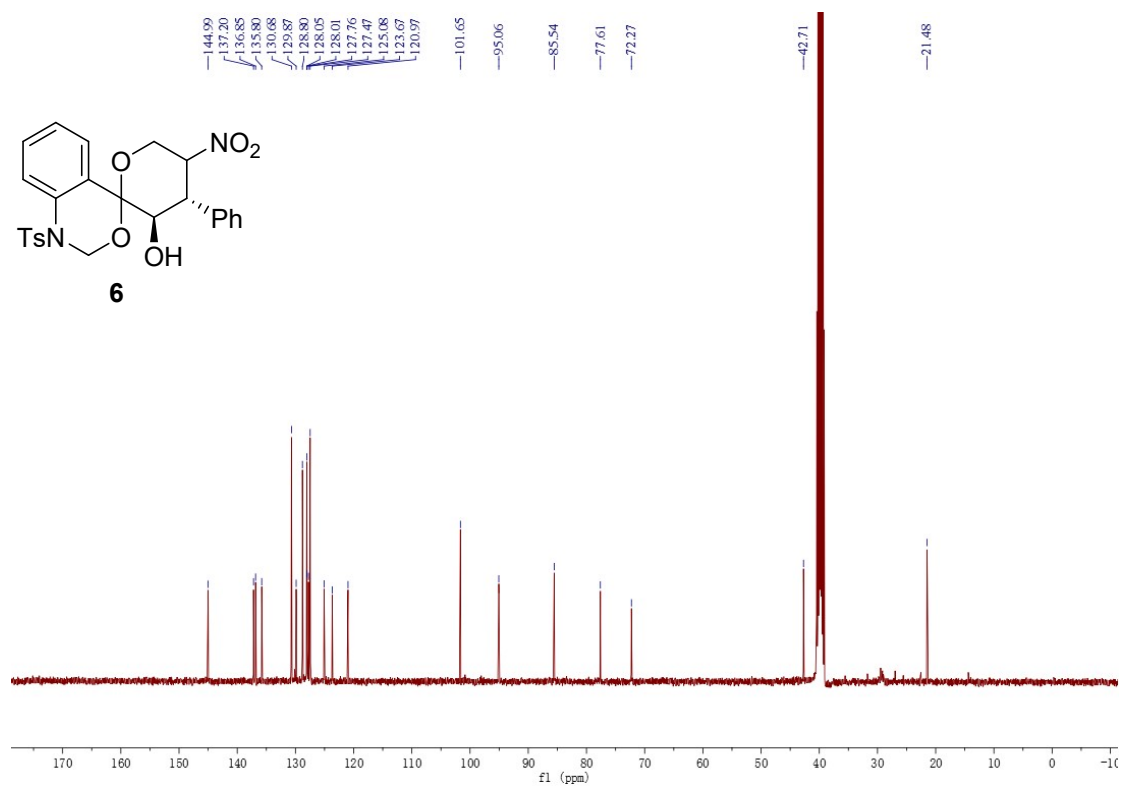

<sup>1</sup>H NMR spectrum of compound 7 (CDCl<sub>3</sub>, 400 MHz)

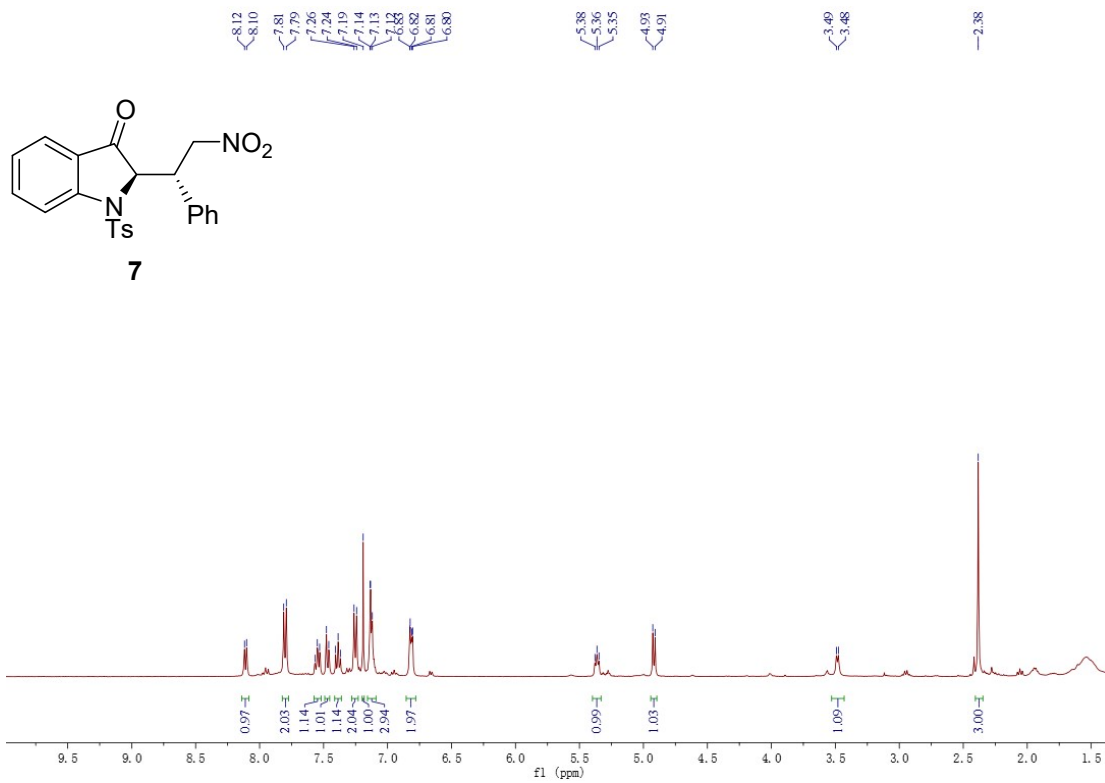

<sup>13</sup>C NMR spectrum of compound 7 (CDCl<sub>3</sub>, 400 MHz)

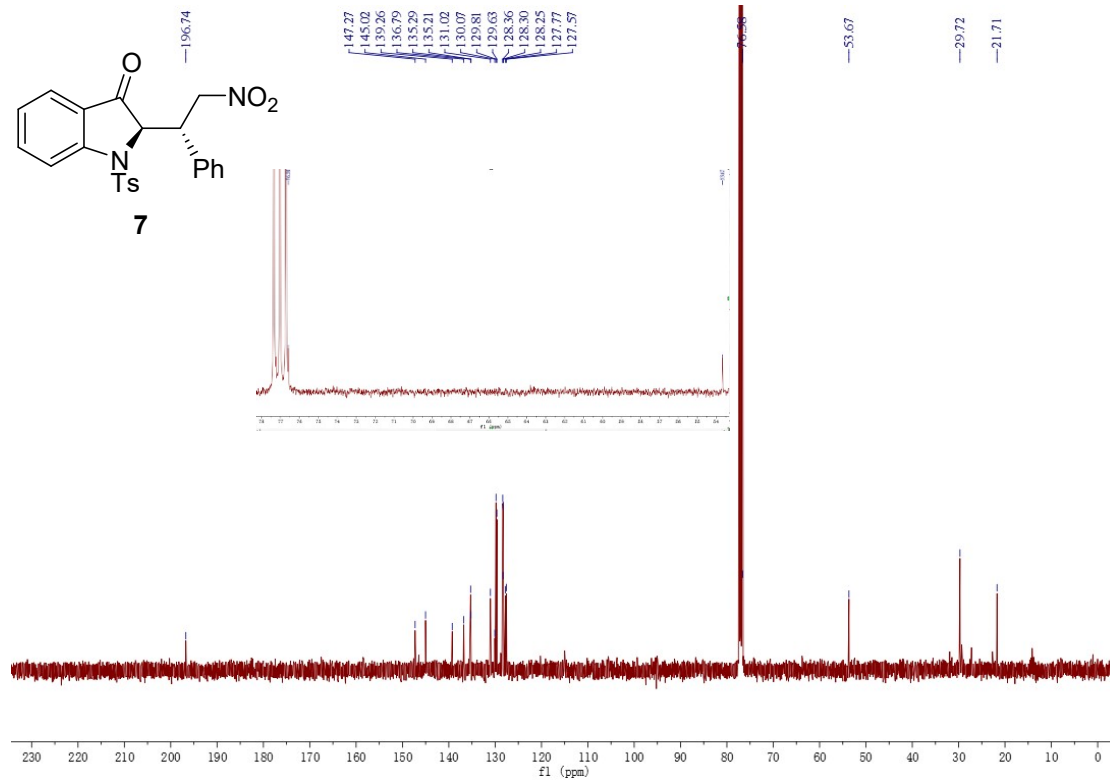

<sup>1</sup>H NMR spectrum of compound **8** (CDCl<sub>3</sub>, 400 MHz)

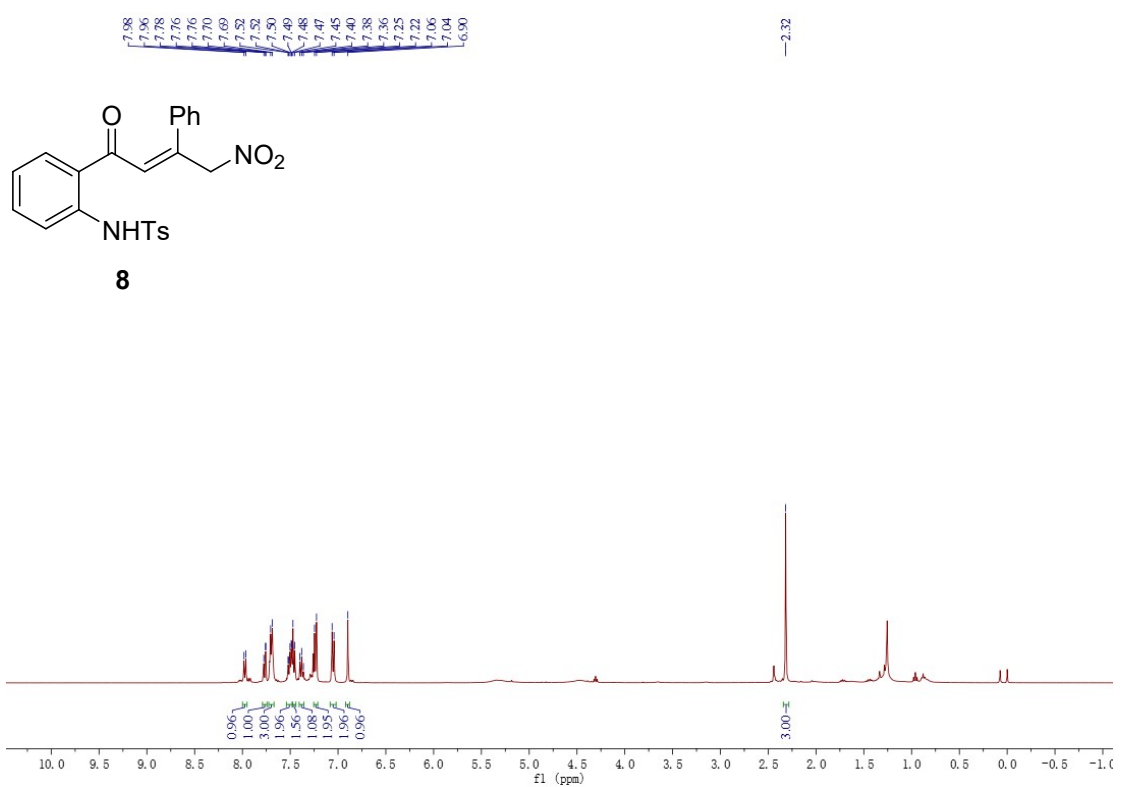

<sup>13</sup>C NMR spectrum of compound **8** (CDCl<sub>3</sub>, 400 MHz)

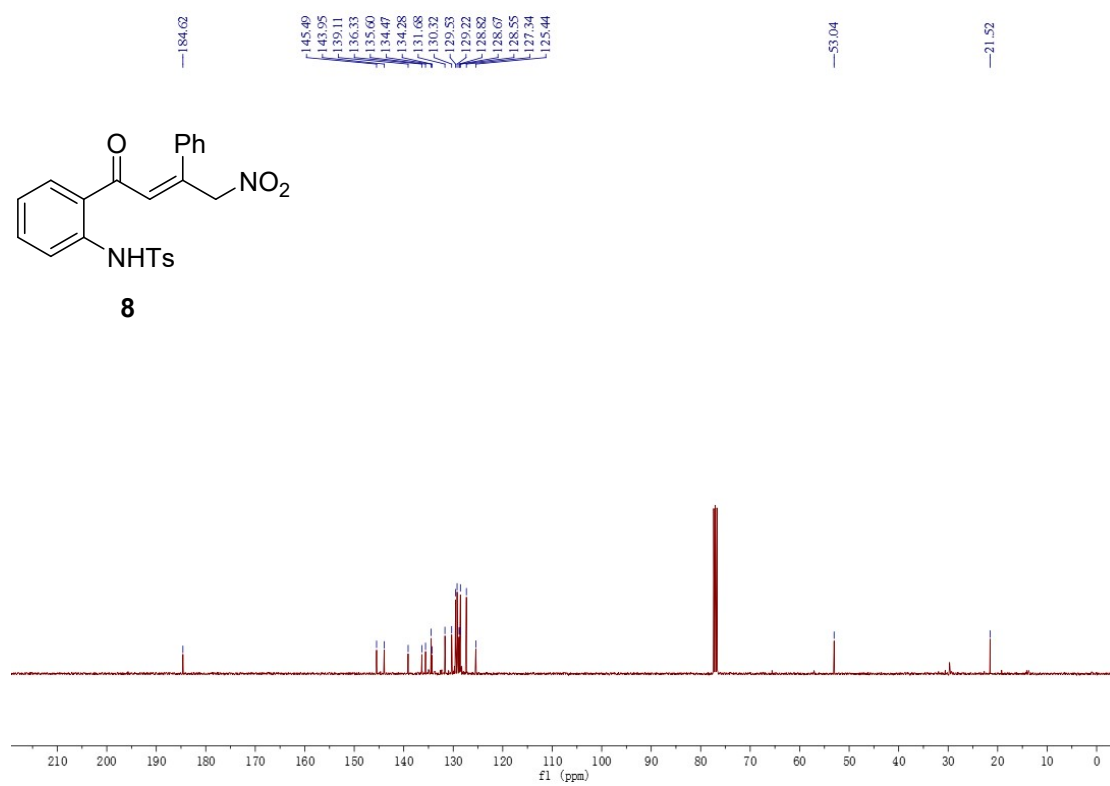

## HPLC spectra of compounds

### HPLC spectra of compound 1 and 3

rac-1a

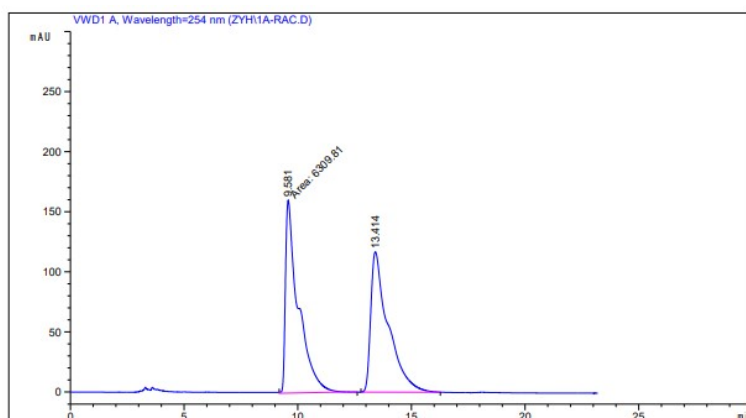

=====  
Area Percent Report  
=====

Sorted By : Signal  
Multiplier : 1.0000  
Dilution : 1.0000  
Sample Amount : 1.00000 [ng/ul] (not used in calc.)  
Use Multiplier & Dilution Factor with ISTDs

Signal 1: VWD1 A, Wavelength=254 nm

| Peak # | RetTime [min] | Type | Width [min] | Area mAU *s | Height [mAU] | Area %  |
|--------|---------------|------|-------------|-------------|--------------|---------|
| 1      | 9.581         | MM   | 0.6554      | 6309.80908  | 160.45258    | 50.2902 |
| 2      | 13.414        | BB   | 0.7380      | 6236.98437  | 116.81078    | 49.7098 |

Totals : 1.25468e4 277.26336

V

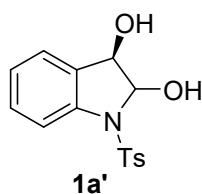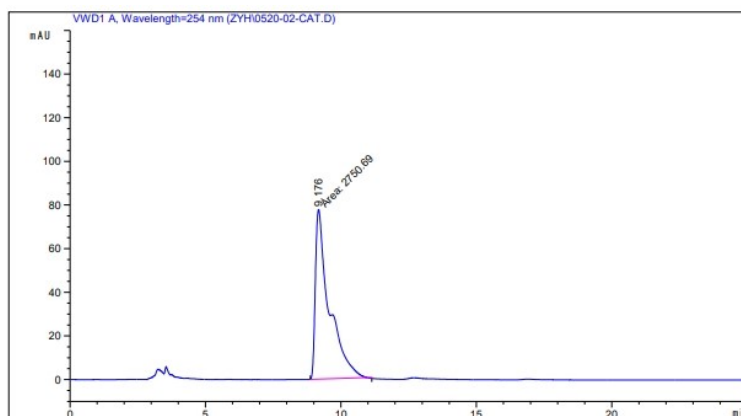

=====  
Area Percent Report  
=====

Sorted By : Signal  
Multiplier : 1.0000  
Dilution : 1.0000  
Use Multiplier & Dilution Factor with ISTDs

Signal 1: VWD1 A, Wavelength=254 nm

| Peak # | RetTime [min] | Type | Width [min] | Area mAU *s | Height [mAU] | Area %   |
|--------|---------------|------|-------------|-------------|--------------|----------|
| 1      | 9.176         | MM   | 0.5896      | 2750.69385  | 77.75069     | 100.0000 |

Totals : 2750.69385 77.75069

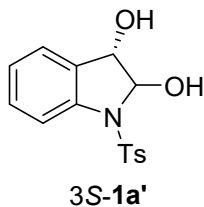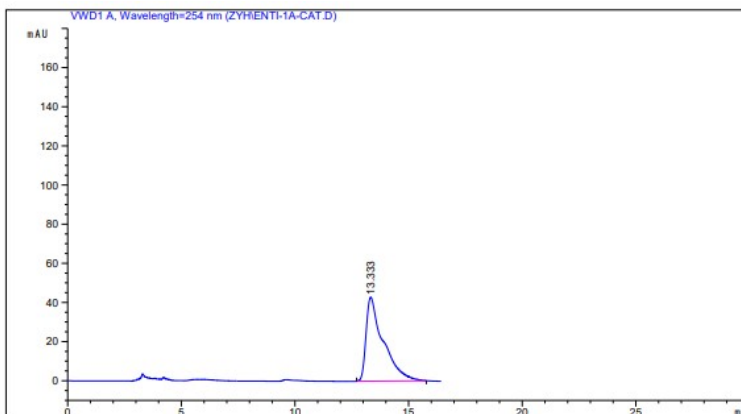

Area Percent Report

Sorted By : Signal  
Multiplier : 1.0000  
Dilution : 1.0000  
Sample Amount : 1.00000 [ng/ul] (not used in calc.)  
Use Multiplier & Dilution Factor with ISTDs

Signal 1: VWD1 A, Wavelength=254 nm

| Peak #   | RetTime [min] | Type | Width [min] | Area mAU *s | Height [mAU] | Area %   |
|----------|---------------|------|-------------|-------------|--------------|----------|
| 1        | 13.333        | BB   | 0.7272      | 2249.02026  | 42.85896     | 100.0000 |
| Totals : |               |      |             | 2249.02026  | 42.85896     |          |

**rac-1b**

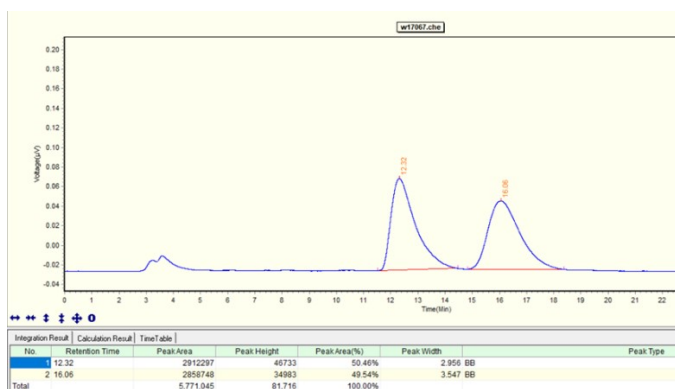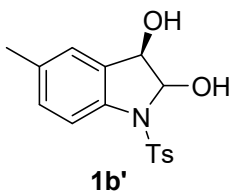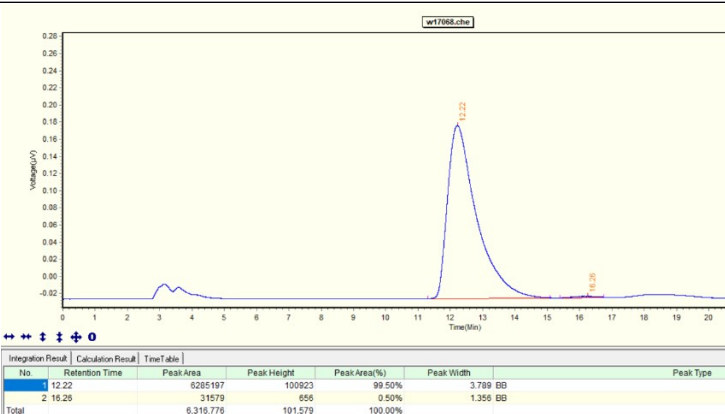

rac-1c

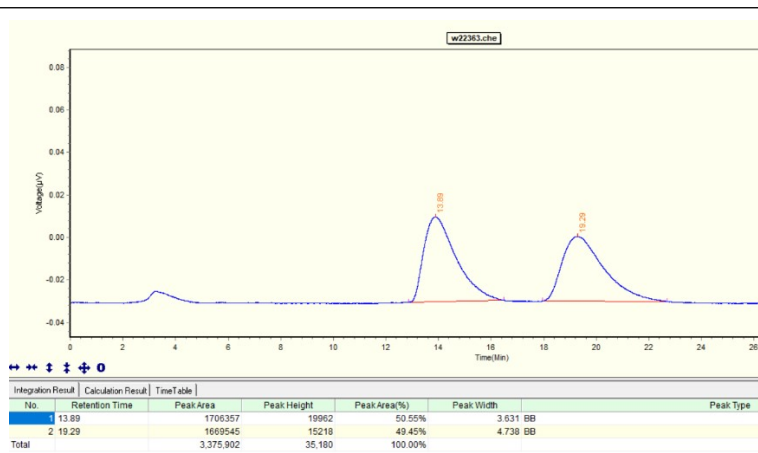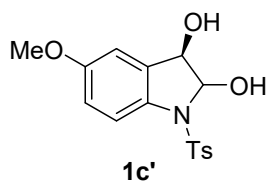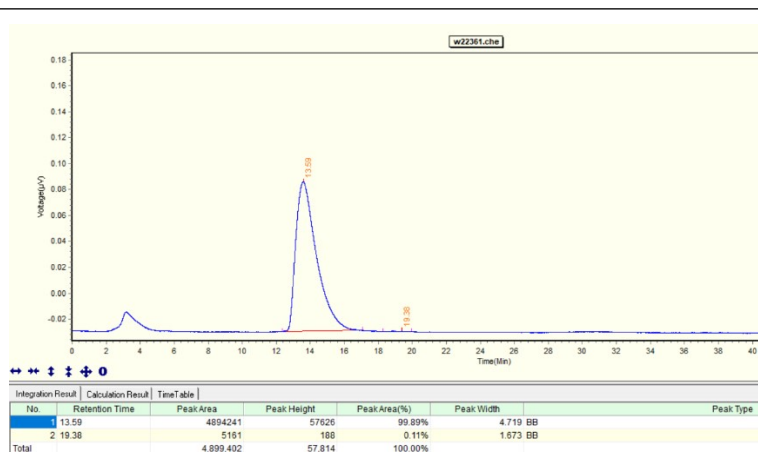

rac-1d

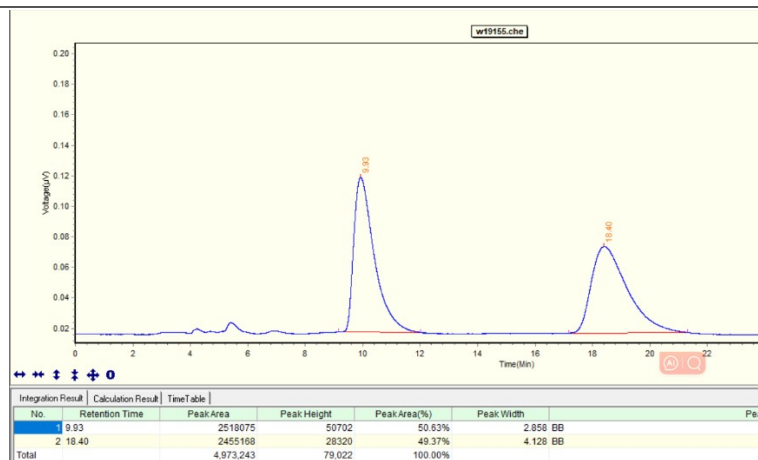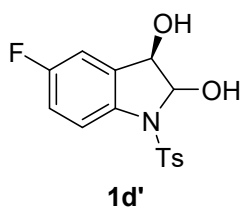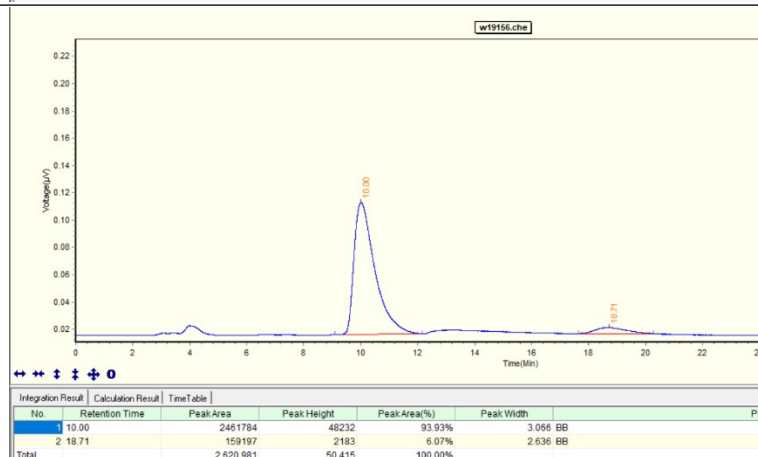

rac-1e

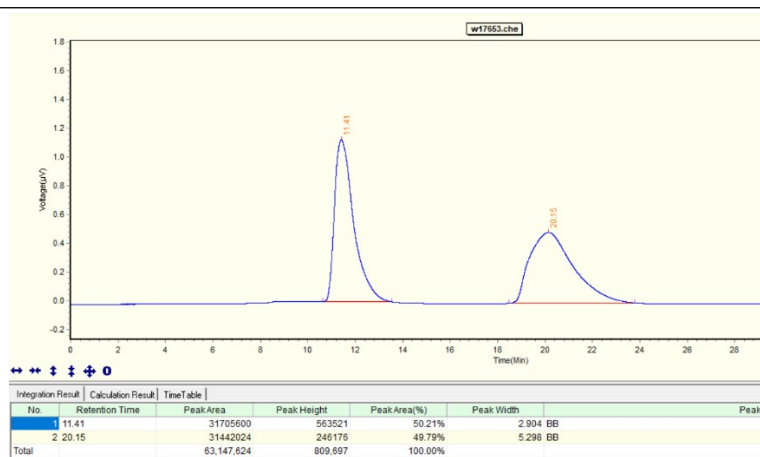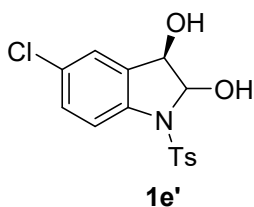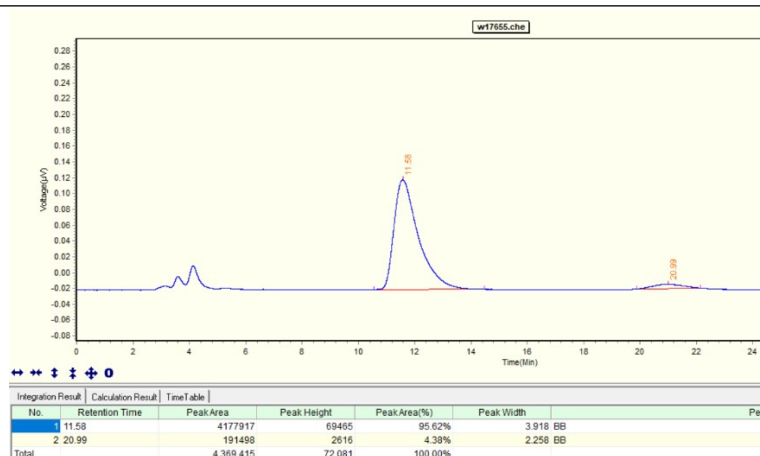

rac-1f

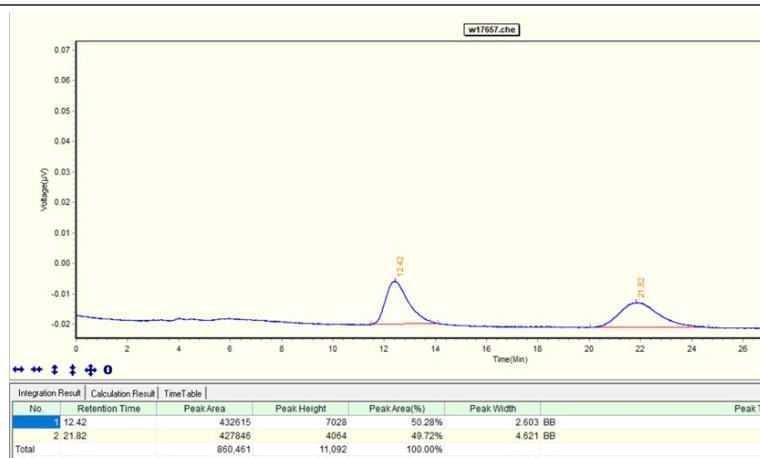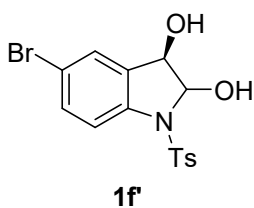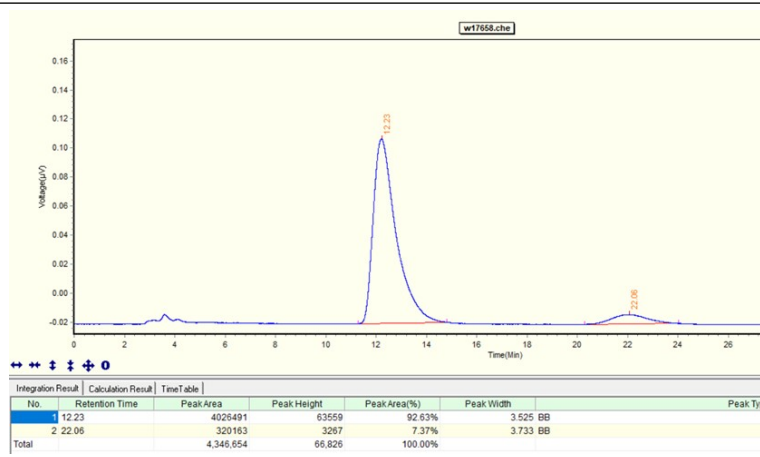

rac-1g

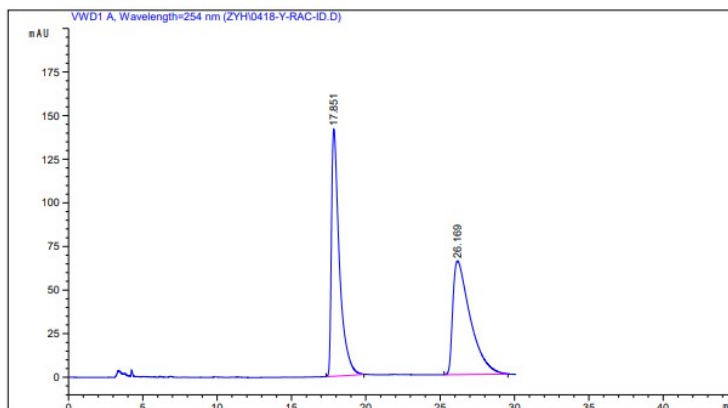

=====  
Area Percent Report  
=====

Sorted By : Signal  
Multiplier : 1.0000  
Dilution : 1.0000  
Sample Amount : 1.00000 [ng/ul] (not used in calc.)  
Use Multiplier & Dilution Factor with ISTDs

Signal 1: VWD1 A, Wavelength=254 nm

| Peak # | RetTime [min] | Type | Width [min] | Area mAU *s | Height [mAU] | Area %  |
|--------|---------------|------|-------------|-------------|--------------|---------|
| 1      | 17.851        | BB   | 0.5478      | 5269.28857  | 141.58293    | 49.8043 |
| 2      | 26.169        | BB   | 1.2017      | 5310.70801  | 65.13427     | 50.1957 |

Totals : 1.05800e4 206.71720

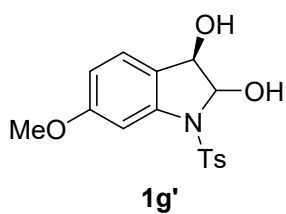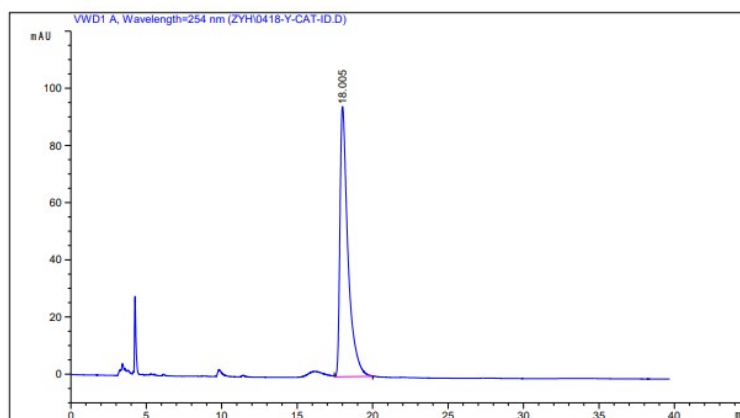

=====  
Area Percent Report  
=====

Sorted By : Signal  
Multiplier : 1.0000  
Dilution : 1.0000  
Sample Amount : 1.00000 [ng/ul] (not used in calc.)  
Use Multiplier & Dilution Factor with ISTDs

Signal 1: VWD1 A, Wavelength=254 nm

| Peak # | RetTime [min] | Type | Width [min] | Area mAU *s | Height [mAU] | Area %   |
|--------|---------------|------|-------------|-------------|--------------|----------|
| 1      | 18.005        | VB   | 0.5403      | 3477.87988  | 94.43565     | 100.0000 |

Totals : 3477.87988 94.43565



rac-3aa

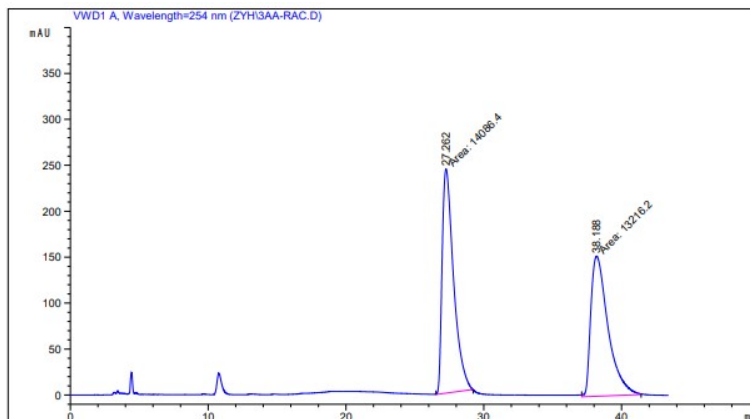

=====  
Area Percent Report  
=====

Sorted By : Signal  
Multiplier : 1.0000  
Dilution : 1.0000  
Sample Amount : 1.00000 [ng/ul] (not used in calc.)  
Use Multiplier & Dilution Factor with ISTDs

Signal 1: VWD1 A, Wavelength=254 nm

| Peak # | RetTime [min] | Type | Width [min] | Area mAU *s | Height [mAU] | Area %  |
|--------|---------------|------|-------------|-------------|--------------|---------|
| 1      | 27.262        | MM   | 0.9631      | 1.40864e4   | 243.75916    | 51.5936 |
| 2      | 38.188        | MM   | 1.4453      | 1.32162e4   | 152.40382    | 48.4064 |

Totals : 2.73026e4 396.16298

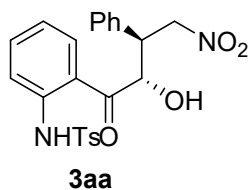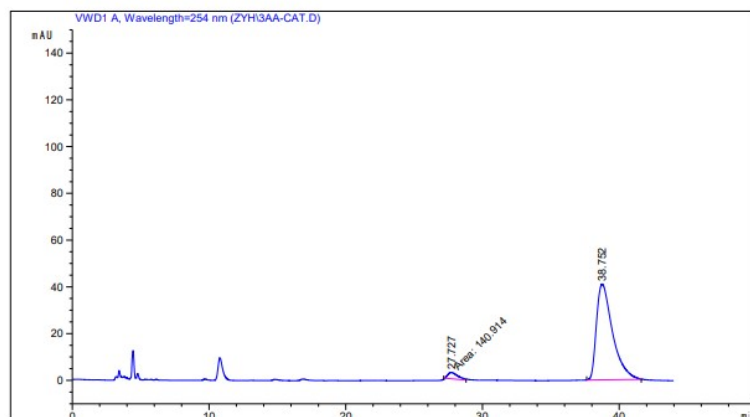

=====  
Area Percent Report  
=====

Sorted By : Signal  
Multiplier : 1.0000  
Dilution : 1.0000  
Sample Amount : 1.00000 [ng/ul] (not used in calc.)  
Use Multiplier & Dilution Factor with ISTDs

Signal 1: VWD1 A, Wavelength=254 nm

| Peak # | RetTime [min] | Type | Width [min] | Area mAU *s | Height [mAU] | Area %  |
|--------|---------------|------|-------------|-------------|--------------|---------|
| 1      | 27.727        | MM   | 0.8538      | 140.91402   | 2.75071      | 4.0435  |
| 2      | 38.752        | BB   | 1.2288      | 3344.06616  | 40.97520     | 95.9565 |

Totals : 3484.98018 43.72592

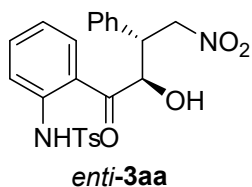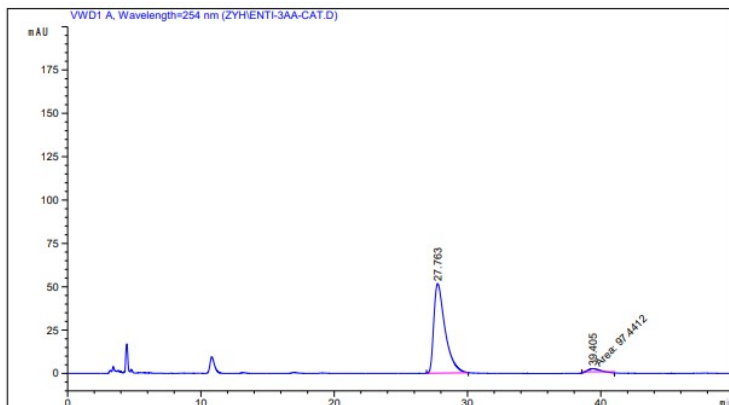

Area Percent Report

Sorted By : Signal  
Multiplier : 1.0000  
Dilution : 1.0000  
Sample Amount : 1.00000 [ng/ul] (not used in calc.)  
Use Multiplier & Dilution Factor with ISTDs

Signal 1: VWD1 A, Wavelength=254 nm

| Peak #   | RetTime [min] | Type | Width [min] | Area mAU*s | Height [mAU] | Area %  |
|----------|---------------|------|-------------|------------|--------------|---------|
| 1        | 27.763        | BB   | 0.8768      | 3027.93872 | 51.59699     | 96.8823 |
| 2        | 39.405        | MM   | 0.9001      | 97.44121   | 1.80431      | 3.1177  |
| Totals : |               |      |             | 3125.37993 | 53.40130     |         |

**rac-3ba**

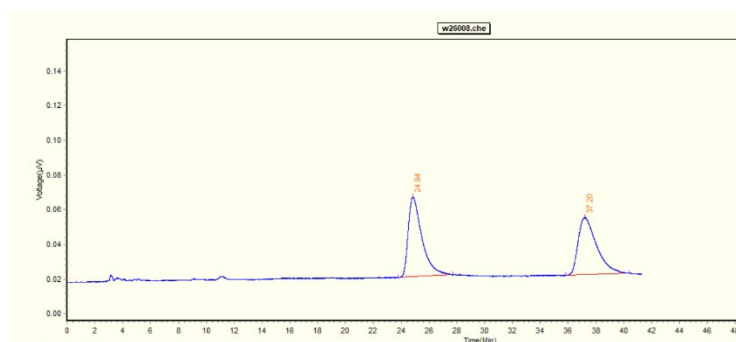

| No.   | Retention Time | Peak Area | Peak Height | Peak Area(%) | Peak Width | Peak Type |
|-------|----------------|-----------|-------------|--------------|------------|-----------|
| 1     | 24.84          | 1570171   | 22977       | 50.85%       | 3.918      | BB        |
| 2     | 37.20          | 1517709   | 16501       | 49.15%       | 4.557      | BB        |
| Total |                | 3,087,880 | 39,478      | 100.00%      |            |           |

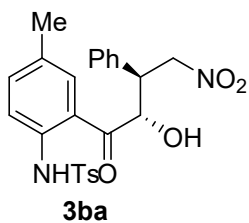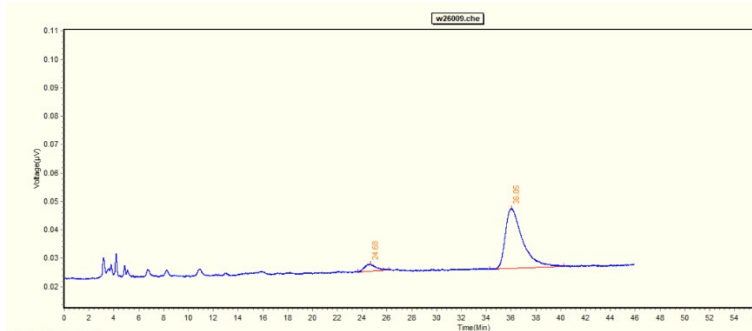

| No.   | Retention Time | Peak Area | Peak Height | Peak Area(%) | Peak Width | Peak Type |
|-------|----------------|-----------|-------------|--------------|------------|-----------|
| 1     | 24.68          | 73795     | 1214        | 6.82%        | 2.475      | BB        |
| 2     | 36.95          | 1003321   | 10498       | 93.18%       | 5.95       | BB        |
| Total |                | 1,082,086 | 11,712      | 100.00%      |            |           |

rac-3ca

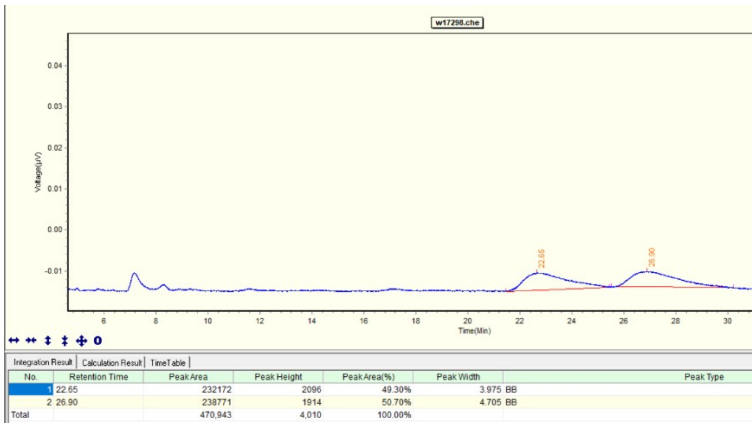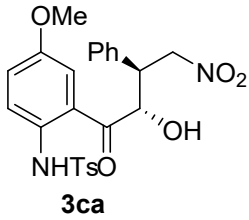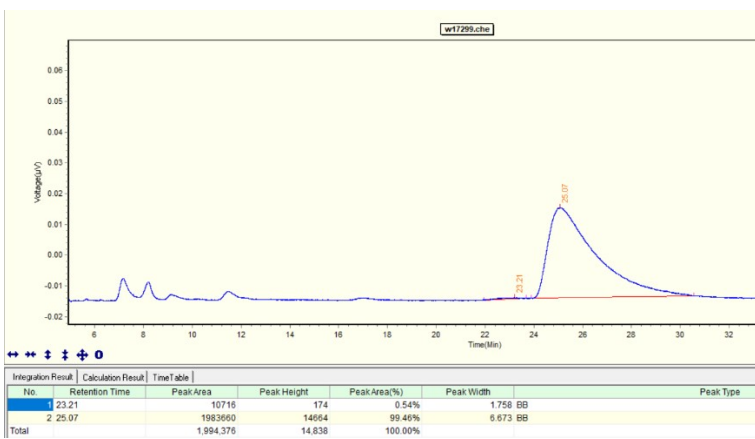

rac-3da

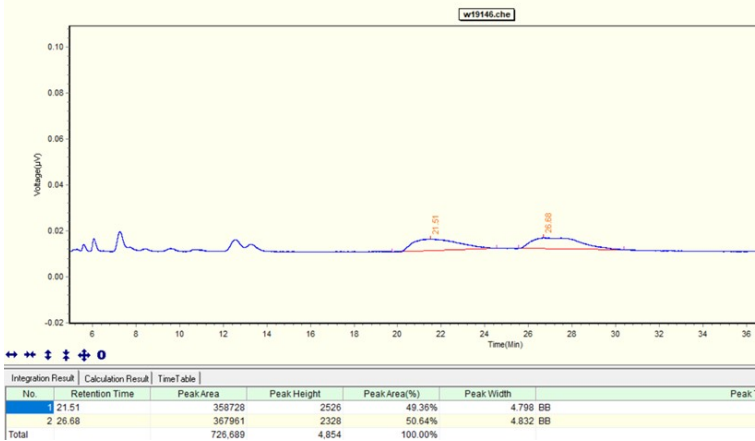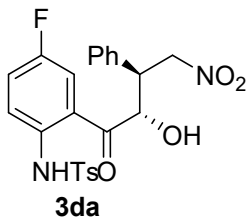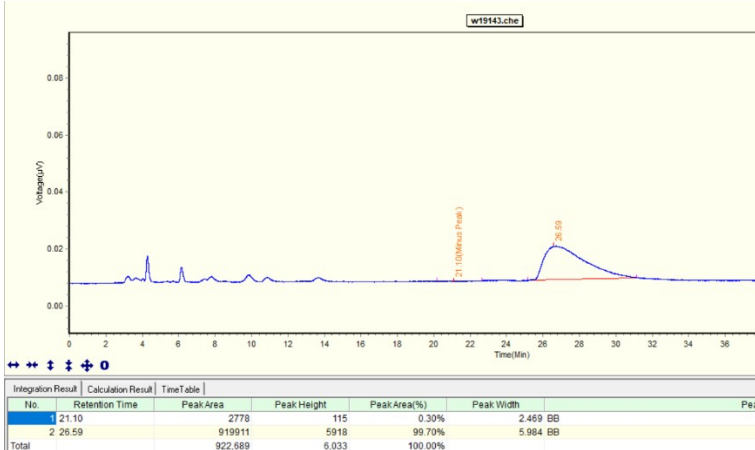

rac-3ea

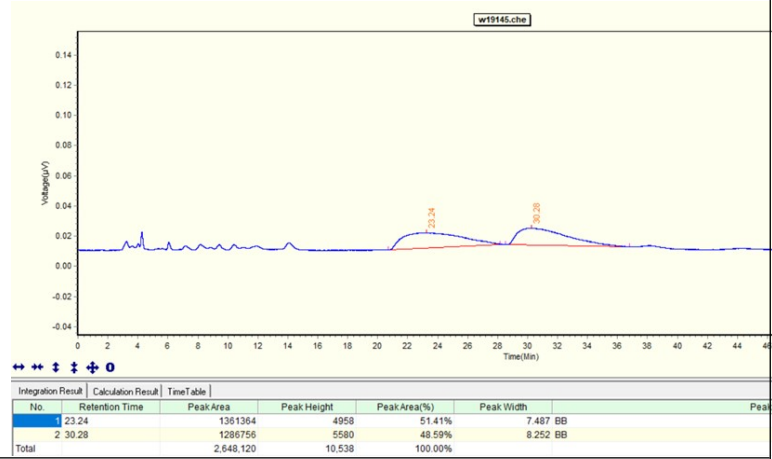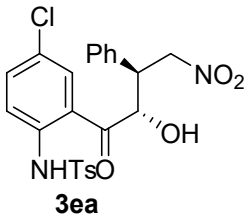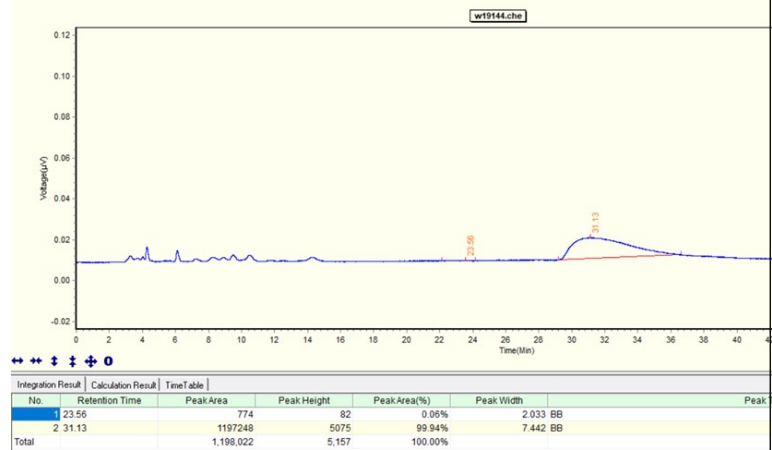

rac-3fa

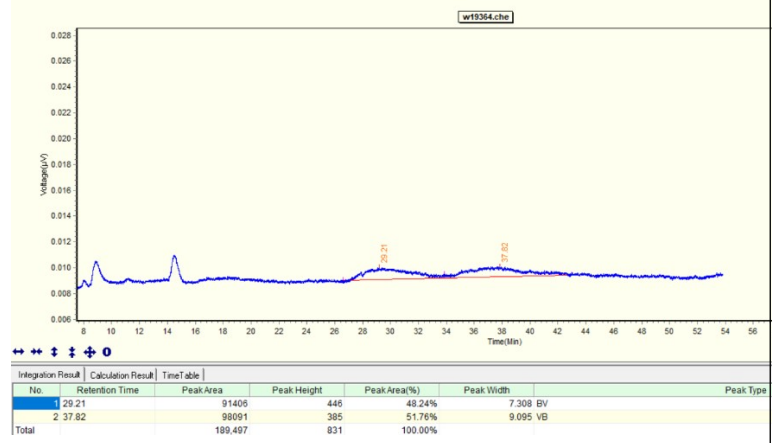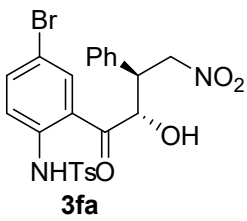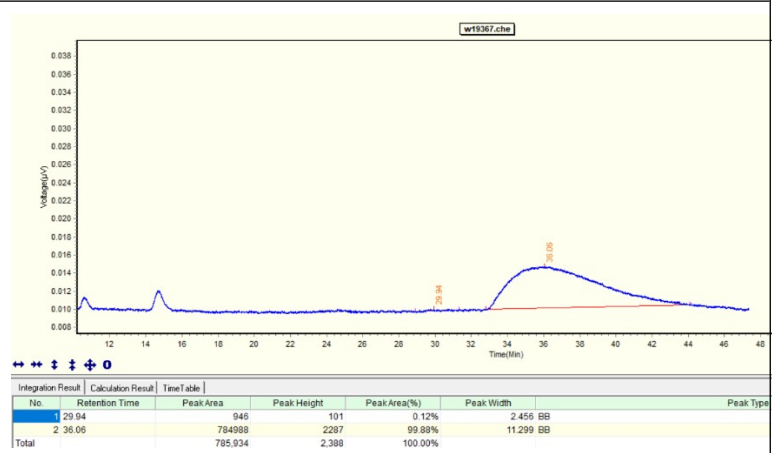

rac-3ga

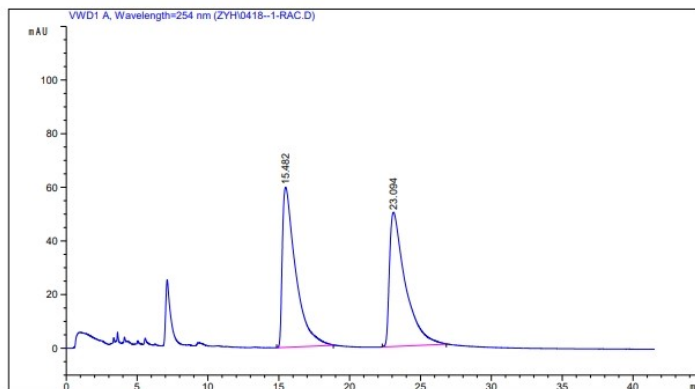

Area Percent Report

Sorted By : Signal  
Multiplier : 1.0000  
Dilution : 1.0000  
Sample Amount : 1.00000 [ng/ul] (not used in calc.)  
Use Multiplier & Dilution Factor with ISTDs

Signal 1: VWD1 A, Wavelength=254 nm

| Peak # | RetTime [min] | Type | Width [min] | Area mAU *s | Height [mAU] | Area %  |
|--------|---------------|------|-------------|-------------|--------------|---------|
| 1      | 15.482        | BB   | 0.9477      | 3933.90894  | 59.71409     | 50.2130 |
| 2      | 23.094        | BB   | 1.1104      | 3900.53296  | 50.03833     | 49.7870 |

Totals : 7834.44189 109.75242

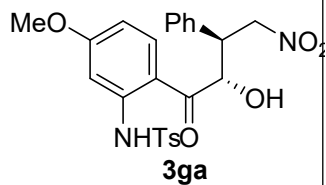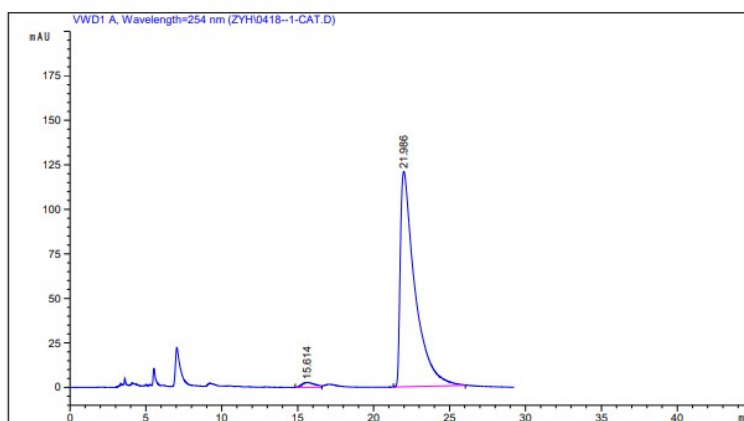

Area Percent Report

Sorted By : Signal  
Multiplier : 1.0000  
Dilution : 1.0000  
Sample Amount : 1.00000 [ng/ul] (not used in calc.)  
Use Multiplier & Dilution Factor with ISTDs

Signal 1: VWD1 A, Wavelength=254 nm

| Peak # | RetTime [min] | Type | Width [min] | Area mAU *s | Height [mAU] | Area %  |
|--------|---------------|------|-------------|-------------|--------------|---------|
| 1      | 15.614        | BV   | 0.8509      | 162.53969   | 2.68320      | 1.9654  |
| 2      | 21.986        | BB   | 0.9512      | 8107.35889  | 120.90555    | 98.0346 |

Totals : 8269.89857 123.58875

rac-3cb

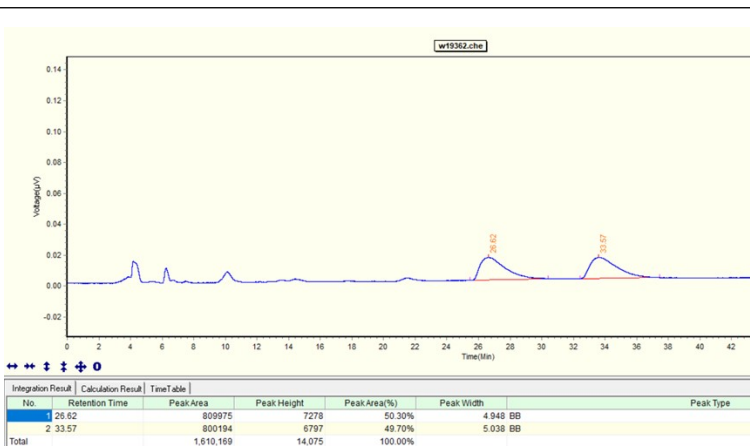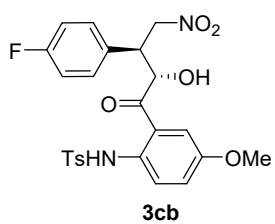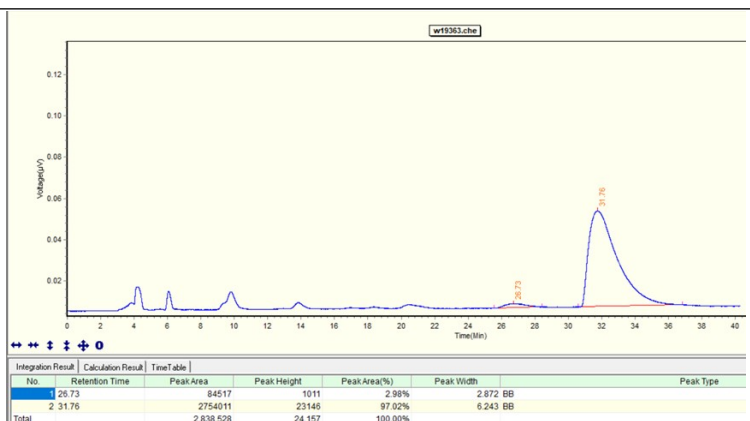

rac-3cc

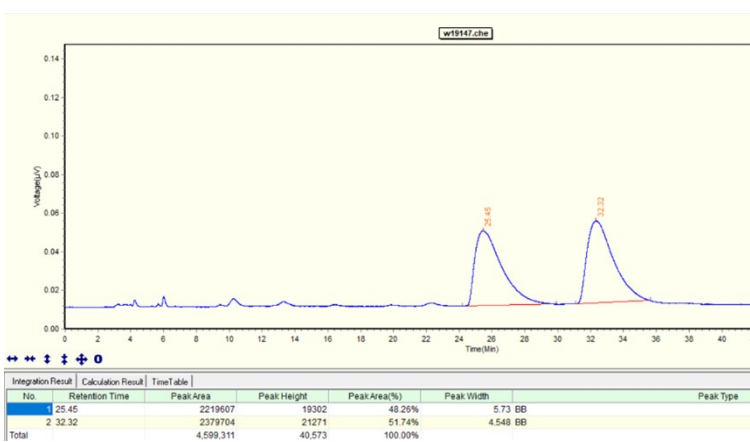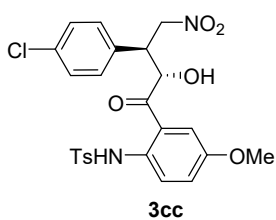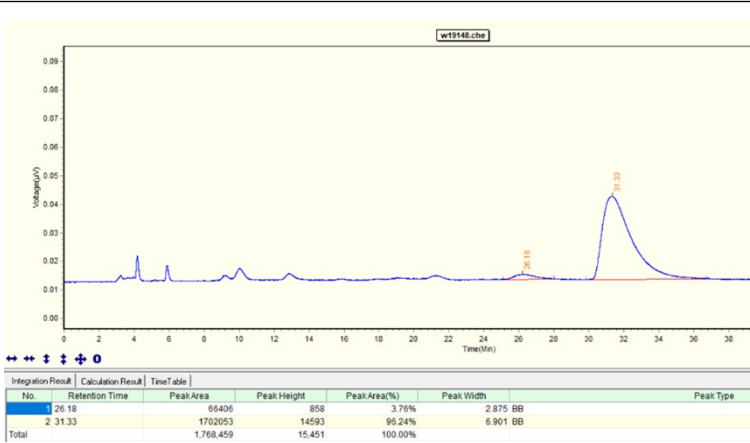

rac-3cd

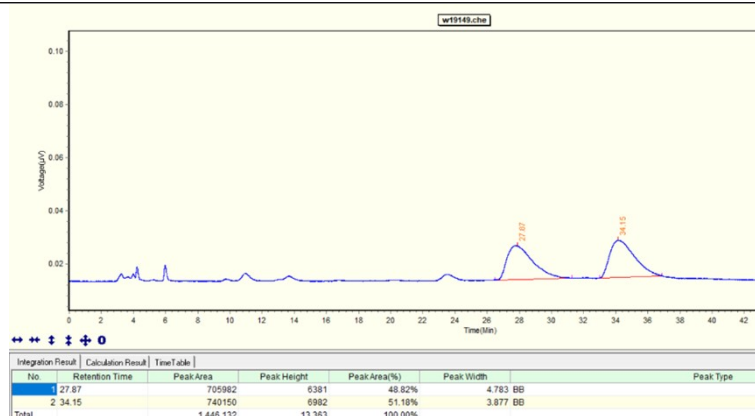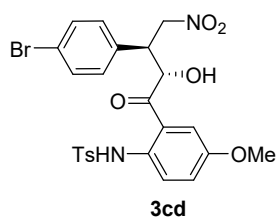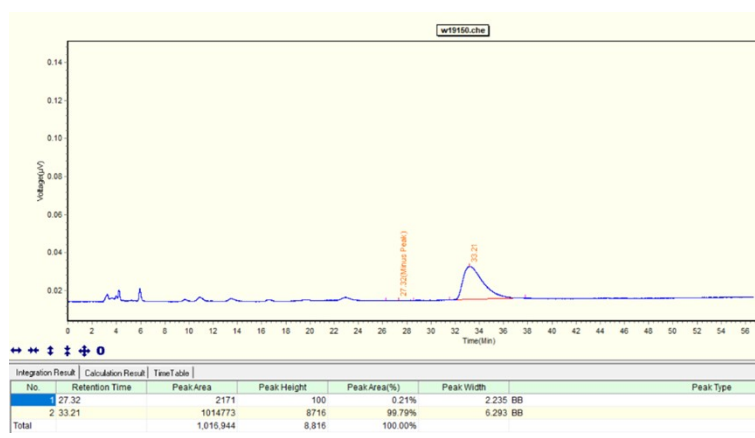

rac-3ce

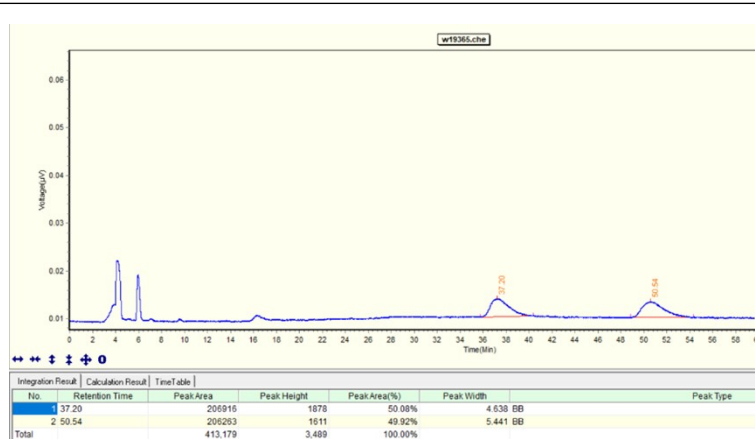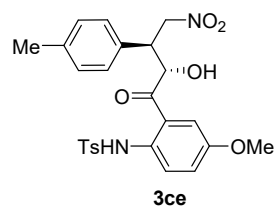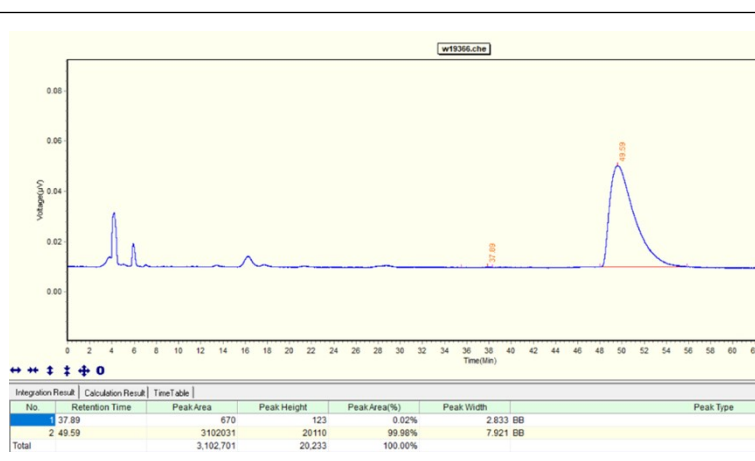

rac-3cf

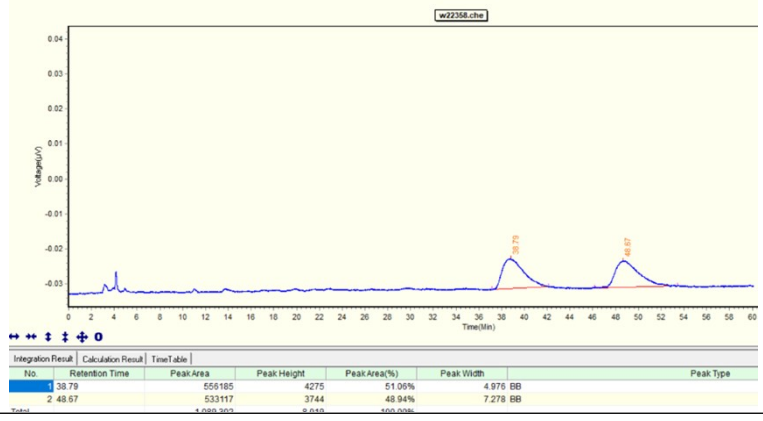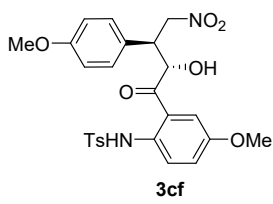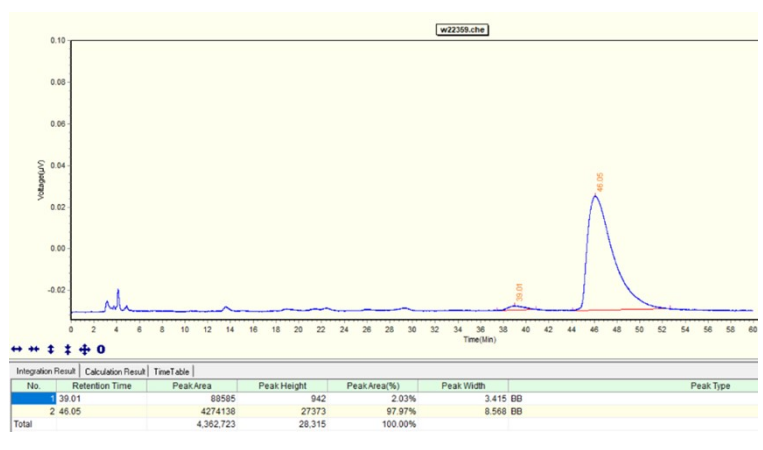

rac-3cg

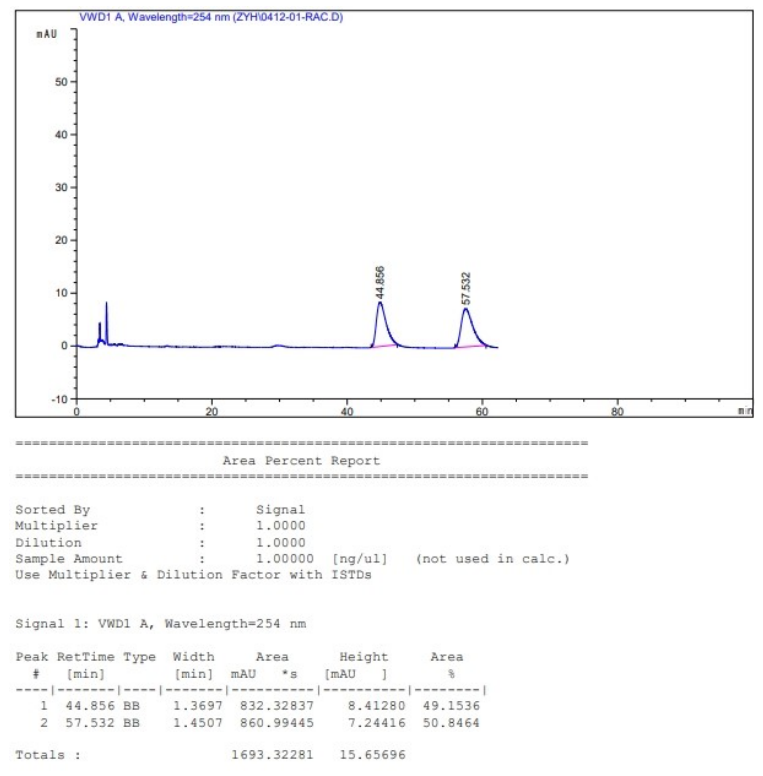



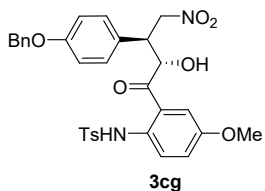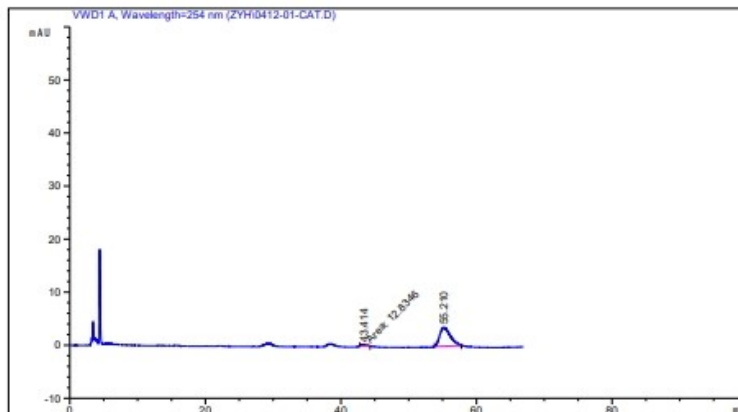

Area Percent Report

Sorted By : Signal  
Multiplier : 1.0000  
Dilution : 1.0000  
Sample Amount : 1.00000 [ng/ul] (not used in calc.)  
Use Multiplier & Dilution Factor with ISTDs

Signal 1: VWD1 A, Wavelength=254 nm

| Peak #   | RetTime [min] | Type | Width [min] | Area mAU  | Height *s [mAU] | Area %  |
|----------|---------------|------|-------------|-----------|-----------------|---------|
| 1        | 43.414        | MM   | 0.9151      | 12.82464  | 2.33765e-1      | 3.2524  |
| 2        | 55.210        | BB   | 1.2728      | 381.78671 | 3.52790         | 96.7476 |
| Totals : |               |      |             | 394.62136 | 3.76166         |         |

**rac-3ch**

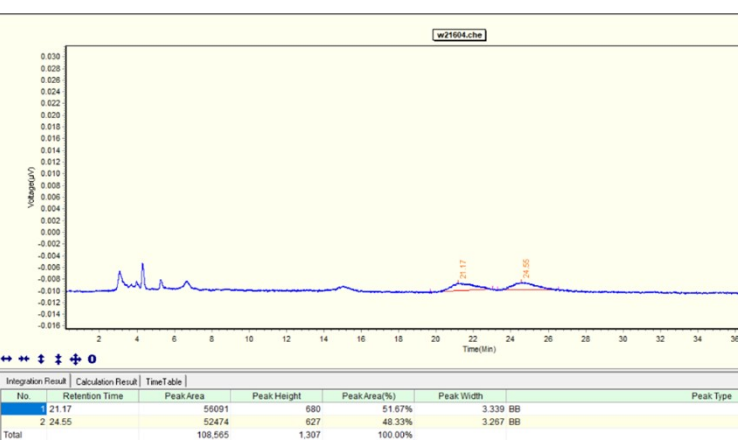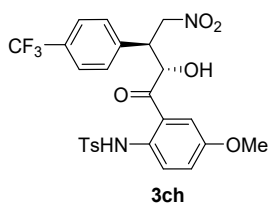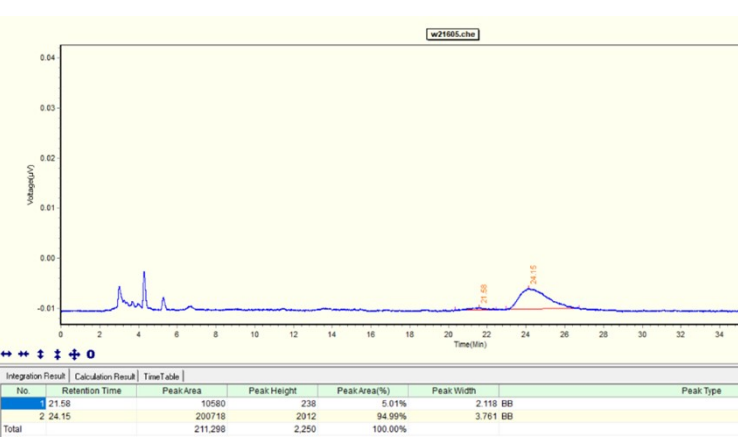

rac-3ci

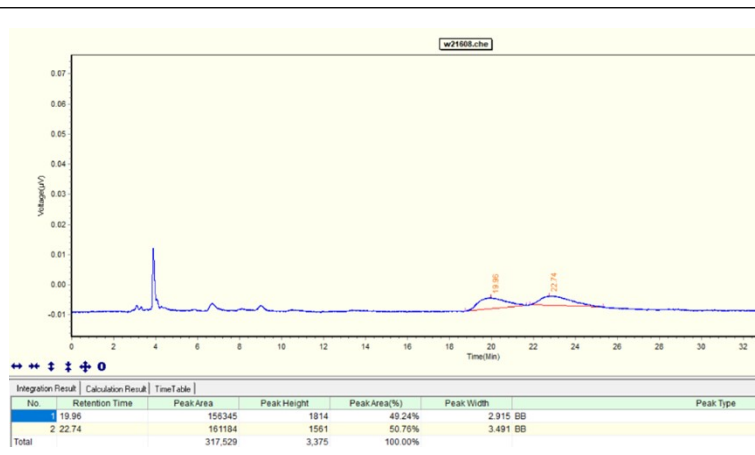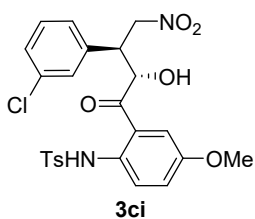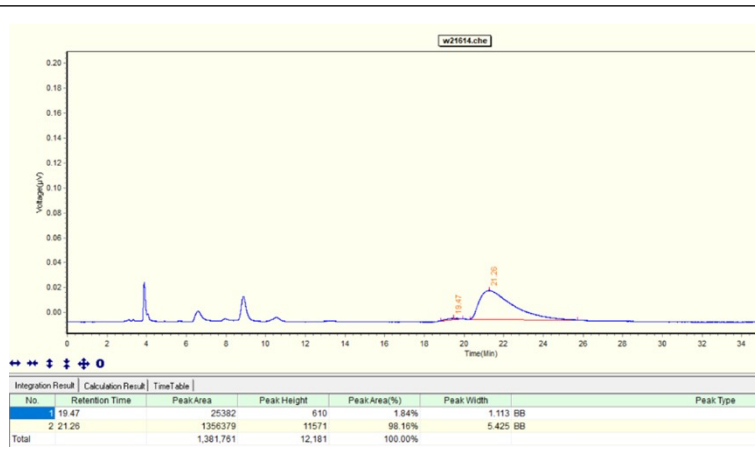

rac-3cj

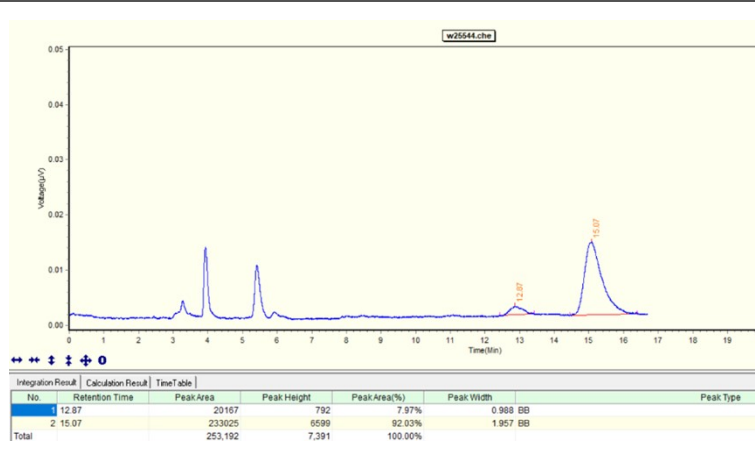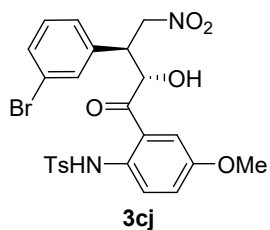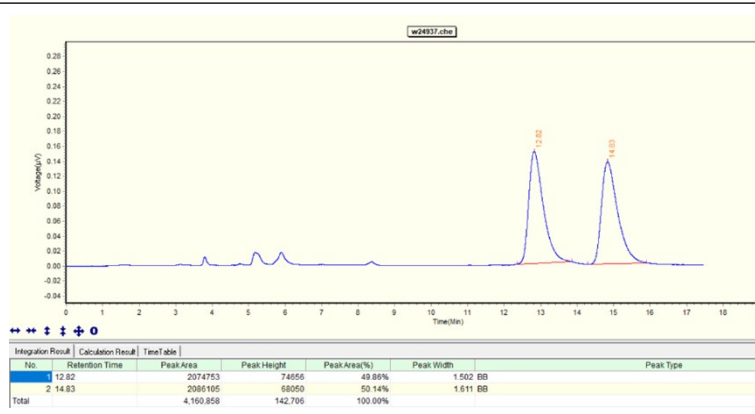

rac-3ck

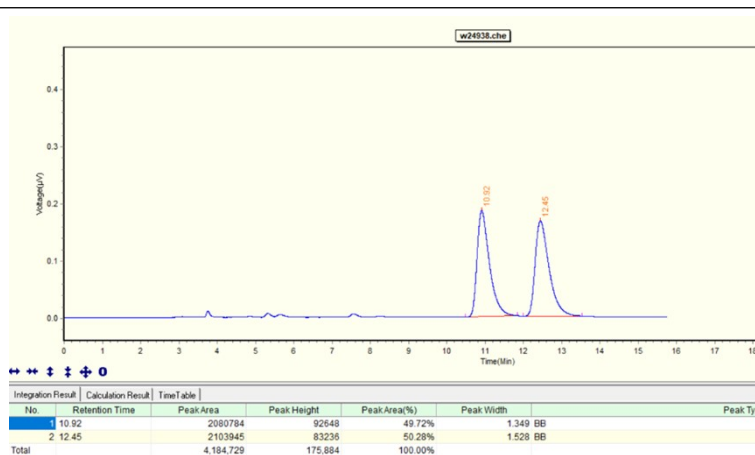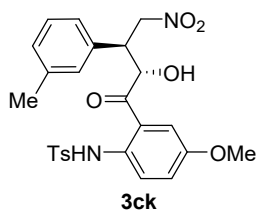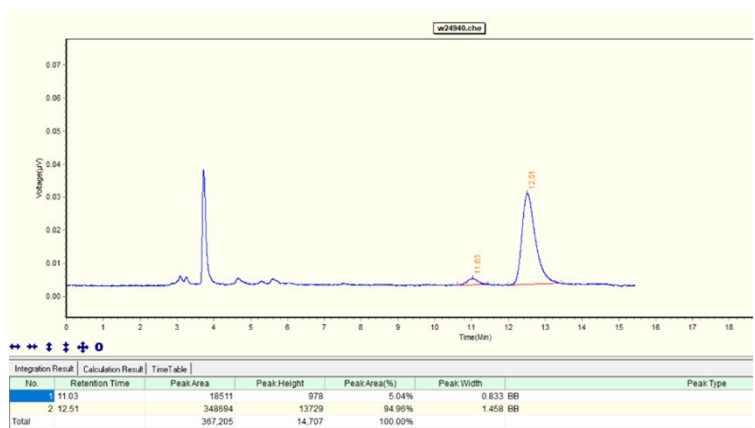

rac-3cl

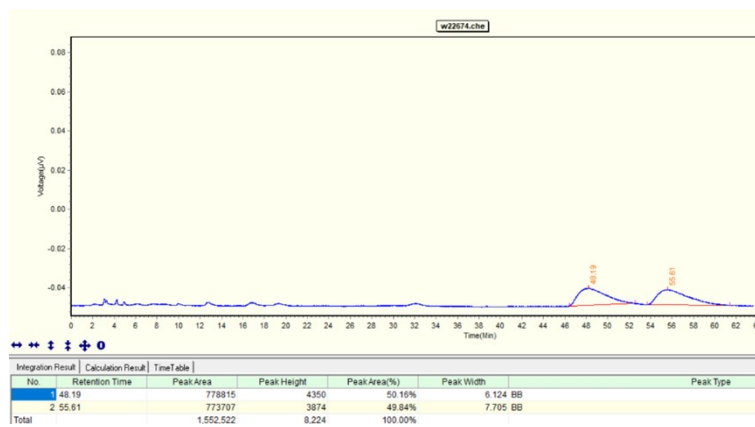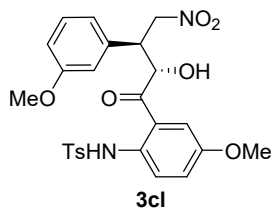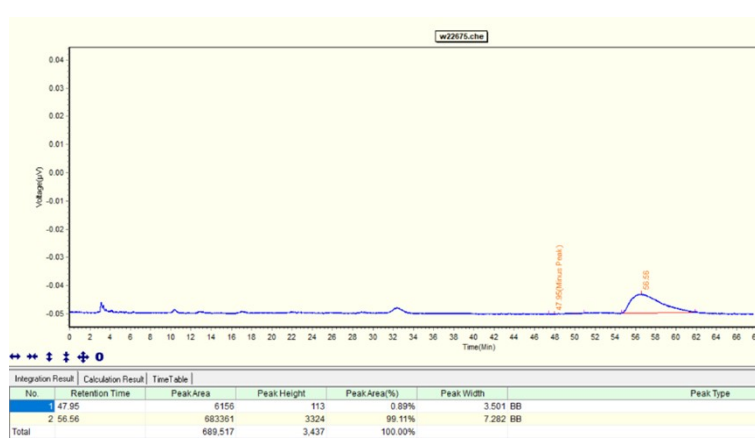

rac-3cm

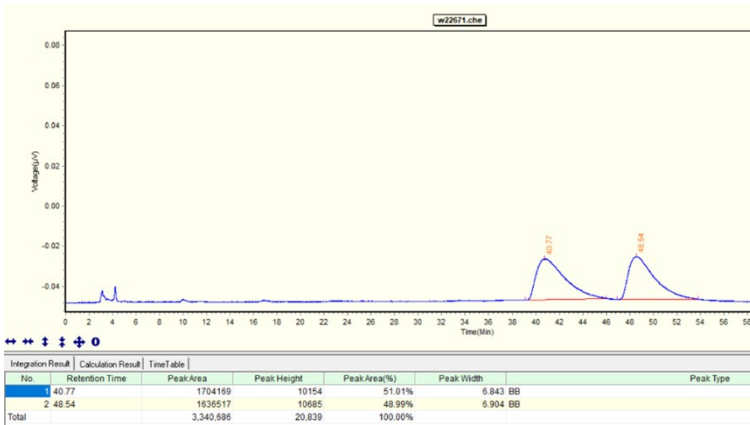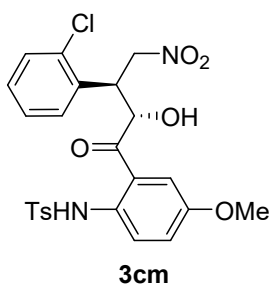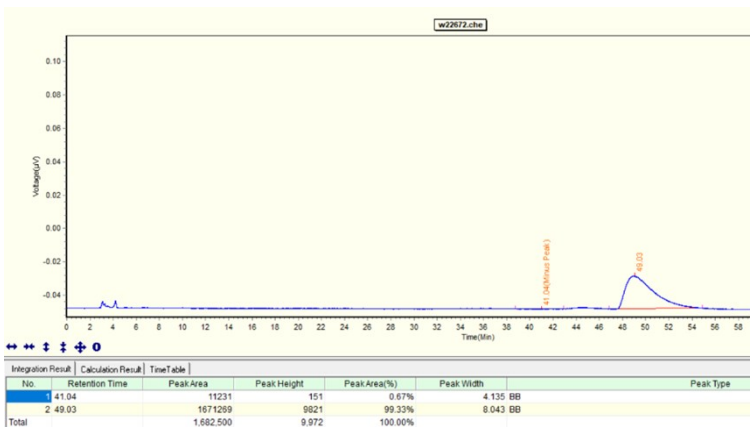

rac-3cn

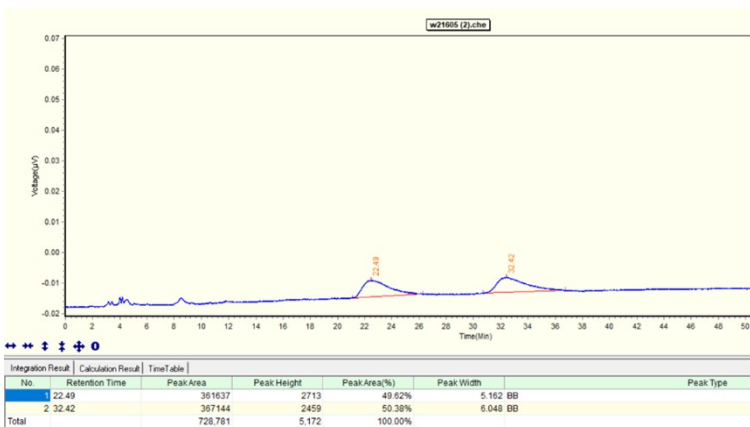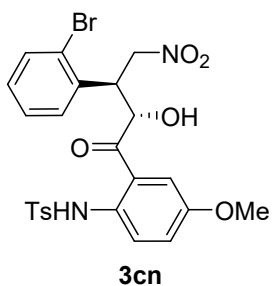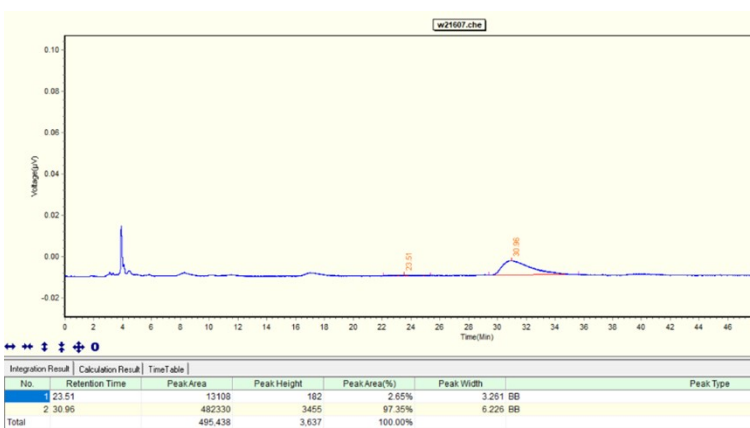

rac-3co

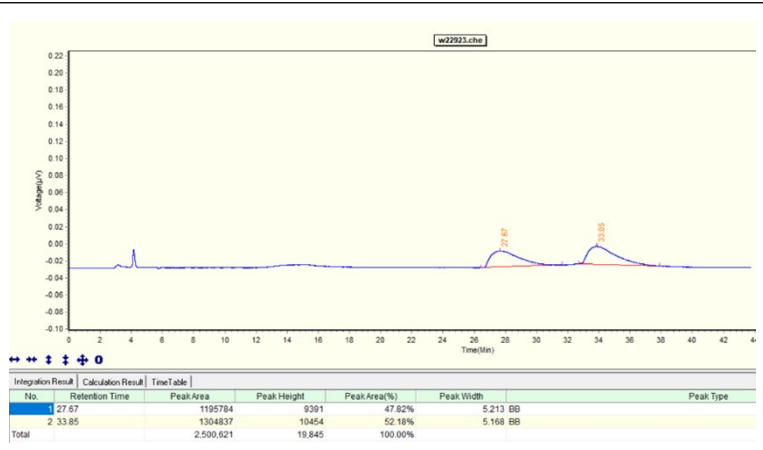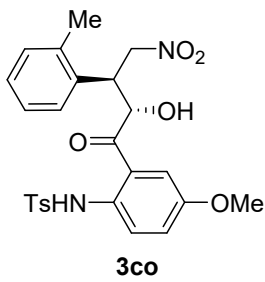

3co

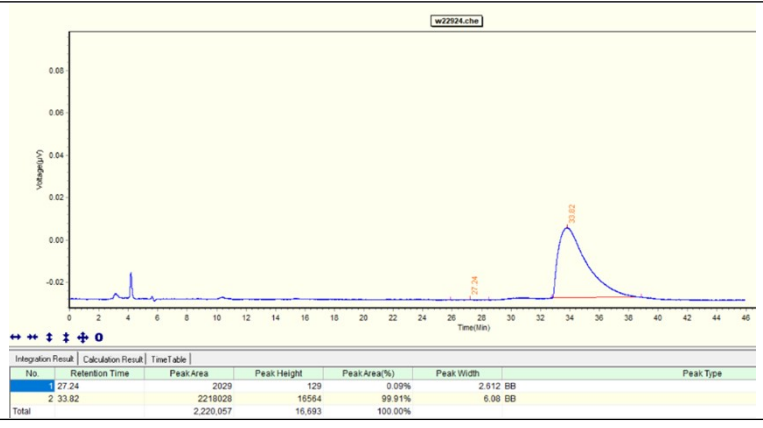

rac-3cp

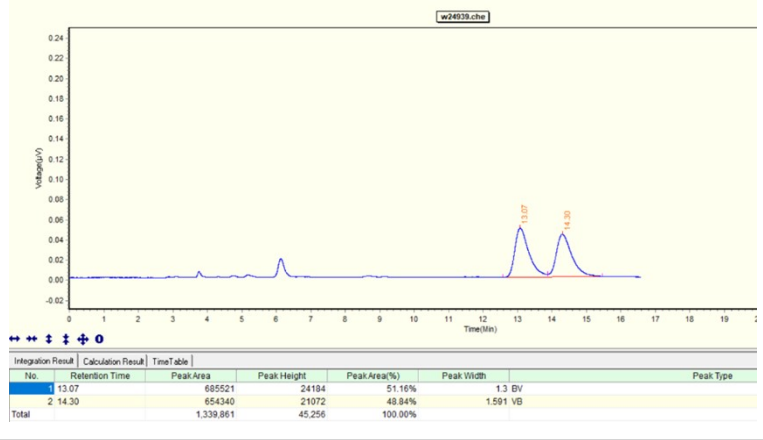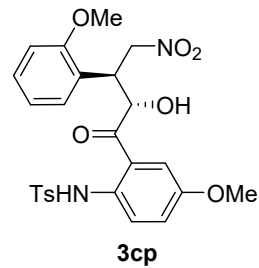

3cp

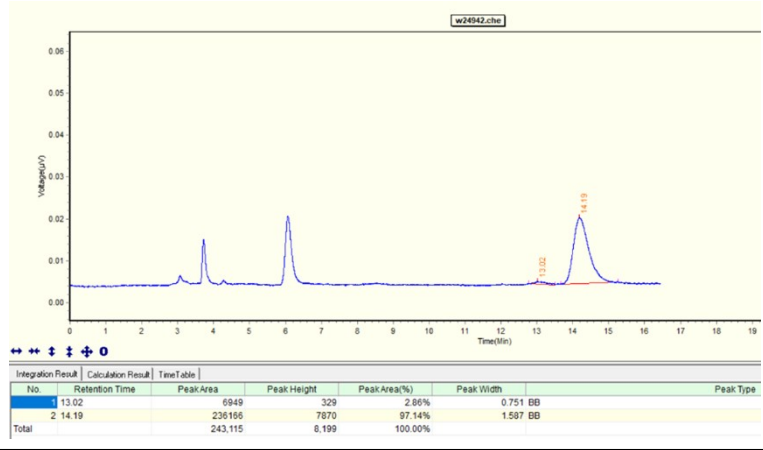

rac-3cq

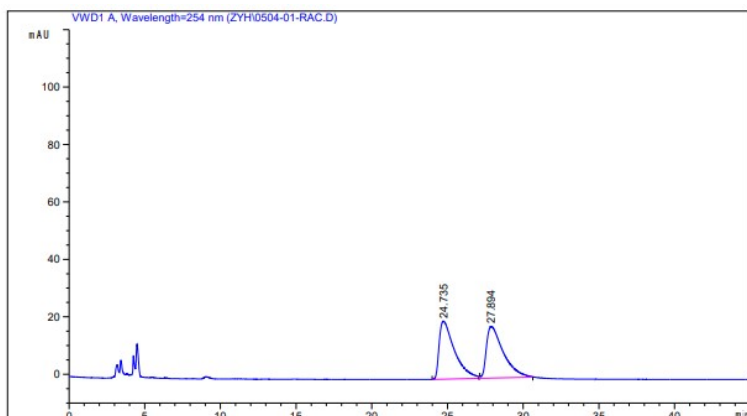

=====  
Area Percent Report  
=====

Sorted By : Signal  
Multiplier : 1.0000  
Dilution : 1.0000  
Use Multiplier & Dilution Factor with ISTDs

Signal 1: VWD1 A, Wavelength=254 nm

| Peak # | RetTime [min] | Type | Width [min] | Area mAU   | *s | Height [mAU] | Area %  |
|--------|---------------|------|-------------|------------|----|--------------|---------|
| 1      | 24.735        | BB   | 1.0038      | 1420.40466 |    | 20.20076     | 50.4411 |
| 2      | 27.894        | BB   | 1.1290      | 1395.56433 |    | 17.99496     | 49.5589 |

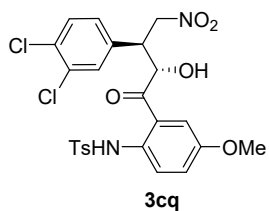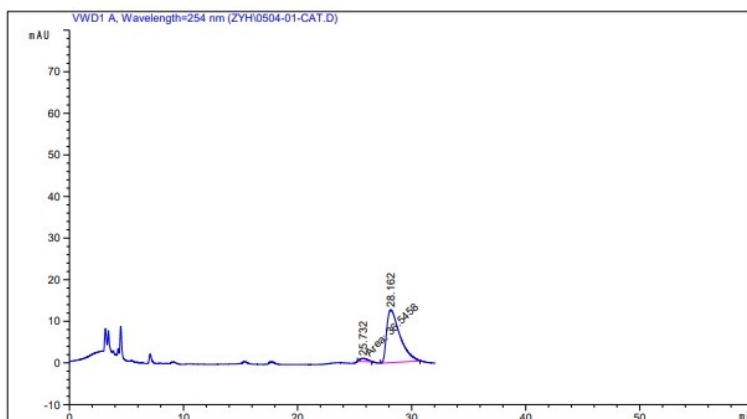

=====  
Area Percent Report  
=====

Sorted By : Signal  
Multiplier : 1.0000  
Dilution : 1.0000  
Use Multiplier & Dilution Factor with ISTDs

Signal 1: VWD1 A, Wavelength=254 nm

| Peak # | RetTime [min] | Type | Width [min] | Area mAU   | *s | Height [mAU] | Area %  |
|--------|---------------|------|-------------|------------|----|--------------|---------|
| 1      | 25.732        | MM   | 0.7749      | 36.54585   |    | 7.85991e-1   | 3.4361  |
| 2      | 28.162        | BB   | 1.1199      | 1027.04968 |    | 12.67692     | 96.5639 |

Totals : 1063.59553 13.46291

rac-3cr

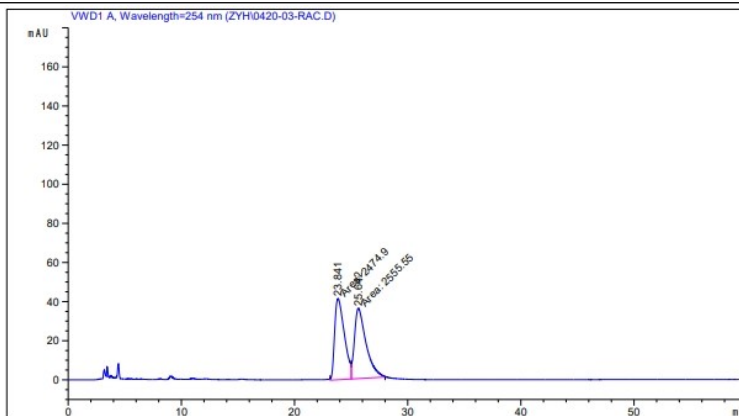

Area Percent Report

Sorted By : Signal  
Multiplier : 1.0000  
Dilution : 1.0000  
Use Multiplier & Dilution Factor with ISTDs

Signal 1: VWD1 A, Wavelength=254 nm

| Peak # | RetTime [min] | Type | Width [min] | Area mAU*s | Height [mAU] | Area %  |
|--------|---------------|------|-------------|------------|--------------|---------|
| 1      | 23.841        | MF   | 0.9953      | 2474.89868 | 41.44232     | 49.1984 |
| 2      | 25.642        | FM   | 1.1872      | 2555.55005 | 35.87693     | 50.8016 |

Totals : 5030.44873 77.31925

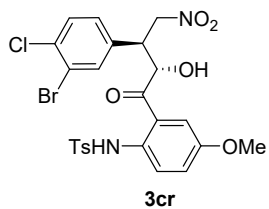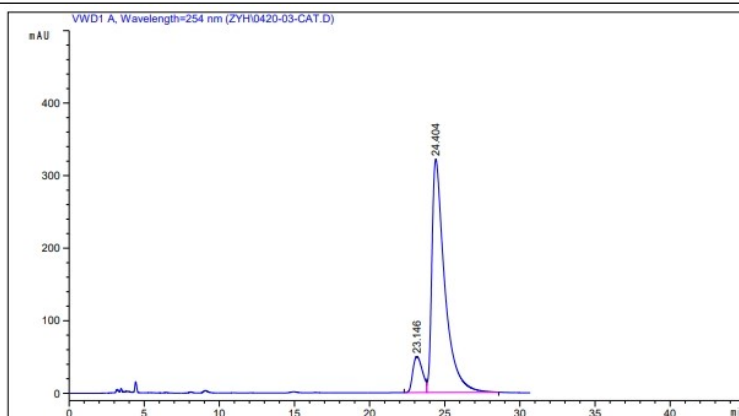

Area Percent Report

Sorted By : Signal  
Multiplier : 1.0000  
Dilution : 1.0000  
Use Multiplier & Dilution Factor with ISTDs

Signal 1: VWD1 A, Wavelength=254 nm

| Peak # | RetTime [min] | Type | Width [min] | Area mAU*s | Height [mAU] | Area %  |
|--------|---------------|------|-------------|------------|--------------|---------|
| 1      | 23.146        | BV   | 0.7065      | 2203.47827 | 49.56121     | 10.3552 |
| 2      | 24.404        | VB   | 0.8607      | 1.90755e4  | 321.69409    | 89.6448 |

Totals : 2.12789e4 371.25531

rac-3cs

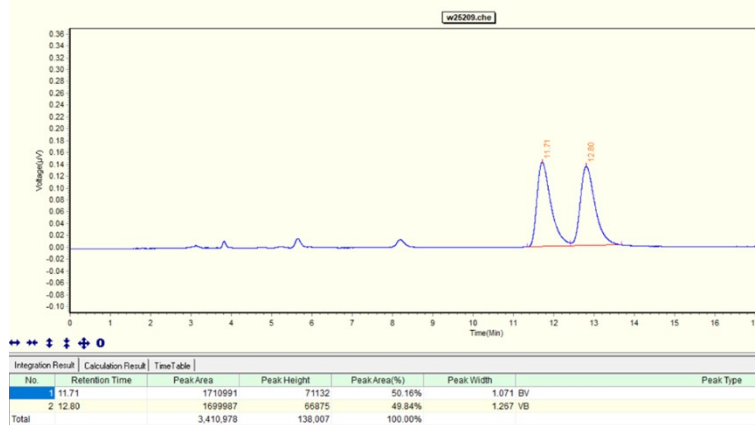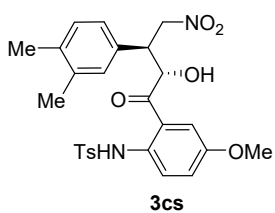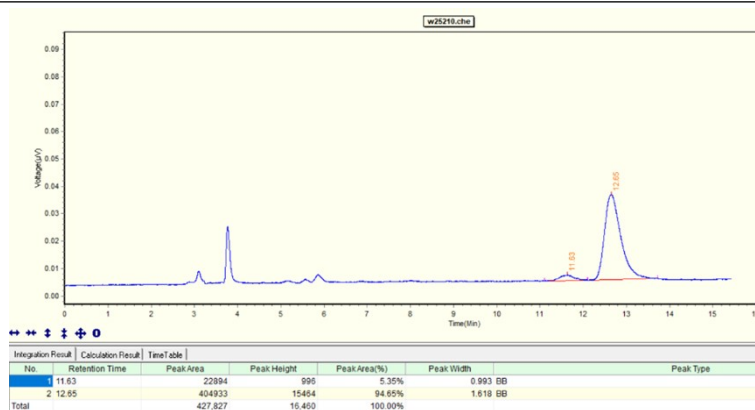

rac-3ct

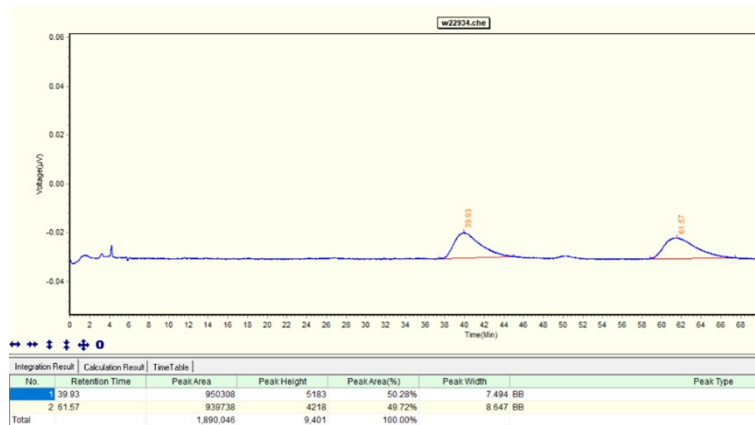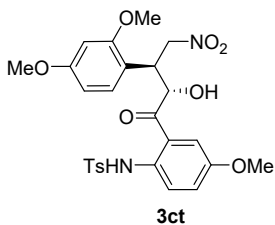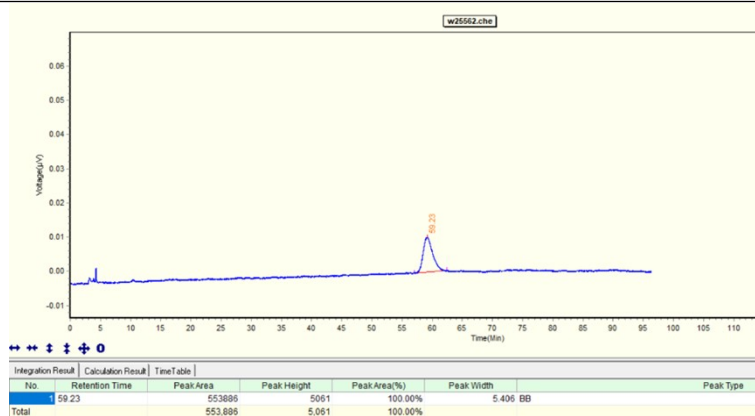



rac-3cu

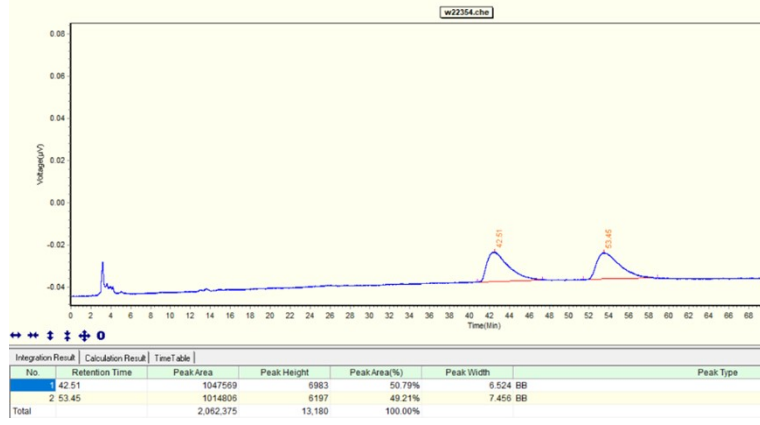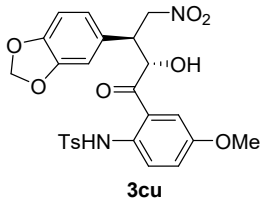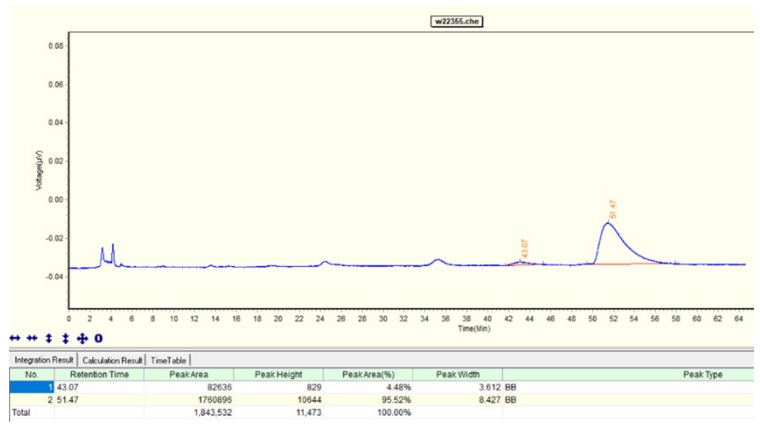

rac-3cv

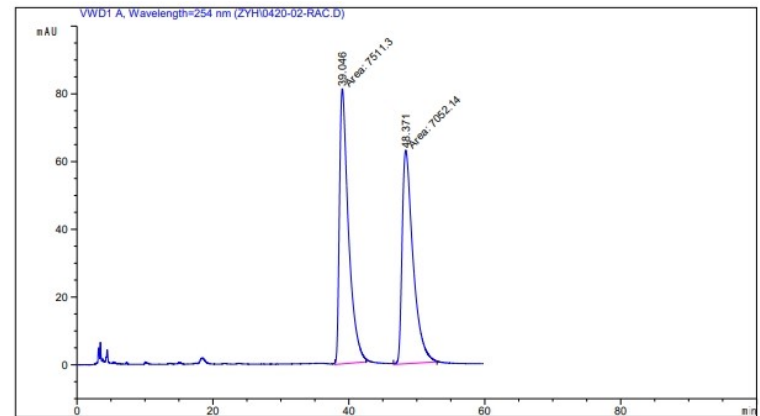

=====  
 Area Percent Report  
 =====

Sorted By : Signal  
 Multiplier : 1.0000  
 Dilution : 1.0000  
 Use Multiplier & Dilution Factor with ISTDs

Signal 1: VWD1 A, Wavelength=254 nm

| Peak #   | RetTime [min] | Type | Width [min] | Area mAU   | Area *s   | Height [mAU] | Area %  |
|----------|---------------|------|-------------|------------|-----------|--------------|---------|
| 1        | 39.046        | MM   | 1.5409      | 7511.29541 | 81.24149  | 81.24149     | 51.5764 |
| 2        | 48.371        | MM   | 1.8658      | 7052.13916 | 62.99588  | 62.99588     | 48.4236 |
| Totals : |               |      |             | 1.45634e4  | 144.23737 |              |         |

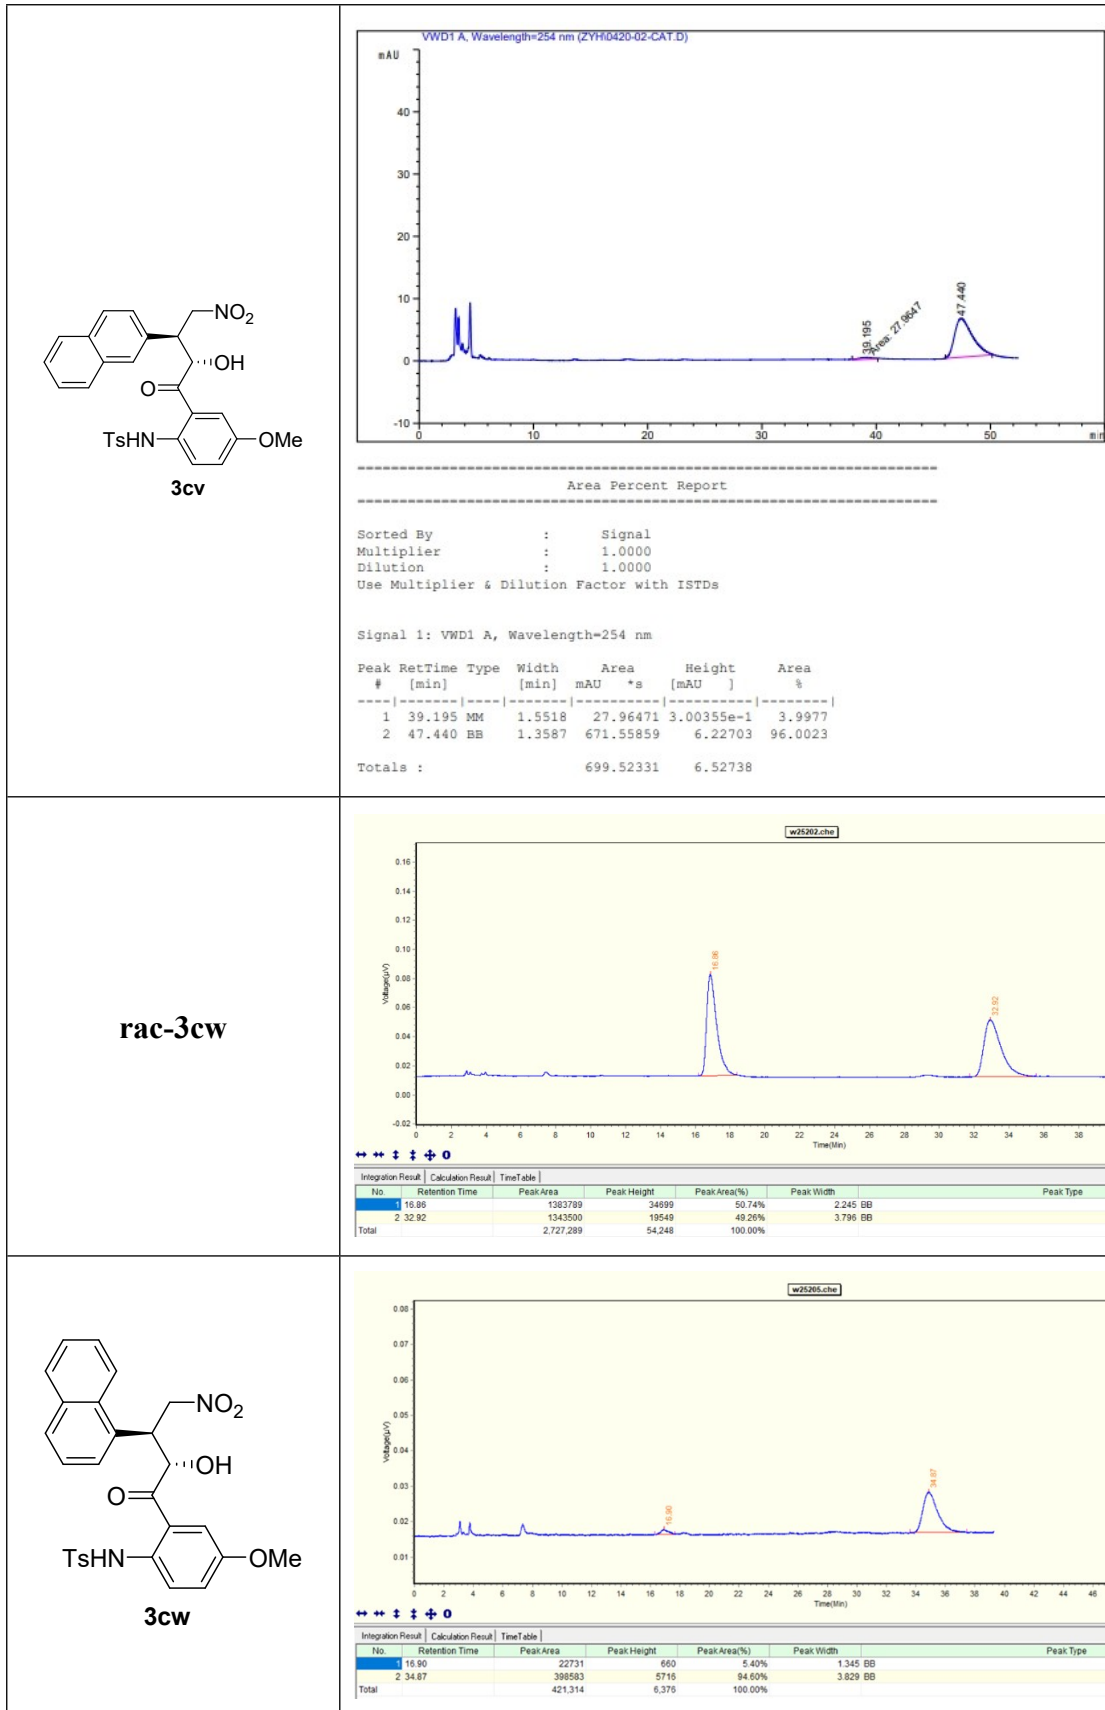

rac-3cx

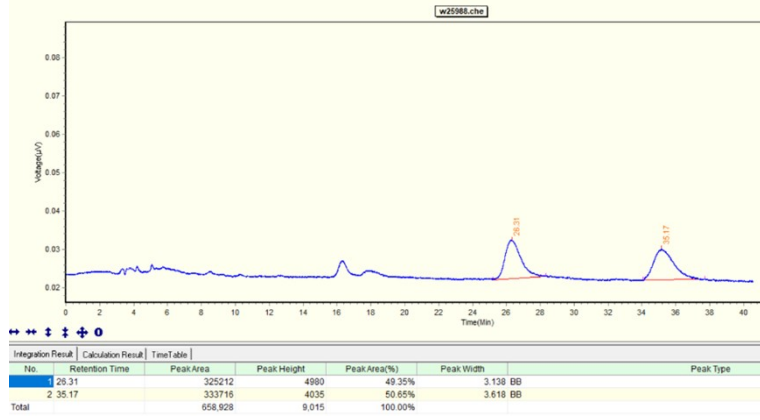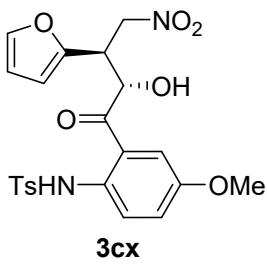

3cx

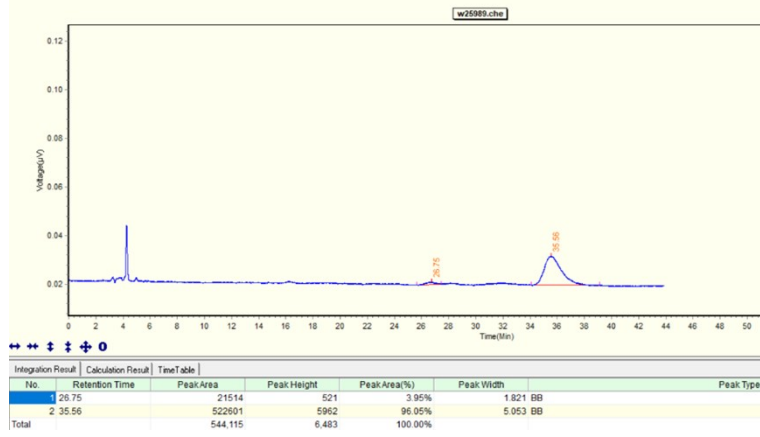

rac-3cy

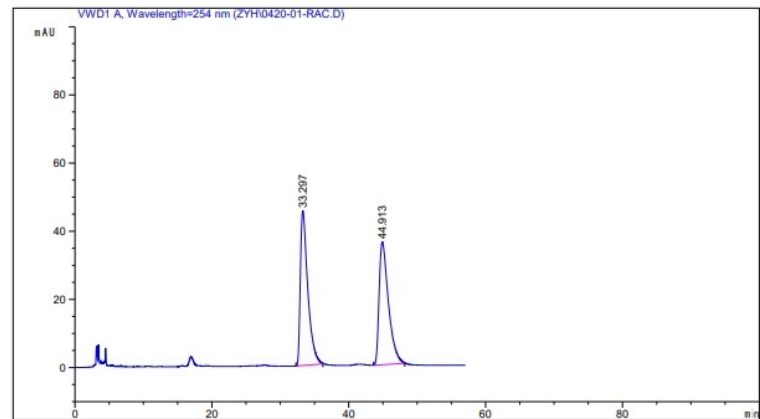

Area Percent Report

```

Sorted By      :      Signal
Multiplier    :      1.0000
Dilution      :      1.0000
Use Multiplier & Dilution Factor with ISTDs

Signal 1: VWD1 A, Wavelength=254 nm

Peak RetTime Type Width Area Height Area
# [min] [min] mAU *s [mAU] %
-----|-----|-----|-----|-----|-----
1 33.297 BB 1.1147 3427.12476 45.34668 50.2465
2 44.913 BB 1.3962 3393.50146 35.92292 49.7535
Totals :                6820.62622 81.26959
    
```

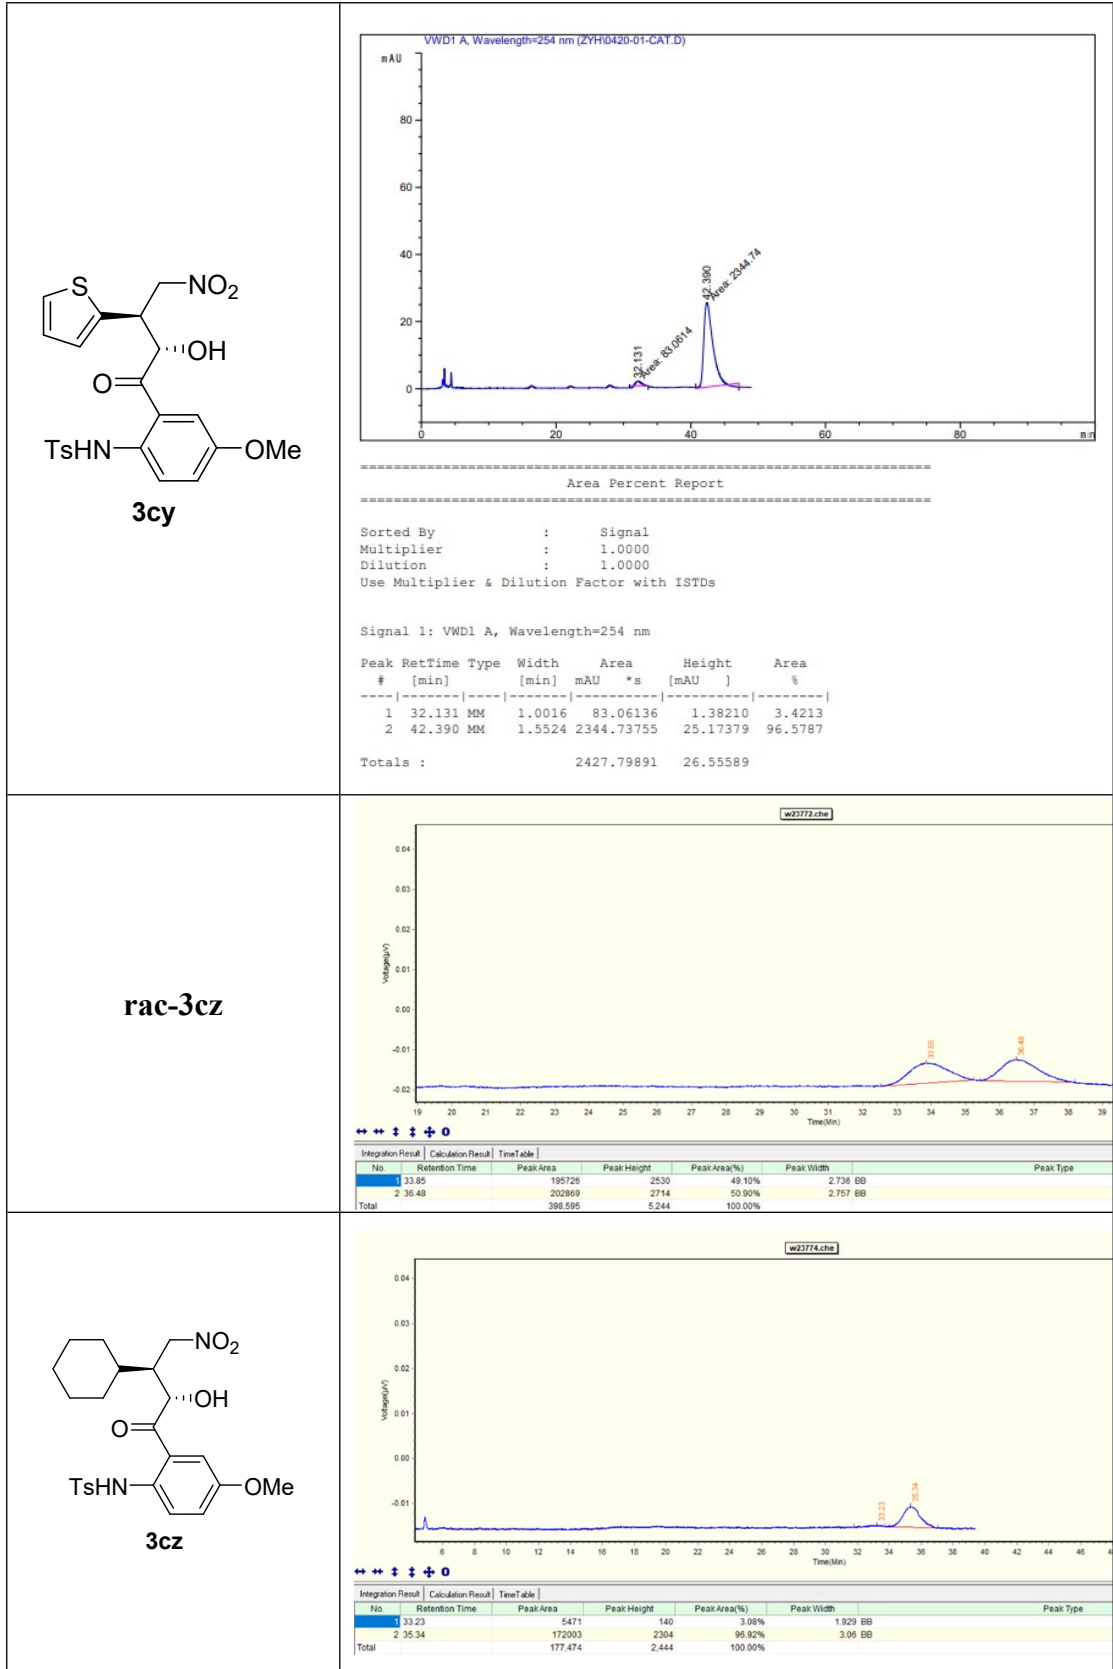

rac-3cza

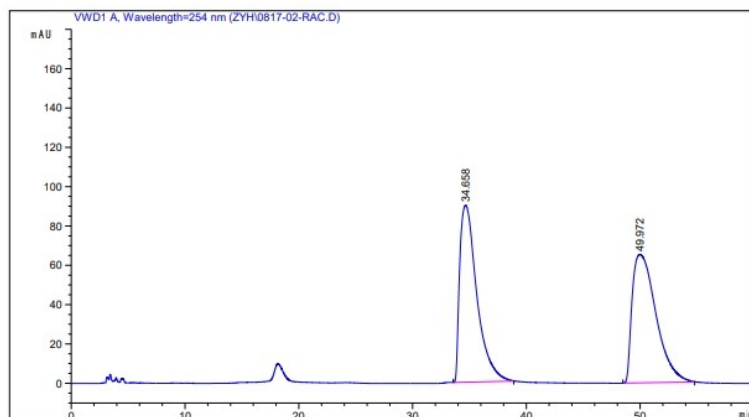

Area Percent Report

Sorted By : Signal  
Multiplier : 1.0000  
Dilution : 1.0000  
Use Multiplier & Dilution Factor with ISTDs

Signal 1: VWD1 A, Wavelength=254 nm

| Peak # | RetTime [min] | Type | Width [min] | Area mAU *s | Height [mAU] | Area %  |
|--------|---------------|------|-------------|-------------|--------------|---------|
| 1      | 34.658        | BB   | 1.6056      | 9423.04785  | 89.91567     | 49.7882 |
| 2      | 49.972        | BB   | 2.1013      | 9503.22168  | 65.29737     | 50.2118 |

Totals : 1.89263e4 155.21304

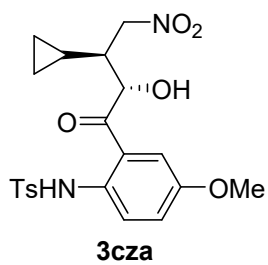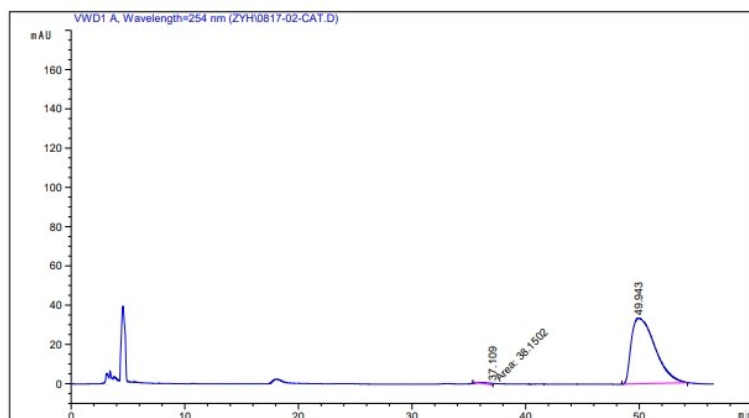

Area Percent Report

Sorted By : Signal  
Multiplier : 1.0000  
Dilution : 1.0000  
Use Multiplier & Dilution Factor with ISTDs

Signal 1: VWD1 A, Wavelength=254 nm

| Peak # | RetTime [min] | Type | Width [min] | Area mAU *s | Height [mAU] | Area %  |
|--------|---------------|------|-------------|-------------|--------------|---------|
| 1      | 37.109        | MM   | 0.8196      | 38.15019    | 7.75749e-1   | 0.7767  |
| 2      | 49.943        | BB   | 1.9495      | 4873.86279  | 33.43832     | 99.2233 |

Totals : 4912.01299 34.21407

rac-3czb

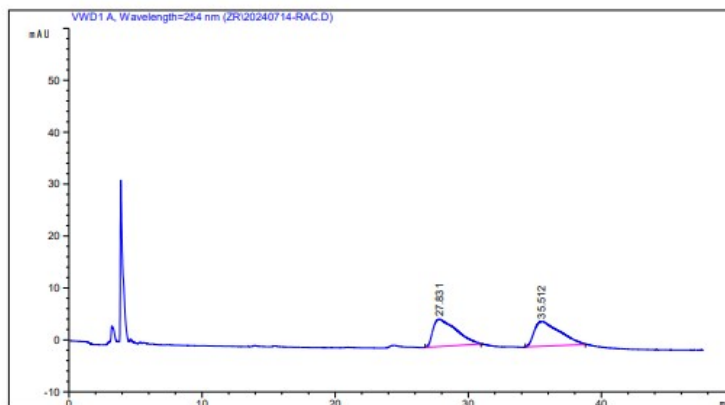

=====  
Area Percent Report  
=====

Sorted By : Signal  
Multiplier : 1.0000  
Dilution : 1.0000  
Sample Amount : 1.00000 [ng/ul] (not used in calc.)  
Use Multiplier & Dilution Factor with ISTDs

Signal 1: VWD1 A, Wavelength=254 nm

| Peak # | RetTime [min] | Type | Width [min] | Area mAU  | Height [mAU] | Area %  |
|--------|---------------|------|-------------|-----------|--------------|---------|
| 1      | 27.831        | BB   | 1.4431      | 640.37787 | 5.26206      | 50.2619 |
| 2      | 35.512        | BB   | 1.5575      | 633.70526 | 4.77807      | 49.7381 |

Totals : 1274.08313 10.04012

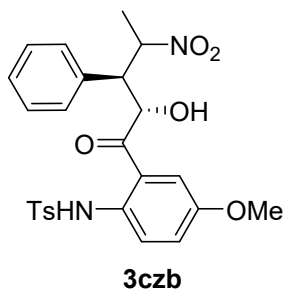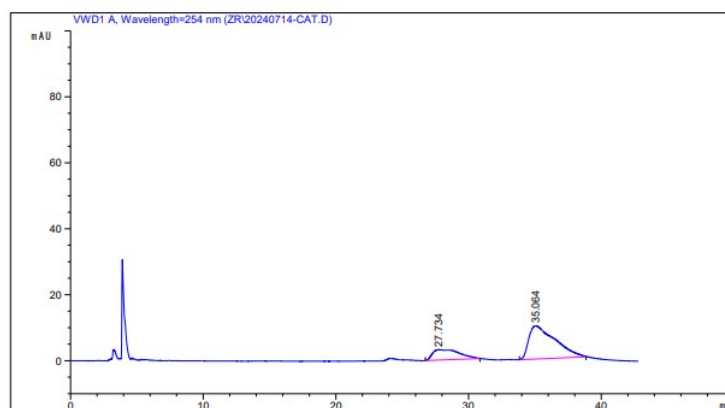

=====  
Area Percent Report  
=====

Sorted By : Signal  
Multiplier : 1.0000  
Dilution : 1.0000  
Sample Amount : 1.00000 [ng/ul] (not used in calc.)  
Use Multiplier & Dilution Factor with ISTDs

Signal 1: VWD1 A, Wavelength=254 nm

| Peak # | RetTime [min] | Type | Width [min] | Area mAU   | Height [mAU] | Area %  |
|--------|---------------|------|-------------|------------|--------------|---------|
| 1      | 27.734        | BB   | 1.6527      | 439.11621  | 3.13847      | 24.0743 |
| 2      | 35.064        | BB   | 1.6576      | 1384.88513 | 10.02905     | 75.9257 |

**HPLC spectra of compound 5, 6 and 7**

rac-5

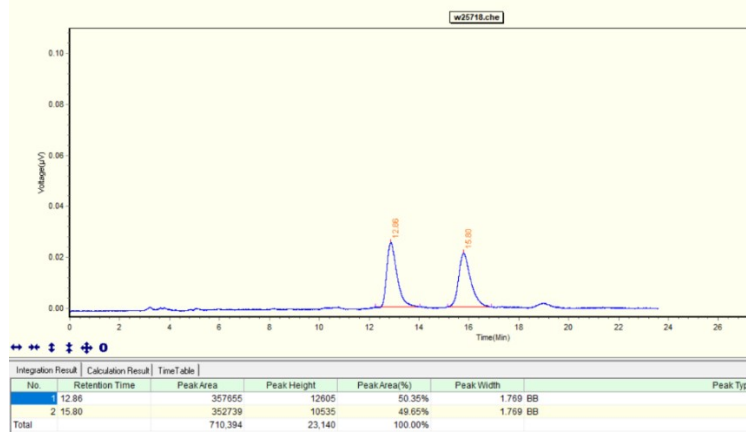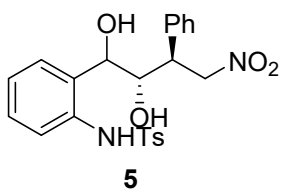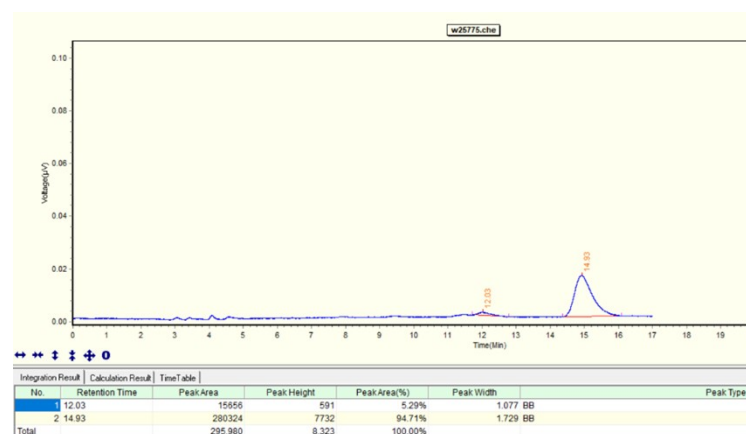

rac-6

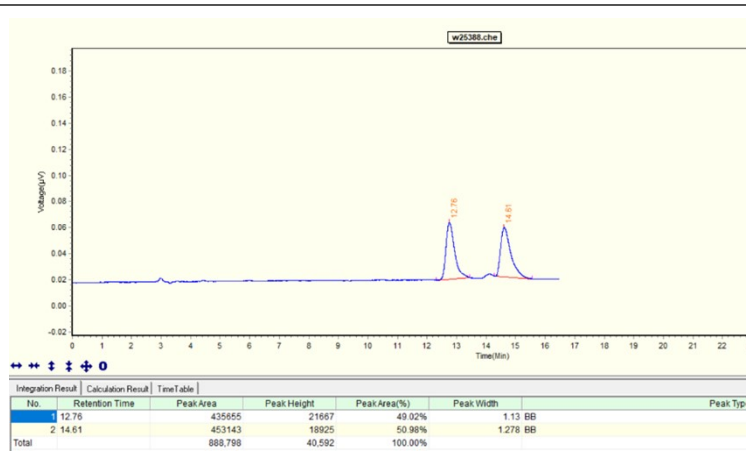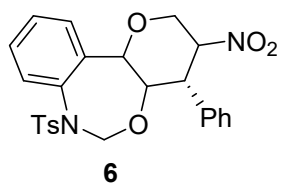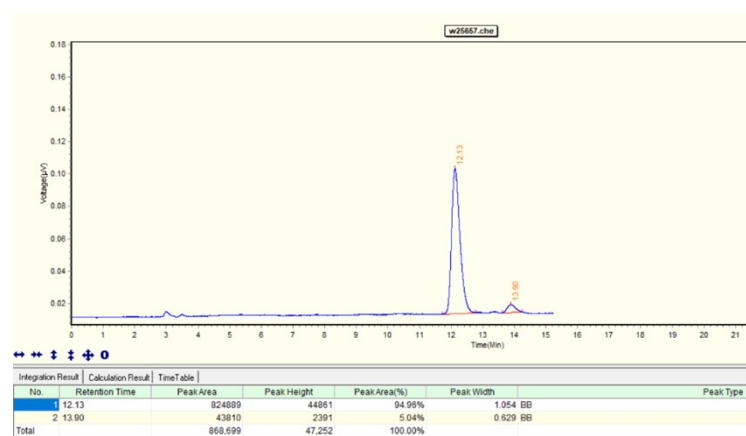

rac-7

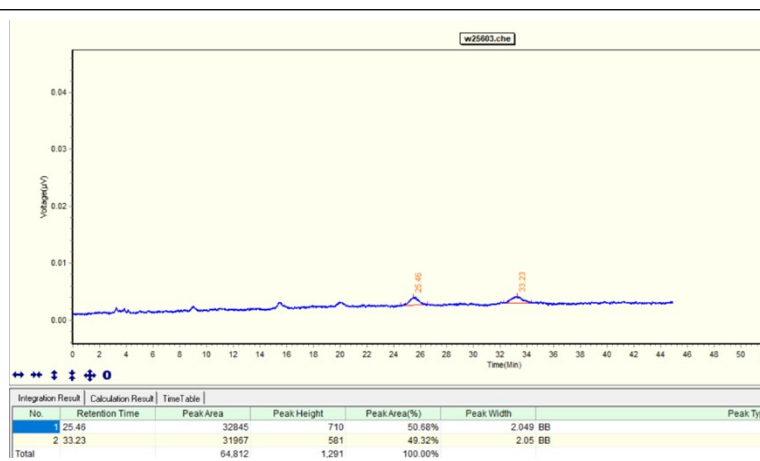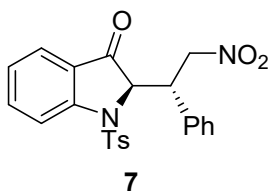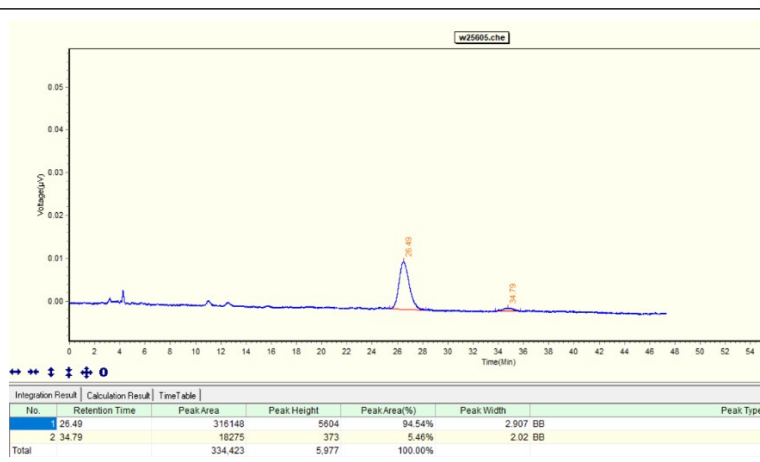



## Single-crystal X-ray diffraction

### Single-crystal X-ray diffraction of **1c'** (CCDC: 2348055)

X-ray analysis was carried out using the single crystal which was grown in DCM/Hexane.

The instrumentation used for the crystal measurement is Oxford Gemini E X-ray single-crystal diffractometer (ellipsoid contour at 30% probability level).

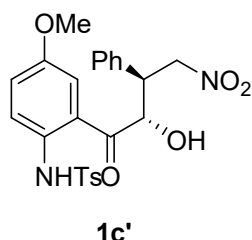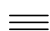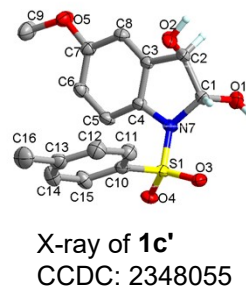

**Table 1 Crystal data and structure refinement for 20230363\_auto.**

|                                             |                                                               |
|---------------------------------------------|---------------------------------------------------------------|
| Identification code                         | 20230363_auto                                                 |
| Empirical formula                           | C <sub>16</sub> H <sub>17</sub> NO <sub>5</sub> S             |
| Formula weight                              | 335.36                                                        |
| Temperature/K                               | 293(2)                                                        |
| Crystal system                              | orthorhombic                                                  |
| Space group                                 | P2 <sub>1</sub> 2 <sub>1</sub> 2 <sub>1</sub>                 |
| a/Å                                         | 8.1853(4)                                                     |
| b/Å                                         | 10.3385(4)                                                    |
| c/Å                                         | 18.6161(10)                                                   |
| α/°                                         | 90                                                            |
| β/°                                         | 90                                                            |
| γ/°                                         | 90                                                            |
| Volume/Å <sup>3</sup>                       | 1575.37(13)                                                   |
| Z                                           | 4                                                             |
| ρ <sub>calc</sub> /cm <sup>3</sup>          | 1.414                                                         |
| μ/mm <sup>-1</sup>                          | 2.060                                                         |
| F(000)                                      | 704.0                                                         |
| Crystal size/mm <sup>3</sup>                | 0.14 × 0.11 × 0.1                                             |
| Radiation                                   | CuKα (λ = 1.54184)                                            |
| 2θ range for data collection/°              | 9.502 to 140.558                                              |
| Index ranges                                | -9 ≤ h ≤ 6, -12 ≤ k ≤ 10, -22 ≤ l ≤ 21                        |
| Reflections collected                       | 5663                                                          |
| Independent reflections                     | 2937 [R <sub>int</sub> = 0.0258, R <sub>sigma</sub> = 0.0388] |
| Data/restraints/parameters                  | 2937/2/215                                                    |
| Goodness-of-fit on F <sup>2</sup>           | 1.035                                                         |
| Final R indexes [I >= 2σ (I)]               | R <sub>1</sub> = 0.0401, wR <sub>2</sub> = 0.1068             |
| Final R indexes [all data]                  | R <sub>1</sub> = 0.0464, wR <sub>2</sub> = 0.1125             |
| Largest diff. peak/hole / e Å <sup>-3</sup> | 0.17/-0.20                                                    |
| Flack parameter                             | -0.008(17)                                                    |

## Single-crystal X-ray diffraction of **3ci** (CCDC: 2348058)

X-ray analysis was carried out using the single crystal which was grown in DCM/Hexane.

The instrumentation used for the crystal measurement is Oxford Gemini E X-ray single-crystal diffractometer (ellipsoid contour at 30% probability level).

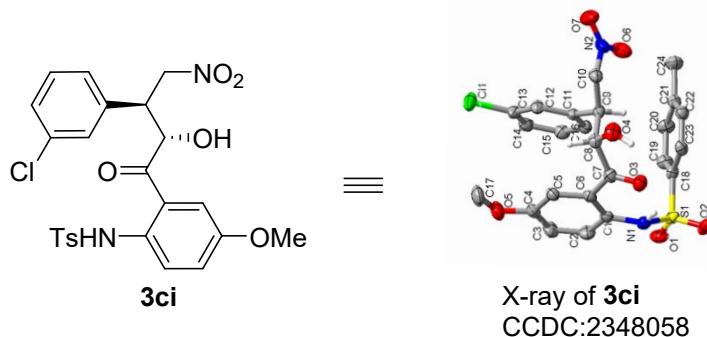

**Table 1 Crystal data and structure refinement for 20230472\_auto.**

|                                             |                                                                   |
|---------------------------------------------|-------------------------------------------------------------------|
| Identification code                         | 20230472_auto                                                     |
| Empirical formula                           | C <sub>24</sub> H <sub>23</sub> ClN <sub>2</sub> O <sub>7</sub> S |
| Formula weight                              | 518.95                                                            |
| Temperature/K                               | 293(2)                                                            |
| Crystal system                              | orthorhombic                                                      |
| Space group                                 | P2 <sub>1</sub> 2 <sub>1</sub> 2 <sub>1</sub>                     |
| a/Å                                         | 7.80415(14)                                                       |
| b/Å                                         | 13.7157(2)                                                        |
| c/Å                                         | 22.4935(3)                                                        |
| α/°                                         | 90                                                                |
| β/°                                         | 90                                                                |
| γ/°                                         | 90                                                                |
| Volume/Å <sup>3</sup>                       | 2407.68(7)                                                        |
| Z                                           | 4                                                                 |
| ρ <sub>calc</sub> /cm <sup>3</sup>          | 1.432                                                             |
| μ/mm <sup>-1</sup>                          | 2.634                                                             |
| F(000)                                      | 1080.0                                                            |
| Crystal size/mm <sup>3</sup>                | 0.16 × 0.1 × 0.08                                                 |
| Radiation                                   | CuKα (λ = 1.54184)                                                |
| 2θ range for data collection/°              | 7.55 to 140.722                                                   |
| Index ranges                                | -9 ≤ h ≤ 5, -14 ≤ k ≤ 16, -24 ≤ l ≤ 27                            |
| Reflections collected                       | 8864                                                              |
| Independent reflections                     | 4519 [R <sub>int</sub> = 0.0316, R <sub>sigma</sub> = 0.0489]     |
| Data/restraints/parameters                  | 4519/26/321                                                       |
| Goodness-of-fit on F <sup>2</sup>           | 1.037                                                             |
| Final R indexes [I >= 2σ (I)]               | R <sub>1</sub> = 0.0482, wR <sub>2</sub> = 0.1184                 |
| Final R indexes [all data]                  | R <sub>1</sub> = 0.0587, wR <sub>2</sub> = 0.1272                 |
| Largest diff. peak/hole / e Å <sup>-3</sup> | 0.23/-0.29                                                        |
| Flack parameter                             | -0.063(17)                                                        |
